# Supplementary material for: Globally diverse Mycobacterium tuberculosis resistance acquisition: a retrospective geographical and temporal analysis of whole genome sequences
Source: PubMed Central journal article supplement (PMC8078851; doi:10.1016/s2666-5247(20)30195-6), 2021-01-27
Supplement: NIHMS1679671-supplement-1.pdf [file NIHMS1679671-supplement-1.pdf]

# THE LANCET Microbe

## Supplementary appendix

This appendix formed part of the original submission and has been peer reviewed. We post it as supplied by the authors.

Supplement to: Ektefaie Y, Dixit A, Freschi L, et al. Globally diverse *Mycobacterium tuberculosis* resistance acquisition: a retrospective geographical and temporal analysis of whole genome sequences. *Lancet Microbe* 2021; published online January 27. [https://doi.org/10.1016/S2666-5247\(20\)30195-6](https://doi.org/10.1016/S2666-5247(20)30195-6).

## Supplementary Methods:

### *Data curation and quality control:*

The isolate metadata including their geographic locations were downloaded using `metatools_ncbi` ([https://github.com/farhat-lab/metatools\\_ncbi](https://github.com/farhat-lab/metatools_ncbi)). We also performed literature curation to fill the gaps in the NCBI geographic location data. The resulting table of the geographic locations of the isolates is available in Supplementary File 1. We excluded isolates that did not meet WGS quality control criteria as detailed below, had no geographic information or were not tested for phenotypic resistance to one or more drugs.

### *Genomic analysis/variant calling*

We used a previously validated genomic analysis pipeline for MTB described by Ezewudo *et al.* (1) with modifications as detailed in the supplement.

### *Genomic analysis/variant calling:*

Briefly, reads were trimmed using PRINSEQ(2) setting average phred score threshold to 20. Raw read data was confirmed to belong to MTB complex using Kraken(3). Isolates with <90% mapping were excluded. Reads were aligned to H37Rv (GenBank NC000962.3) reference genome using BWA MEM(4). Duplicate reads were removed using PICARD(5). We excluded any isolates with coverage <95% of known drug resistance regions (*katG*, *inhA* & its promoter, *rpoB*, *embA*, *embB*, *embC* & *embB* promoter, *ethA*, *gyrA* and *gyrB*, *rrs*, *rpsL*, *gid*, *pncA*, *rpsA*, *eis* promoter) at 10x or higher. Variants were called using Pilon(6) that uses local assembly to increase indel (insertions and deletions) call accuracy. This deviates from Ezewudo *et al.* that uses Samtools for variant calling(1). The reference allele was implied if allele frequency was <75% or the Pilon filter was not PASS. Low confidence coordinates were filtered from all strains if >95% of strains did not have coverage of (trimmed reads) at least 10x at that site. Isolate lineage belonging to one of the seven main MTB lineages was confirmed using the Coll *et al.* SNP barcode(7).

### *Drug resistance definitions and comparison with WHO reported resistance proportions:*

The ‘Mono’ resistant designation was given to isolates that were resistant to only one specific drug and susceptible to all others that were tested, with the exception of the INH-mono resistant category that encompassed any isolates that were resistant to INH and/or STR but not to others that were tested. The ‘Other-R’ category was reserved for isolates that were resistant to some drugs but were neither INH or STR mono resistant, nor MDR or XDR. Isolates were labelled susceptible if they were susceptible to all drugs tested.

To compute exact binomial confidence intervals for MDR proportions by country we used the python library `statsmodel`(8). To assess overlap with World Health Organization (WHO) estimates from the most recent year(9) we determined whether the confidence intervals of our proportion intersected with that of the WHO. We labelled our estimate as high if our confidence interval was higher than the WHO, low if it was lower, and the same if they intersected.

### *Estimating resistance acquisition dates and lower bounds of resistance transmission:*

A maximum likelihood tree was generated for each group via RAXML 8.2.11(10) with H37Rv (NC000962.3) as the outgroup, starting from a neighbour-joining seed tree and assuming a generalized time reversible (GTR) nucleotide substitution model with the  $\Gamma$  distribution used to model site rate heterogeneity(11). We bootstrapped the maximum likelihood tree 1000 times. The maximum likelihood tree was dated using BEAST v1.10.4(12) assuming a relaxed molecular clock with a log normal distribution and a mean rate of 0.5 SNP per genome per year based on prior published data(13). `Sumtrees.py` from the DendroPy library(14) was then used to combine the output from the bootstrap analysis and that of BEAST to get our final dated phylogenetic tree with nodal bootstrap support.

We dated the most recent common ancestor between all the resistant isolates and their most closely related susceptible isolate. Accordingly, the dates of resistance acquisition will be referred to as the estimated age of the most recent *susceptible* common ancestor (MRSCA) in years prior to isolation of the clinical sample(s) throughout the text. We excluded resistant isolates with MRSCAs inferred at nodes with less than 50 bootstrap support.

We calculated the number of phylogenetically inferred resistance acquisition events ( $N_{aq}$ ) per country and lineage as the number of unique MRSCAs identified. This was compared with the total resistant isolates that could be dated

( $N_{td}$ ). Phylogenetically inferred unique resistance acquisition events for a particular country may be related to either *in host* evolution of new resistance or due to human migration/importation from another country with the latter still possibly related to transmission elsewhere. Thus, the following quantity represents a lower bound on the burden of resistance due to transmission for a particular country:

$$(N_{td} - N_{aq})/N_{td}$$

To estimate the order of resistance acquisition for different drugs we pooled the MRSCA dates by drug across countries and lineages. We compared the medians of the MRSCA distributions and performed pairwise Wilcoxon Rank Sum tests to assess for statistical significance, correcting for multiple testing using the Bonferroni approach. Interquartile ranges were calculated using the python package numpy(15).

We correlated the median MRSCA date per drug pooled across countries against the date of drug introduction using linear regression as implemented in Microsoft Excel version 16.25.

#### *Distribution of resistance mutations*

We measured resistance mutations' geographic variance by calculating the proportion of resistant isolates with the resistance mutation per country, excluding countries with less than 10 resistant isolates for a particular drug. We computed the standard deviation of this distribution of proportions across countries. To test cross-country differences in the proportion of INH phenotypically resistant isolates that contained specific mutations, we used a Fisher-test using the python library scipy(16).

We used three resistance mutation lists to perform the resistance prediction. In each case, an isolate harboring one or more mutation from the resistance list was classified as resistant and otherwise as susceptible. "RF-Select: Random forest (RF) is a non-parametric classifier used to select variables most important for prediction. The method involves the construction of a multitude of decision trees and uses a majority vote across the predictions to create a classification. We have used this method previously to generate a list of mutations most important for resistance prediction(17). In contrast the "DA-select" list of mutations was determined based on their individual abundance among resistance and susceptible TB isolates. This list of mutation is also previously published and used in this present analysis as is(18)(19). The "All-WGS" list consists of any non-synonymous mutation or noncoding mutation in known DR regions.

#### *GDP/Programmatic Spending*

To correlate countries' gross domestic product (GDP) per capita against resistance acquisition dates, GDP per capita data for 2019 was gathered from the International Monetary Fund (IMF)(20) and plotted against the median MRSCA date for RIF using Microsoft Excel version 16.25. F-value and significance was calculated via Anova(21) in Excel.

#### *Sensitivity analysis on diversity filter:*

We conducted a sensitivity analysis dating resistance in the 20 groups that were excluded due to the diversity filter. Of the 20, 16 groups were of lineage 2 isolates in Russia (10 drugs) and Uzbekistan (6 drugs) likely representing recent chains of transmission. Beijing (Lineage 2) is thought to be a more transmissible TB lineage and is well documented to result in outbreaks in Central Asia and Russia among other places confirming our suspicion that removing the diversity filter will include data from outbreaks(22). After adding dates from the 20 groups, the overall median MRSCA age of INH, RIF, PZA, EMB, ETH, SLI, FLQ decreases as expected but modestly by -2.3, -1.5, -0.9, -1.5, -1.7, -0.5, -2.3 years respectively. This did not affect the order of resistance acquisition appreciably which remained INH>STR,RIF>EMB,PZA and other drugs. The one exception is that EMB dates are no longer statistically significantly different from PZA and other second line drug resistance. This may have resulted from including the groups representing MDR outbreak settings in Russia and Uzbekistan, and the small difference in median MRSCA between EMB and PZA.

#### *Sensitivity analysis on molecular clock rate:*

We reran dating in 142 groups of 179 country/lineage/drug groups with a mutation rate of 0.3 mutations/genome/year and investigated how MRSCA date distributions change. We were not able to run the

remaining 37 groups as these were the largest groups (in number of isolates) due to limitations in computational resources available.

**Relative Drug Ordering:** We investigated the relative ordering of drugs among the 142 groups that were rerun with a 0.3 mutation rate versus the original 0.5 mutation rate. Supplementary Table 17 shows the median MRSCA with IQR for various drugs. For every drug, changing the mutation rate to 0.3 led to an increase in median MRSCA.

We also investigated how changing the mutation rate led to a change in the relation between the MRSCA distributions of different drugs. In Supplementary Table 18, we show the p-value for the Wilcoxon Rank-Sum Test between the MRSCA distributions of various drugs for each mutation rate. Changing the mutation rate did not change the inferred order drug resistance acquisition.

**MRSCA Date Distribution:** We visualized the MRSCA age distribution for PZA, EMB, FLQ, and SLIs in the three countries with the most MDR isolates (Peru, South Africa, and China) (Supplementary Figure 3). Changing the mutation rate shifted the distribution for MRSCA dates rightwards to older ages but preserved its shape in most cases. Below is the description of recent resistance acquisition among MDR-TB isolates under the 0.3 mutation rate sensitivity analysis and the original 0.5 mutation rate analysis for comparison. Note we have incomplete data for the 0.3 mutation rate as stated above, results from the United Kingdom for PZA and EMB and for Peru for SLIs and EMB and a few other drug-country combinations are missing.

*For 0.3 Mutation Rate:* Among the 9 countries with both MDR and pre-XDR/XDR isolates, we identified five countries (Mali, Peru, Russia, South Africa, Uzbekistan) with recent resistance amplification to PZA or EMB (>1% of MDR) among any lineage. Rates of recent amplification ranged from 10% (95% CI 6% - 16% ) for South Africa in PZA to 20% (15% - 27%) for South Africa in EMB. Peru, Romania, South Africa, and Uzbekistan were measured to have recent resistance amplification to FLQs or SLIs. The median MRSCA age for FLQ or SLI resistance acquisition among MDR isolates was 7.9 years (IQR 3.3 – 16.2) prior to sample collection.

*For 0.5 Mutation Rate:* Among the 11 countries with both MDR and pre-XDR/XDR isolates, we identified eight countries (China, Mali, Peru, Russia, Sierra Leone, South Africa, United Kingdom, Uzbekistan) with recent resistance amplification to PZA or EMB (>1% of MDR) among any lineage. Rates of recent amplification ranged from 2% (95% CI 1% - 4% ) for Russia in PZA to 33% (26% - 41%) for South Africa in EMB. China, Peru, Romania, Russia, South Africa, United Kingdom, and Uzbekistan were also measured to have recent resistance amplification to FLQs or SLIs. The median MRSCA age for FLQ or SLI resistance acquisition among MDR isolates was 5.0 years (IQR 1.9 – 10.0) prior to sample collection.

Although fewer countries were measured to have resistance acquisition (<5 years) to PZA, EMB, SLIs and FLQ as substantial proportion of recent resistance acquisition < 5 years was still measured and the median overall age of SLI or FLQ resistance amplification among MDR-TB only increased by 2.9 years from 5.0 years (IQR 1.9-10, 0.5 mutation rate) to 7.9 years (IQR 3.3-16.2, 0.3 mutation rate).

**Geographic Differences:** We investigated the relative difference in MRSCA distributions between China and Peru (drugs RIF and SLIs) with changing the mutation rate (Supplementary Table 19). For both mutation rates China had older MRSCA dates than Peru (Wilcoxon Rank Sum Test, P-value < 0.01).

**GDP versus MRSCA:** Using the 0.3 mutation rate we reproduced the relationship between GDP and MRSCA across the 142 groups (Linear Regression, F-test with 1 DF, 0.5 Mutation Rate P-value 0.006, 0.3 Mutation Rate P-value of 0.009) (Supplementary Table 20, Supplementary Figure 4).

#### Code

All code used in the analysis is publicly accessible at [https://github.com/farhat-lab/geo\\_dist\\_tb](https://github.com/farhat-lab/geo_dist_tb).

#### Statistical analysis and significance thresholds

For testing we used Fisher exact tests (two binary variables), Wilcoxon Rank sum tests (binary vs continuous) and linear regression (two continuous variables). Across all tests we used a P-value threshold of 0.05 corrected for multiple testing using the Bonferroni method when multiple testing was performed.

**Supplementary Material**

**Supplementary Table 1 Countries Present In Filtration**

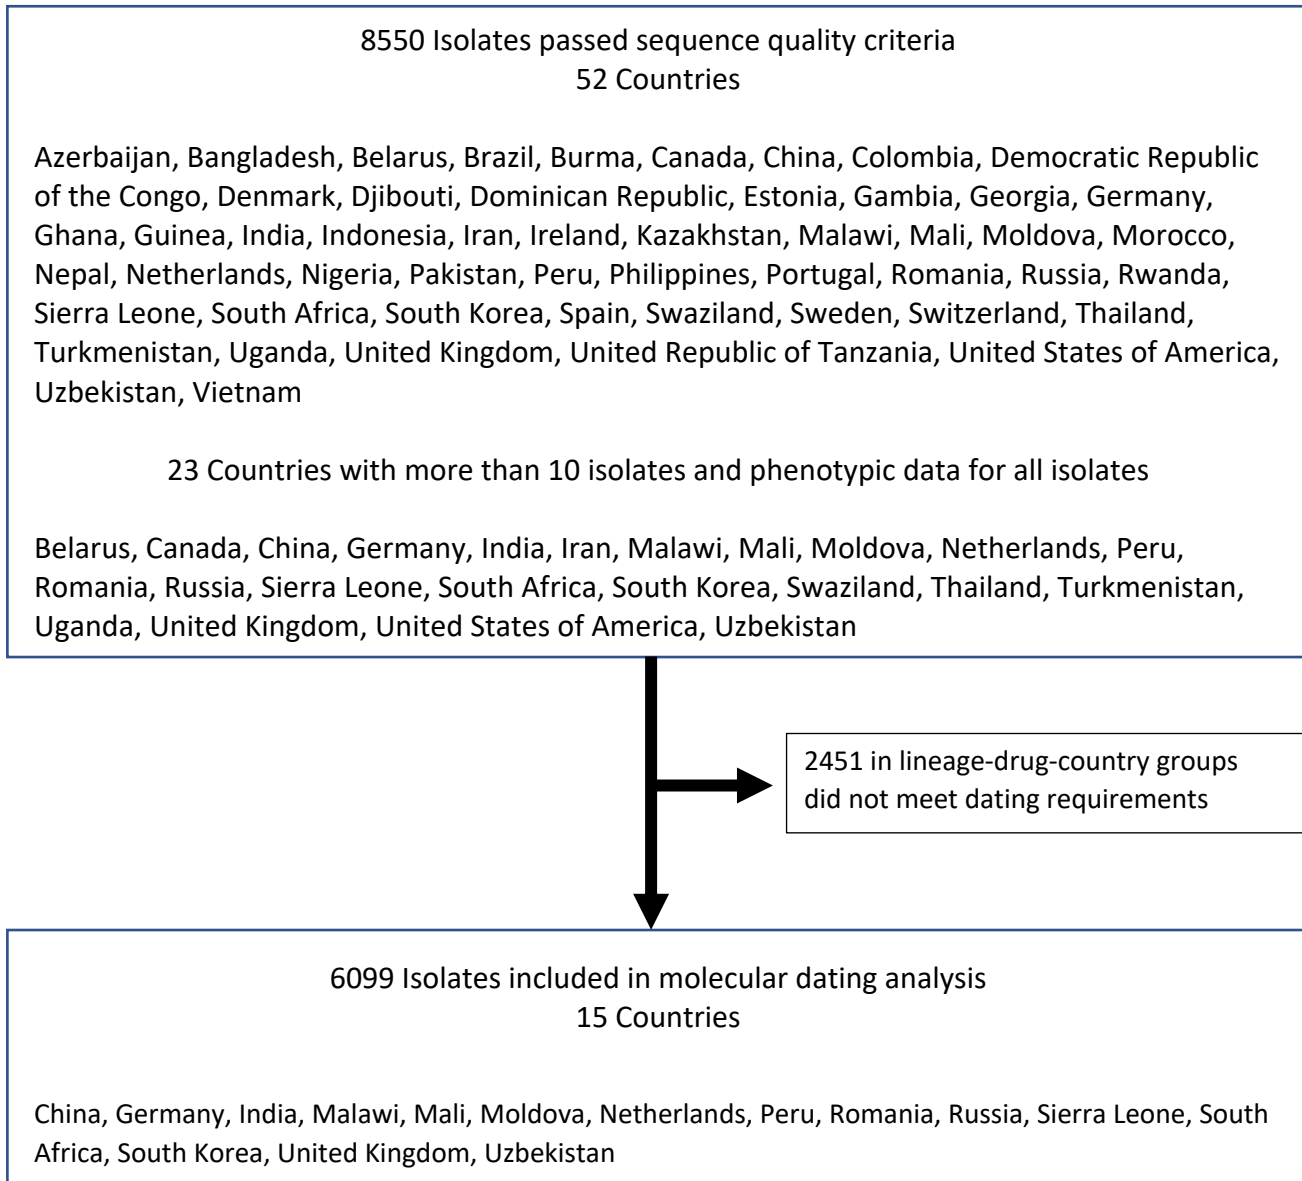

**Supplementary Table 2 Commercial Diagnostics(23)(24)(25)(26)(27):**

| <b>Drug</b>      | <b>Gene</b>   | <b>Location</b> |
|------------------|---------------|-----------------|
| Isoniazid        | katG codon    | 315             |
| Isoniazid        | inhA promoter | -15,-16,-8      |
| Rifamycin        | rpoB codons   | 424-454         |
| Aminoglycosides  | rrs           | 1401,1402       |
| Aminoglycosides  | eis           | -10 to -14, -37 |
| Fluoroquinolones | gyrA          | 89-94           |
| Fluoroquinolones | gyrB          | 500-541         |

\*E-coli 505-534

**Supplementary Table 3 Genes Searched Per Drug.**

Genes searched for resistant mutations in “All WGS Test” (AMK: amikacin, PAS: para-aminosalicylic acid, EMB: ethambutol, CAP: capreomycin, KAN: kanamycin, CIP: ciprofloxacin, INH: isoniazid, STR: streptomycin, RIF: rifampicin, LEVO: levofloxacin, ETH: ethionamide, OFLX: ofloxacin, PZA: pyrazinamide)

| <b>Drug</b> | <b>Genes Searched</b>                                                                             |
|-------------|---------------------------------------------------------------------------------------------------|
| AMK         | rrs                                                                                               |
| PAS         | thyA, inter-thyA-Rv2765, folC, inter-thyX-hsdS.1                                                  |
| EMB         | embA, embB, embC, iniB, inter-embC-embA                                                           |
| CAP         | rrs, tlyA                                                                                         |
| KAN         | rrs, inter-eis-Rv2417c                                                                            |
| CIP         | gyrB, gyrA                                                                                        |
| INH         | inhA, iniB, embB, inter-Rv1482c-fabG1, ahpC, inter-oxyR'-ahpC, inter-embC-embA, kasA, katG, fabG1 |
| STR         | gid, rpsL, rrs, inter-rrs-rrl                                                                     |
| RIF         | rpoB                                                                                              |
| LEVO        | gyrB, gyrA                                                                                        |
| ETH         | inhA, inter-Rv1482c-fabG1, ethA, inter-ethA-ethR                                                  |
| OFLX        | gyrB, gyrA                                                                                        |
| PZA         | inter-pncA-Rv2044c, pncA, rpsA                                                                    |



Supplementary Table 4 Global Lineage Distribution

|                                 | Lineage-1 | Lineage-2 | Lineage-3 | Lineage-4 | Lineage-5 | Lineage-6 | Lineage-7 | Total |
|---------------------------------|-----------|-----------|-----------|-----------|-----------|-----------|-----------|-------|
| <b>Belarus</b>                  | 0         | 87        | 0         | 46        | 0         | 0         | 0         | 135   |
| <b>Canada</b>                   | 0         | 0         | 0         | 17        | 0         | 0         | 0         | 165   |
| <b>China</b>                    | 0         | 132       | 2         | 35        | 0         | 0         | 0         | 170   |
| <b>Germany</b>                  | 0         | 22        | 0         | 1         | 0         | 0         | 0         | 857   |
| <b>India</b>                    | 5         | 9         | 5         | 0         | 0         | 0         | 0         | 52    |
| <b>Iran</b>                     | 0         | 16        | 3         | 1         | 0         | 0         | 0         | 22    |
| <b>Malawi</b>                   | 208       | 10        | 162       | 945       | 0         | 0         | 0         | 1427  |
| <b>Mali</b>                     | 0         | 0         | 0         | 37        | 0         | 0         | 0         | 37    |
| <b>Moldova</b>                  | 0         | 16        | 0         | 35        | 0         | 0         | 0         | 51    |
| <b>Netherlands</b>              | 7         | 19        | 0         | 70        | 0         | 0         | 0         | 98    |
| <b>Peru</b>                     | 0         | 82        | 0         | 869       | 0         | 0         | 0         | 1098  |
| <b>Portugal</b>                 | 0         | 2         | 0         | 10        | 0         | 0         | 0         | 13    |
| <b>Romania</b>                  | 0         | 0         | 0         | 33        | 0         | 0         | 0         | 33    |
| <b>Russia</b>                   | 0         | 525       | 1         | 273       | 0         | 0         | 0         | 868   |
| <b>Sierra Leone</b>             | 3         | 2         | 0         | 41        | 4         | 10        | 0         | 79    |
| <b>South Africa</b>             | 8         | 144       | 23        | 427       | 0         | 0         | 0         | 974   |
| <b>South Korea</b>              | 0         | 37        | 1         | 2         | 0         | 0         | 0         | 80    |
| <b>Swaziland</b>                | 0         | 9         | 0         | 0         | 0         | 0         | 0         | 10    |
| <b>Sweden</b>                   | 2         | 11        | 4         | 11        | 0         | 0         | 0         | 28    |
| <b>Thailand</b>                 | 0         | 2         | 0         | 0         | 0         | 0         | 0         | 17    |
| <b>Turkmenistan</b>             | 0         | 10        | 0         | 0         | 0         | 0         | 0         | 11    |
| <b>Uganda</b>                   | 2         | 3         | 18        | 50        | 0         | 0         | 0         | 80    |
| <b>United Kingdom</b>           | 222       | 102       | 560       | 716       | 9         | 4         | 1         | 1873  |
| <b>United States of America</b> | 1         | 3         | 0         | 0         | 0         | 0         | 0         | 34    |
| <b>Uzbekistan</b>               | 0         | 20        | 0         | 0         | 0         | 0         | 0         | 265   |
| <b>Unknown</b>                  | 37        | 81        | 35        | 792       | 1         | 0         | 0         | 1749  |
| <b>Total</b>                    | 495       | 1344      | 814       | 4411      | 14        | 14        | 1         | 10226 |

**Supplementary Table 5 Global Resistance Distribution and Other Resistance Count**

Abbreviations: Susceptible (S), Multi-drug Resistant (MDR), Extensively Drug Resistant (XDR), Isoniazid Mono Resistant (INH\_MONO), Streptomycin Mono Resistant (STR\_MONO), Other Resistant (OTHER\_R), Sum With Data (SUM\_W\_DATA)

| country             | S    | MDR | XDR | INH MONO | STR MONO | OTHER R | NO DATA | SUM  | SUM W DATA | MDR/OTHER R |
|---------------------|------|-----|-----|----------|----------|---------|---------|------|------------|-------------|
| <b>Belarus</b>      | 28   | 1   | 0   | 1        | 0        | 0       | 105     | 135  | 30         | NA          |
| <b>Canada</b>       | 163  | 0   | 0   | 2        | 0        | 0       | 0       | 165  | 165        | NA          |
| <b>China</b>        | 46   | 117 | 23  | 0        | 0        | 0       | 7       | 170  | 163        | NA          |
| <b>Germany</b>      | 749  | 13  | 0   | 40       | 34       | 14      | 7       | 857  | 850        | 0.9         |
| <b>India</b>        | 22   | 13  | 0   | 2        | 2        | 0       | 13      | 52   | 39         | NA          |
| <b>Iran</b>         | 15   | 6   | 0   | 0        | 0        | 0       | 1       | 22   | 21         | NA          |
| <b>Malawi</b>       | 1302 | 7   | 0   | 90       | 1        | 3       | 24      | 1427 | 1403       | 2           |
| <b>Mali</b>         | 20   | 9   | 0   | 6        | 0        | 0       | 2       | 37   | 35         | NA          |
| <b>Moldova</b>      | 38   | 2   | 0   | 0        | 0        | 0       | 11      | 51   | 40         | NA          |
| <b>Netherlands</b>  | 68   | 0   | 0   | 5        | 20       | 0       | 5       | 98   | 93         | NA          |
| <b>Not Provided</b> | 179  | 646 | 138 | 90       | 6        | 109     | 719     | 1749 | 1030       | 6           |
| <b>Peru</b>         | 94   | 674 | 86  | 34       | 5        | 134     | 157     | 1098 | 941        | 5           |
| <b>Romania</b>      | 0    | 33  | 6   | 0        | 0        | 0       | 0       | 33   | 33         | NA          |
| <b>Russia</b>       | 261  | 420 | 42  | 80       | 17       | 76      | 14      | 868  | 854        | 5.5         |
| <b>Sierra Leone</b> | 41   | 8   | 0   | 7        | 13       | 10      | 0       | 79   | 79         | 0.8         |
| <b>South Africa</b> | 612  | 172 | 102 | 34       | 8        | 56      | 92      | 974  | 882        | 3           |
| <b>South Korea</b>  | 16   | 25  | 21  | 0        | 0        | 0       | 39      | 80   | 41         | NA          |
| <b>Swaziland</b>    | 8    | 1   | 0   | 0        | 0        | 1       | 0       | 10   | 10         | 1           |
| <b>Thailand</b>     | 1    | 15  | 0   | 0        | 0        | 0       | 1       | 17   | 16         | NA          |
| <b>Turkmenistan</b> | 3    | 1   | 0   | 3        | 1        | 3       | 0       | 11   | 11         | 0.3         |
| <b>Uganda</b>       | 10   | 45  | 0   | 1        | 0        | 2       | 22      | 80   | 58         | 23          |

|                                 |      |      |     |     |     |     |      |       |      |     |
|---------------------------------|------|------|-----|-----|-----|-----|------|-------|------|-----|
| <b>United Kingdom</b>           | 1525 | 83   | 4   | 187 | 5   | 50  | 23   | 1873  | 1850 | 1.7 |
| <b>United States of America</b> | 0    | 29   | 1   | 0   | 0   | 1   | 4    | 34    | 30   | 29  |
| <b>Uzbekistan</b>               | 0    | 263  | 3   | 1   | 0   | 1   | 0    | 265   | 265  | 263 |
| <b>Total</b>                    | 5201 | 2583 | 426 | 583 | 112 | 460 | 1246 | 10185 | 8939 | 5.6 |

Abbreviations: RIF (Rifamycin), ETH (Ethionamide), FQ (Fluoroquinolones), SLIS (Second Line Injectable), “\_” (AND—EX: RIF\_ISONIAZID\_ETH = Isolate resistant to Rifamycin, Isoniazid, and Ethionamide)

| <b>Other Resistance Categories</b>                      | <b>Count</b> |
|---------------------------------------------------------|--------------|
| RIF                                                     | 78           |
| PYRAZINAMIDE                                            | 65           |
| ETHAMBUTOL                                              | 44           |
| ISONIAZID ETHAMBUTOL STREPTOMYCIN                       | 29           |
| ISONIAZID_ETHAMBUTOL                                    | 28           |
| ISONIAZID PYRAZINAMIDE                                  | 21           |
| ISONIAZID PYRAZINAMIDE STREPTOMYCIN                     | 16           |
| ISONIAZID_ETHAMBUTOL PYRAZINAMIDE STREPTOMYCIN          | 11           |
| RIF ETHAMBUTOL                                          | 11           |
| RIF STREPTOMYCIN                                        | 10           |
| ISONIAZID STREPTOMYCIN_ETH                              | 9            |
| ISONIAZID_ETHAMBUTOL FQ                                 | 9            |
| SLIS                                                    | 8            |
| ISONIAZID STREPTOMYCIN FQ                               | 8            |
| ETHAMBUTOL FQ                                           | 7            |
| FQ                                                      | 7            |
| ISONIAZID_ETHAMBUTOL STREPTOMYCIN FQ                    | 7            |
| ETHAMBUTOL STREPTOMYCIN                                 | 6            |
| ISONIAZID_ETH                                           | 6            |
| STREPTOMYCIN FQ                                         | 5            |
| ISONIAZID_ETHAMBUTOL PYRAZINAMIDE_ETH                   | 5            |
| ISONIAZID FQ                                            | 4            |
| ISONIAZID_ETHAMBUTOL STREPTOMYCIN_ETH                   | 4            |
| ISONIAZID_ETHAMBUTOL PYRAZINAMIDE STREPTOMYCIN SLIS_ETH | 3            |
| ISONIAZID_ETHAMBUTOL PYRAZINAMIDE STREPTOMYCIN SLIS     | 3            |
| ISONIAZID PYRAZINAMIDE_ETH                              | 3            |
| ETHAMBUTOL PYRAZINAMIDE                                 | 3            |
| RIF PYRAZINAMIDE STREPTOMYCIN                           | 2            |
| RIF_ETHAMBUTOL PYRAZINAMIDE STREPTOMYCIN FQ             | 2            |
| ISONIAZID_ETHAMBUTOL PYRAZINAMIDE STREPTOMYCIN_ETH      | 2            |
| PYRAZINAMIDE STREPTOMYCIN                               | 2            |
| RIF_ETHAMBUTOL STREPTOMYCIN                             | 2            |
| ISONIAZID SLIS                                          | 2            |
| PYRAZINAMIDE SLIS                                       | 2            |
| ISONIAZID_ETHAMBUTOL PYRAZINAMIDE SLIS_ETH              | 2            |
| ISONIAZID_ETHAMBUTOL PYRAZINAMIDE                       | 2            |

|                                                |     |
|------------------------------------------------|-----|
| PYRAZINAMIDE FQ                                | 1   |
| ISONIAZID PYRAZINAMIDE FQ SLIS                 | 1   |
| STREPTOMYCIN SLIS                              | 1   |
| RIF ETHAMBUTOL FQ                              | 1   |
| ISONIAZID ETHAMBUTOL STREPTOMYCIN SLIS ETH     | 1   |
| ISONIAZID ETHAMBUTOL STREPTOMYCIN SLIS         | 1   |
| RIF ETHAMBUTOL STREPTOMYCIN SLIS ETH           | 1   |
| ETH                                            | 1   |
| RIF PYRAZINAMIDE FQ                            | 1   |
| RIF ETHAMBUTOL PYRAZINAMIDE FQ                 | 1   |
| RIF ETHAMBUTOL PYRAZINAMIDE STREPTOMYCIN ETH   | 1   |
| RIF PYRAZINAMIDE                               | 1   |
| ETHAMBUTOL ETH                                 | 1   |
| ISONIAZID ETHAMBUTOL ETH                       | 1   |
| RIF ETHAMBUTOL SLIS                            | 1   |
| ISONIAZID PYRAZINAMIDE STREPTOMYCIN ETH        | 1   |
| RIF PYRAZINAMIDE SLIS ETH                      | 1   |
| RIF ETHAMBUTOL PYRAZINAMIDE                    | 1   |
| RIF ETHAMBUTOL PYRAZINAMIDE STREPTOMYCIN       | 1   |
| ISONIAZID ETHAMBUTOL FQ SLIS                   | 1   |
| ETHAMBUTOL STREPTOMYCIN FQ                     | 1   |
| PYRAZINAMIDE SLIS ETH PAS                      | 1   |
| ISONIAZID STREPTOMYCIN FQ SLIS ETH PAS         | 1   |
| ISONIAZID STREPTOMYCIN SLIS PAS                | 1   |
| ISONIAZID ETHAMBUTOL SLIS                      | 1   |
| RIF ETHAMBUTOL PYRAZINAMIDE FQ SLIS ETH        | 1   |
| RIF FQ SLIS                                    | 1   |
| ISONIAZID PYRAZINAMIDE SLIS                    | 1   |
| ISONIAZID ETHAMBUTOL PYRAZINAMIDE SLIS ETH PAS | 1   |
| RIF ETHAMBUTOL PYRAZINAMIDE SLIS               | 1   |
| RIF PYRAZINAMIDE STREPTOMYCIN FQ SLIS          | 1   |
| ISONIAZID ETHAMBUTOL PYRAZINAMIDE SLIS         | 1   |
| RIF SLIS                                       | 1   |
| RIF FQ                                         | 1   |
|                                                | 462 |

**Supplementary Table 6 MDR Frequency Comparison:**

Comparison of MDR Frequency between our estimate based on WGS data (WGS MDR Frequency) and estimate based on WHO data (WHO MDR Frequency). Number of isolates with resistance data per country is provided in the “Total Number of Isolates” column.

|                                 | <b>WGS MDR Frequency</b> | <b>WHO MDR Frequency</b> | <b>Total Number of Isolates</b> |
|---------------------------------|--------------------------|--------------------------|---------------------------------|
| <b>Belarus</b>                  | 0.03±0.07                | 0.7(0.67-0.75)           | 30                              |
| <b>Canada</b>                   | 0                        | 0.01(0.01-0.02)          | 165                             |
| <b>China</b>                    | 0.7±0.07                 | 0.08(0.07-0.09)          | 163                             |
| <b>Germany</b>                  | 0.02±0.01                | 0.03(0.02-0.05)          | 850                             |
| <b>India</b>                    | 0.3±0.15                 | 0.05(0.04-0.06)          | 39                              |
| <b>Iran</b>                     | 0.3±0.2                  | 0.02(0.01-0.02)          | 21                              |
| <b>Malawi</b>                   | 0.01±0.01                | 0.01(0.01-0.02)          | 1403                            |
| <b>Mali</b>                     | 0.26±0.14                | 0.03(0.02-0.04)          | 35                              |
| <b>Moldova</b>                  | 0.05±0.07                | 0.3(0.31-0.36)           | 40                              |
| <b>Netherlands</b>              | 0                        | 0.02(<0.01-0.01)         | 93                              |
| <b>Not Provided</b>             | 0.6±0.03                 |                          | 1030                            |
| <b>Peru</b>                     | 0.7±0.03                 | 0.09 (0.09-0.1)          | 941                             |
| <b>Romania</b>                  | 1                        | 0.05(0.05-0.06)          | 33                              |
| <b>Russia</b>                   | 0.5±0.03                 | 0.4(0.43-0.44)           | 854                             |
| <b>Sierra Leone</b>             | 0.1±0.07                 | 0.03(0.02-0.04)          | 79                              |
| <b>South Africa</b>             | 0.2±0.03                 | 0.04(0.04-0.05)          | 882                             |
| <b>South Korea</b>              | 0.6±0.15                 | 0.04(0.03-0.04)          | 41                              |
| <b>Swaziland</b>                | 0.1±0.2                  | 0.1(0.09-0.11)           | 10                              |
| <b>Thailand</b>                 | 0.9±0.1                  | 0.03(0.03-0.04)          | 16                              |
| <b>Turkmenistan</b>             | 0.1±0.2                  | 0.2(0.19-0.24)           | 11                              |
| <b>Uganda</b>                   | 0.8±0.1                  | 0.02(0.02-0.03)          | 58                              |
| <b>United Kingdom</b>           | 0.04±0.01                | 0.02(0.01-0.02)          | 1850                            |
| <b>United States of America</b> | 1.0±0.06                 | 0.02(0.01-0.02)          | 30                              |
| <b>Uzbekistan</b>               | 1.0±0.01                 | 0.3(0.29-0.34)           | 265                             |

**Supplementary Figure 7: Number of dates, number of strains, minimum and maximum date for each group used in MRSCA date analysis.**

**Legend: FLQ (Moxifloxacin, Ciprofloxacin, Ofloxacin), SLIs (Kanamycin, Amikacin, Capreomycin), RIF (Rifampicin, Rifabutin), ETH (Ethionamide, Prothionamide), CYS (Cycloserine), EMB (Ethambutol), PAS (Para-Aminosalicylic Acid), STR (Streptomycin), INH (Isoniazid), NIC (Nicotinamide)**

| Country | Lineage  | Drug          | DateMin    | DateMax    | Ndates | Nstrains |
|---------|----------|---------------|------------|------------|--------|----------|
| China   | lineage2 | CAPREOMYCIN   | 3.45984093 | 15.982453  | 14     | 120      |
| China   | lineage2 | ETHAMBUTOL    | 3.37731625 | 24.2409758 | 46     | 126      |
| China   | lineage2 | ETHIONAMIDE   | 3.35009983 | 24.8530463 | 28     | 109      |
| China   | lineage2 | ISONIAZID     | 5.51074158 | 25.0054562 | 81     | 126      |
| China   | lineage2 | KANAMYCIN     | 3.37401405 | 23.8914778 | 14     | 117      |
| China   | lineage2 | OFLOXACIN     | 3.58212906 | 24.8460839 | 37     | 120      |
| China   | lineage2 | RIFAMPICIN    | 4.83828982 | 24.748597  | 81     | 126      |
| China   | lineage2 | STREPTOMYCIN  | 3.22660519 | 24.9597243 | 62     | 126      |
| China   | lineage4 | CAPREOMYCIN   | 2.95305776 | 23.3148212 | 4      | 35       |
| China   | lineage4 | ETHAMBUTOL    | 2.39254698 | 23.7901886 | 12     | 35       |
| China   | lineage4 | ETHIONAMIDE   | 13.0237521 | 17.5053894 | 2      | 34       |
| China   | lineage4 | ISONIAZID     | 8.80960097 | 24.1444241 | 20     | 35       |
| China   | lineage4 | KANAMYCIN     | 2.98842916 | 19.172193  | 4      | 35       |
| China   | lineage4 | OFLOXACIN     | 2.57515411 | 22.5217921 | 7      | 35       |
| China   | lineage4 | RIFAMPICIN    | 8.52590981 | 22.0241404 | 20     | 35       |
| China   | lineage4 | STREPTOMYCIN  | 3.69504275 | 22.9709794 | 9      | 35       |
| Germany | lineage1 | ISONIAZID     | 11.2961235 | 11.2961235 | 1      | 47       |
| Germany | lineage1 | PYRAZINAMIDE  | 13.2689486 | 13.2689486 | 1      | 47       |
| Germany | lineage1 | STREPTOMYCIN  | 11.6075157 | 11.6075157 | 1      | 47       |
| Germany | lineage2 | ETHAMBUTOL    | 4.65720301 | 10.9511898 | 4      | 56       |
| Germany | lineage2 | ISONIAZID     | 2.38996003 | 17.1780776 | 14     | 56       |
| Germany | lineage2 | PROTHIONAMIDE | 9.43255204 | 22.5274111 | 2      | 17       |
| Germany | lineage2 | PYRAZINAMIDE  | 6.32326996 | 15.1863115 | 4      | 55       |
| Germany | lineage2 | RIFAMPICIN    | 3.86662799 | 17.364989  | 7      | 56       |
| Germany | lineage2 | STREPTOMYCIN  | 2.79105154 | 22.866233  | 14     | 55       |
| Germany | lineage3 | ISONIAZID     | 4.51026625 | 35.3640257 | 6      | 55       |
| Germany | lineage3 | STREPTOMYCIN  | 4.75424235 | 36.307397  | 6      | 55       |
| Germany | lineage4 | ETHAMBUTOL    | 21.8805457 | 21.8805457 | 1      | 581      |
| Germany | lineage4 | ISONIAZID     | 2.03159091 | 55.1685886 | 20     | 580      |
| Germany | lineage4 | PYRAZINAMIDE  | 27.4700561 | 28.1184751 | 2      | 580      |
| Germany | lineage4 | RIFAMPICIN    | 8.63846225 | 8.63846225 | 1      | 582      |
| Germany | lineage4 | STREPTOMYCIN  | 1.71517382 | 51.570326  | 29     | 581      |
| India   | lineage2 | ETHAMBUTOL    | 10.3346905 | 26.8143034 | 5      | 13       |

|             |          |              |            |            |     |     |
|-------------|----------|--------------|------------|------------|-----|-----|
| India       | lineage2 | RIFAMPICIN   | 10.0781515 | 25.1249811 | 9   | 13  |
| India       | lineage2 | STREPTOMYCIN | 12.0283797 | 25.9637928 | 6   | 13  |
| Malawi      | lineage1 | ISONIAZID    | 13.396797  | 19.1215413 | 7   | 188 |
| Malawi      | lineage1 | STREPTOMYCIN | 4.19097854 | 16.765887  | 6   | 46  |
| Malawi      | lineage3 | ISONIAZID    | 10.8912891 | 18.7337636 | 6   | 147 |
| Malawi      | lineage3 | RIFAMPICIN   | 5.41310346 | 5.41310346 | 1   | 147 |
| Malawi      | lineage4 | ISONIAZID    | 3.37549005 | 12.1101526 | 24  | 860 |
| Malawi      | lineage4 | PYRAZINAMIDE | 5.00451284 | 6.70174994 | 3   | 181 |
| Malawi      | lineage4 | RIFAMPICIN   | 5.44611036 | 6.62057578 | 4   | 860 |
| Malawi      | lineage4 | STREPTOMYCIN | 4.6566478  | 55.6670933 | 17  | 210 |
| Mali        | lineage4 | ETHAMBUTOL   | 2.72404297 | 34.6278714 | 5   | 22  |
| Mali        | lineage4 | ISONIAZID    | 4.97300099 | 42.3524858 | 12  | 24  |
| Mali        | lineage4 | RIFAMPICIN   | 2.46719771 | 33.7581211 | 5   | 23  |
| Mali        | lineage4 | STREPTOMYCIN | 2.46170816 | 42.8394983 | 8   | 21  |
| Moldova     | lineage4 | ETHAMBUTOL   | 1.5340503  | 3.86485636 | 6   | 34  |
| Moldova     | lineage4 | RIFAMPICIN   | 2.82848387 | 4.56603418 | 7   | 34  |
| Netherlands | lineage4 | ISONIAZID    | 0.75516493 | 15.7722802 | 3   | 60  |
| Netherlands | lineage4 | STREPTOMYCIN | 7.31797932 | 15.7456994 | 5   | 60  |
| Peru        | lineage2 | AMIKACIN     | 5.85239501 | 23.7060501 | 5   | 68  |
| Peru        | lineage2 | CAPREOMYCIN  | 12.2962929 | 59.7518977 | 6   | 67  |
| Peru        | lineage2 | ETHAMBUTOL   | 0.84233477 | 23.3368004 | 29  | 71  |
| Peru        | lineage2 | ETHIONAMIDE  | 3.15412045 | 16.3944557 | 6   | 67  |
| Peru        | lineage2 | ISONIAZID    | 3.96902846 | 37.049243  | 36  | 70  |
| Peru        | lineage2 | KANAMYCIN    | 21.7752016 | 26.8889065 | 4   | 67  |
| Peru        | lineage2 | MOXIFLOXACIN | 6.40783111 | 11.9277359 | 6   | 67  |
| Peru        | lineage2 | PYRAZINAMIDE | 1.27516939 | 66.3620373 | 18  | 66  |
| Peru        | lineage2 | RIFABUTIN    | 2.54931656 | 59.6284281 | 15  | 67  |
| Peru        | lineage2 | RIFAMPICIN   | 2.15441269 | 35.4384595 | 29  | 70  |
| Peru        | lineage2 | STREPTOMYCIN | 1.65717543 | 27.040606  | 30  | 71  |
| Peru        | lineage4 | AMIKACIN     | 0.71878918 | 21.235315  | 62  | 834 |
| Peru        | lineage4 | CAPREOMYCIN  | 0.45620301 | 20.9603883 | 90  | 836 |
| Peru        | lineage4 | ETHAMBUTOL   | 0.24556105 | 61.8951336 | 366 | 848 |
| Peru        | lineage4 | ETHIONAMIDE  | 0.20541336 | 36.3621585 | 128 | 837 |
| Peru        | lineage4 | KANAMYCIN    | 0.77529421 | 21.8857849 | 80  | 838 |
| Peru        | lineage4 | MOXIFLOXACIN | 0.1352287  | 24.5999574 | 62  | 838 |
| Peru        | lineage4 | PYRAZINAMIDE | 0.16785888 | 37.9068111 | 249 | 836 |
| Peru        | lineage4 | RIFABUTIN    | 0.22769151 | 63.8170599 | 290 | 836 |
| Peru        | lineage4 | RIFAMPICIN   | 0.23406283 | 65.1097268 | 380 | 846 |
| Peru        | lineage4 | STREPTOMYCIN | 0.29405066 | 40.4717248 | 217 | 849 |



|              |          |                          |            |            |     |     |
|--------------|----------|--------------------------|------------|------------|-----|-----|
| Romania      | lineage4 | AMIKACIN                 | 1.39730865 | 37.5979497 | 6   | 24  |
| Romania      | lineage4 | KANAMYCIN                | 1.22541928 | 37.8051561 | 9   | 24  |
| Romania      | lineage4 | OFLOXACIN                | 1.3867589  | 18.1948415 | 8   | 24  |
| Romania      | lineage4 | STREPTOMYCIN             | 2.25843497 | 37.0637158 | 18  | 24  |
| Russia       | lineage4 | AMIKACIN                 | 2.86589749 | 12.3950523 | 6   | 81  |
| Russia       | lineage4 | CAPREOMYCIN              | 2.09346181 | 6.81421611 | 6   | 81  |
| Russia       | lineage4 | ETHAMBUTOL               | 1.92899389 | 20.3561089 | 34  | 272 |
| Russia       | lineage4 | ISONIAZID                | 1.76618006 | 22.6826158 | 107 | 272 |
| Russia       | lineage4 | MOXIFLOXACIN             | 1.47224284 | 26.8682661 | 8   | 72  |
| Russia       | lineage4 | OFLOXACIN                | 2.24412437 | 25.4136502 | 11  | 81  |
| Russia       | lineage4 | PROTHIONAMIDE            | 1.99531033 | 32.3899523 | 24  | 77  |
| Russia       | lineage4 | PYRAZINAMIDE             | 2.01748677 | 28.0784826 | 35  | 271 |
| Russia       | lineage4 | RIFAMPICIN               | 1.80284765 | 22.9829059 | 71  | 272 |
| Russia       | lineage4 | STREPTOMYCIN             | 1.43352364 | 27.2493466 | 92  | 272 |
| Sierra Leone | lineage4 | ETHAMBUTOL               | 3.58661725 | 38.3431992 | 7   | 54  |
| Sierra Leone | lineage4 | ISONIAZID                | 3.58460162 | 37.579056  | 14  | 54  |
| Sierra Leone | lineage4 | PYRAZINAMIDE             | 3.24393546 | 8.26437787 | 3   | 54  |
| Sierra Leone | lineage4 | RIFAMPICIN               | 3.11704905 | 39.4228803 | 7   | 54  |
| Sierra Leone | lineage4 | STREPTOMYCIN             | 4.30714626 | 41.8355374 | 25  | 54  |
| Sierra Leone | lineage6 | ETHAMBUTOL               | 7.22084469 | 7.22084469 | 1   | 13  |
| Sierra Leone | lineage6 | ISONIAZID                | 5.63814912 | 15.2731798 | 3   | 13  |
| Sierra Leone | lineage6 | PYRAZINAMIDE             | 6.48117814 | 6.48117814 | 1   | 13  |
| Sierra Leone | lineage6 | RIFAMPICIN               | 6.80992989 | 6.80992989 | 1   | 13  |
| Sierra Leone | lineage6 | STREPTOMYCIN             | 6.97020683 | 7.65250547 | 2   | 13  |
| South Africa | lineage1 | KANAMYCIN                | 1.85113964 | 2.42645491 | 2   | 11  |
| South Africa | lineage1 | OFLOXACIN                | 2.69081132 | 2.69081132 | 1   | 11  |
| South Africa | lineage1 | RIFAMPICIN               | 11.4706731 | 13.1399868 | 6   | 11  |
| South Africa | lineage1 | STREPTOMYCIN             | 11.966305  | 11.966305  | 5   | 11  |
| South Africa | lineage2 | AMIKACIN                 | 1.24686812 | 8.1096853  | 40  | 185 |
| South Africa | lineage2 | CAPREOMYCIN              | 0.51613006 | 5.33061692 | 36  | 204 |
| South Africa | lineage2 | CYCLOSERINE              | 0.88658318 | 3.73536405 | 14  | 94  |
| South Africa | lineage2 | ETHAMBUTOL               | 0.63614699 | 4.82426007 | 45  | 228 |
| South Africa | lineage2 | ETHIONAMIDE              | 0.98541416 | 4.688532   | 27  | 117 |
| South Africa | lineage2 | ISONIAZID                | 0.62310473 | 7.63656863 | 62  | 235 |
| South Africa | lineage2 | KANAMYCIN                | 0.61266545 | 8.12053365 | 46  | 222 |
| South Africa | lineage2 | MOXIFLOXACIN             | 0.66851319 | 6.26083091 | 28  | 197 |
| South Africa | lineage2 | OFLOXACIN                | 0.50956701 | 6.50664166 | 41  | 228 |
| South Africa | lineage2 | PARA-AMINOSALICYLIC_ACID | 1.04542312 | 1.1426862  | 2   | 94  |

|                |          |               |            |            |     |     |
|----------------|----------|---------------|------------|------------|-----|-----|
| South Africa   | lineage2 | PYRAZINAMIDE  | 1.29778195 | 7.82642287 | 40  | 188 |
| South Africa   | lineage2 | RIFAMPICIN    | 0.71101793 | 8.17285666 | 60  | 228 |
| South Africa   | lineage2 | STREPTOMYCIN  | 0.92064293 | 7.12905176 | 39  | 233 |
| South Africa   | lineage3 | ETHAMBUTOL    | 2.14135238 | 2.14135238 | 1   | 25  |
| South Africa   | lineage3 | ISONIAZID     | 3.59255781 | 8.72534418 | 6   | 27  |
| South Africa   | lineage3 | OFLOXACIN     | 3.2230357  | 3.2230357  | 1   | 24  |
| South Africa   | lineage3 | PYRAZINAMIDE  | 5.46801635 | 5.46801635 | 1   | 20  |
| South Africa   | lineage3 | RIFAMPICIN    | 3.9388676  | 4.52702298 | 5   | 27  |
| South Africa   | lineage3 | STREPTOMYCIN  | 8.12275203 | 8.12275203 | 3   | 23  |
| South Africa   | lineage4 | AMIKACIN      | 1.31297781 | 8.31201078 | 12  | 312 |
| South Africa   | lineage4 | CAPREOMYCIN   | 0.63214955 | 12.5108026 | 25  | 397 |
| South Africa   | lineage4 | CIPROFLOXACIN | 1.61924361 | 2.04148373 | 5   | 24  |
| South Africa   | lineage4 | CYCLOSERINE   | 1.26383208 | 13.813988  | 3   | 17  |
| South Africa   | lineage4 | ETHAMBUTOL    | 0.57709825 | 51.7329068 | 40  | 433 |
| South Africa   | lineage4 | ETHIONAMIDE   | 0.84700929 | 27.4506369 | 23  | 99  |
| South Africa   | lineage4 | ISONIAZID     | 0.68075679 | 55.0883957 | 110 | 463 |
| South Africa   | lineage4 | KANAMYCIN     | 0.41297531 | 7.99280861 | 31  | 438 |
| South Africa   | lineage4 | MOXIFLOXACIN  | 1.28047981 | 37.829983  | 15  | 332 |
| South Africa   | lineage4 | NICOTINAMIDE  | 1.19555431 | 25.6138377 | 14  | 58  |
| South Africa   | lineage4 | OFLOXACIN     | 0.74263956 | 17.5183596 | 37  | 433 |
| South Africa   | lineage4 | PYRAZINAMIDE  | 1.36093204 | 37.3084331 | 34  | 328 |
| South Africa   | lineage4 | RIFAMPICIN    | 0.81200268 | 54.5208129 | 95  | 447 |
| South Africa   | lineage4 | STREPTOMYCIN  | 0.48549215 | 46.1827541 | 73  | 441 |
| South Korea    | lineage2 | AMIKACIN      | 7.07477744 | 54.0189436 | 12  | 20  |
| South Korea    | lineage2 | CYCLOSERINE   | 1.79203541 | 25.6562634 | 6   | 19  |
| South Korea    | lineage2 | ETHIONAMIDE   | 1.14922024 | 52.171675  | 16  | 20  |
| South Korea    | lineage2 | KANAMYCIN     | 8.30862501 | 52.9876676 | 13  | 20  |
| South Korea    | lineage2 | MOXIFLOXACIN  | 2.40581152 | 29.5529413 | 7   | 13  |
| South Korea    | lineage2 | RIFABUTIN     | 7.09475867 | 25.5445206 | 14  | 19  |
| South Korea    | lineage2 | STREPTOMYCIN  | 11.6923909 | 52.4422229 | 5   | 18  |
| South Korea    | lineage3 | CAPREOMYCIN   | 16.3177658 | 38.5632113 | 5   | 15  |
| South Korea    | lineage3 | ETHIONAMIDE   | 18.6648822 | 18.6648822 | 1   | 15  |
| United Kingdom | lineage1 | ETHAMBUTOL    | 18.1985203 | 32.0307606 | 6   | 256 |
| United Kingdom | lineage1 | ISONIAZID     | 2.92439445 | 35.1407718 | 54  | 256 |
| United Kingdom | lineage1 | PYRAZINAMIDE  | 12.474108  | 24.3064771 | 10  | 255 |
| United Kingdom | lineage1 | RIFAMPICIN    | 14.3194018 | 30.9861484 | 10  | 257 |
| United Kingdom | lineage1 | STREPTOMYCIN  | 7.14701312 | 23.8543679 | 5   | 64  |

|                |          |               |            |            |    |     |
|----------------|----------|---------------|------------|------------|----|-----|
| United Kingdom | lineage2 | AMIKACIN      | 3.2986758  | 27.5402301 | 5  | 21  |
| United Kingdom | lineage2 | CAPREOMYCIN   | 3.73214962 | 26.5622266 | 5  | 21  |
| United Kingdom | lineage2 | CIPROFLOXACIN | 3.92334653 | 26.3210851 | 2  | 21  |
| United Kingdom | lineage2 | ETHAMBUTOL    | 1.94240671 | 15.3771182 | 19 | 109 |
| United Kingdom | lineage2 | ISONIAZID     | 4.06772187 | 28.5736922 | 30 | 112 |
| United Kingdom | lineage2 | KANAMYCIN     | 3.38774353 | 25.5457027 | 7  | 21  |
| United Kingdom | lineage2 | MOXIFLOXACIN  | 4.83390928 | 25.2953986 | 4  | 21  |
| United Kingdom | lineage2 | OFLOXACIN     | 4.88603615 | 23.0684328 | 5  | 20  |
| United Kingdom | lineage2 | PYRAZINAMIDE  | 4.29427743 | 8.43998683 | 10 | 113 |
| United Kingdom | lineage2 | RIFAMPICIN    | 4.32592129 | 24.4565159 | 26 | 110 |
| United Kingdom | lineage2 | STREPTOMYCIN  | 6.56750011 | 22.668357  | 13 | 49  |
| United Kingdom | lineage3 | CIPROFLOXACIN | 14.49252   | 18.3543198 | 4  | 86  |
| United Kingdom | lineage3 | ETHAMBUTOL    | 16.1645946 | 21.5108466 | 2  | 629 |
| United Kingdom | lineage3 | ISONIAZID     | 5.30637527 | 29.6236332 | 73 | 630 |
| United Kingdom | lineage3 | MOXIFLOXACIN  | 22.3408648 | 22.3408648 | 2  | 24  |
| United Kingdom | lineage3 | OFLOXACIN     | 15.9337336 | 22.9495038 | 3  | 24  |
| United Kingdom | lineage3 | PYRAZINAMIDE  | 5.93852757 | 23.1971077 | 7  | 629 |
| United Kingdom | lineage3 | RIFAMPICIN    | 5.51932189 | 25.4676869 | 19 | 630 |
| United Kingdom | lineage3 | STREPTOMYCIN  | 4.36332444 | 17.2928121 | 4  | 94  |
| United Kingdom | lineage4 | CAPREOMYCIN   | 15.3044832 | 15.3044832 | 1  | 26  |
| United Kingdom | lineage4 | CIPROFLOXACIN | 5.11353832 | 20.1491402 | 8  | 126 |
| United Kingdom | lineage4 | ETHAMBUTOL    | 5.65250433 | 20.0110555 | 8  | 753 |
| United Kingdom | lineage4 | ISONIAZID     | 5.46289596 | 24.0248095 | 27 | 756 |
| United Kingdom | lineage4 | MOXIFLOXACIN  | 4.70010935 | 8.36192806 | 5  | 24  |
| United Kingdom | lineage4 | OFLOXACIN     | 5.63610139 | 8.34281432 | 4  | 24  |
| United Kingdom | lineage4 | PYRAZINAMIDE  | 3.45300439 | 15.2102373 | 9  | 750 |
| United Kingdom | lineage4 | RIFAMPICIN    | 2.36193259 | 19.0450145 | 19 | 753 |

|                |          |              |            |            |    |     |
|----------------|----------|--------------|------------|------------|----|-----|
| United Kingdom | lineage4 | STREPTOMYCIN | 2.71912994 | 15.2138273 | 11 | 155 |
| Uzbekistan     | lineage4 | AMIKACIN     | 0.95802284 | 20.5554703 | 5  | 26  |
| Uzbekistan     | lineage4 | CAPREOMYCIN  | 1.12546009 | 22.0902573 | 6  | 26  |
| Uzbekistan     | lineage4 | ETHAMBUTOL   | 1.01437782 | 18.3039446 | 17 | 37  |
| Uzbekistan     | lineage4 | PYRAZINAMIDE | 1.03596132 | 18.2158075 | 8  | 37  |

**Supplementary Table 8 Transmission rate estimates and association with GDP by country.** Transmission rate X/Y indicates X unique MRSCA dates/Y number of MRSCA dates for a specific country and drug. Legend: unique = number of unique MRSCA dates for drug and country, total = total number of dated resistant isolates for drug and country, Lower Bound (LB) = (total-unique)/total, Note: Data for country fewer than 10 resistant isolates per drug not shown.

|                       | <u>Pooled</u> |       |                 | <u>INH</u> |       |                 | <u>RIF</u> |       |                 | <u>PZA</u> |       |                 |
|-----------------------|---------------|-------|-----------------|------------|-------|-----------------|------------|-------|-----------------|------------|-------|-----------------|
| <u>Country</u>        | unique        | total | LB Transmission | unique     | total | LB Transmission | unique     | total | LB Transmission | unique     | total | LB Transmission |
| <b>China</b>          | 296           | 441   | 33%             | 56         | 101   | 45%             | 56         | 101   | 45%             |            |       |                 |
| <b>Germany</b>        | 90            | 113   | 20%             | 30         | 41    | 27%             |            |       |                 |            |       |                 |
| <b>India</b>          | 13            | 20    | 35%             |            |       |                 |            |       |                 |            |       |                 |
| <b>Malawi</b>         | 44            | 68    | 35%             | 23         | 37    | 38%             |            |       |                 |            |       |                 |
| <b>Mali</b>           | 18            | 30    | 40%             | 5          | 12    | 58%             |            |       |                 |            |       |                 |
| <b>Moldova</b>        | 8             | 13    | 38%             |            |       |                 |            |       |                 |            |       |                 |
| <b>Netherlands</b>    |               |       |                 |            |       |                 |            |       |                 |            |       |                 |
| <b>Peru</b>           | 1260          | 2116  | 40%             | 12         | 36    | 67%             | 382        | 715   | 47%             | 177        | 268   | 34%             |
| <b>Romania</b>        | 29            | 41    | 29%             |            |       |                 |            |       |                 |            |       |                 |
| <b>Russia</b>         | 302           | 394   | 23%             | 73         | 107   | 32%             | 56         | 71    | 21%             | 32         | 35    | 9%              |
| <b>Sierra Leone</b>   | 48            | 64    | 25%             | 14         | 17    | 18%             |            |       |                 |            |       |                 |
| <b>South Africa</b>   | 491           | 1015  | 52%             | 69         | 178   | 61%             | 72         | 167   | 57%             | 34         | 75    | 55%             |
| <b>South Korea</b>    | 43            | 79    | 46%             |            |       |                 | 5          | 14    | 64%             |            |       |                 |
| <b>United Kingdom</b> | 299           | 416   | 28%             | 133        | 184   | 28%             | 49         | 74    | 34%             | 27         | 36    | 25%             |
| <b>Uzbekistan</b>     | 31            | 36    | 14%             |            |       |                 |            |       |                 |            |       |                 |
| <b>Total</b>          | 2972          | 4846  | 39%             | 415        | 713   | 42%             | 620        | 1142  | 46%             | 270        | 414   | 35%             |

|                       | <b>FLQ</b>    |              |                        | <b>STR</b>    |              |                        | <b>SLIs</b>   |              |                        | <b>EMB</b>    |              |                        |
|-----------------------|---------------|--------------|------------------------|---------------|--------------|------------------------|---------------|--------------|------------------------|---------------|--------------|------------------------|
| <b>Country</b>        | <b>unique</b> | <b>total</b> | <b>LB Transmission</b> | <b>unique</b> | <b>total</b> | <b>LB Transmission</b> | <b>unique</b> | <b>total</b> | <b>LB Transmission</b> | <b>unique</b> | <b>total</b> | <b>LB Transmission</b> |
| <b>China</b>          | 32            | 44           | 27%                    | 48            | 71           | 32%                    | 33            | 36           | 8%                     | 52            | 58           | 10%                    |
| <b>Germany</b>        |               |              |                        | 40            | 50           | 20%                    |               |              |                        |               |              |                        |
| <b>India</b>          |               |              |                        |               |              |                        |               |              |                        |               |              |                        |
| <b>Malawi</b>         |               |              |                        | 15            | 23           | 35%                    |               |              |                        |               |              |                        |
| <b>Mali</b>           |               |              |                        |               |              |                        |               |              |                        |               |              |                        |
| <b>Moldova</b>        |               |              |                        |               |              |                        |               |              |                        |               |              |                        |
| <b>Netherlands</b>    |               |              |                        |               |              |                        |               |              |                        |               |              |                        |
| <b>Peru</b>           | 59            | 68           | 13%                    | 170           | 247          | 31%                    | 194           | 251          | 23%                    | 239           | 395          | 39%                    |
| <b>Romania</b>        |               |              |                        | 9             | 18           | 50%                    | 13            | 15           | 13%                    |               |              |                        |
| <b>Russia</b>         | 19            | 19           | 0%                     | 69            | 92           | 25%                    | 10            | 12           | 17%                    | 31            | 34           | 9%                     |
| <b>Sierra Leone</b>   |               |              |                        | 16            | 27           | 41%                    |               |              |                        |               |              |                        |
| <b>South Africa</b>   | 79            | 128          | 38%                    | 65            | 120          | 46%                    | 86            | 192          | 55%                    | 54            | 86           | 37%                    |
| <b>South Korea</b>    |               |              |                        |               |              |                        | 14            | 30           | 53%                    |               |              |                        |
| <b>United Kingdom</b> | 27            | 37           | 27%                    | 28            | 33           | 15%                    | 14            | 17           | 18%                    | 21            | 35           | 40%                    |
| <b>Uzbekistan</b>     |               |              |                        |               |              |                        | 9             | 11           | 18%                    | 14            | 17           | 18%                    |
| <b>Total</b>          | 216           | 296          | 27%                    | 460           | 681          | 32%                    | 373           | 564          | 34%                    | 411           | 625          | 34%                    |

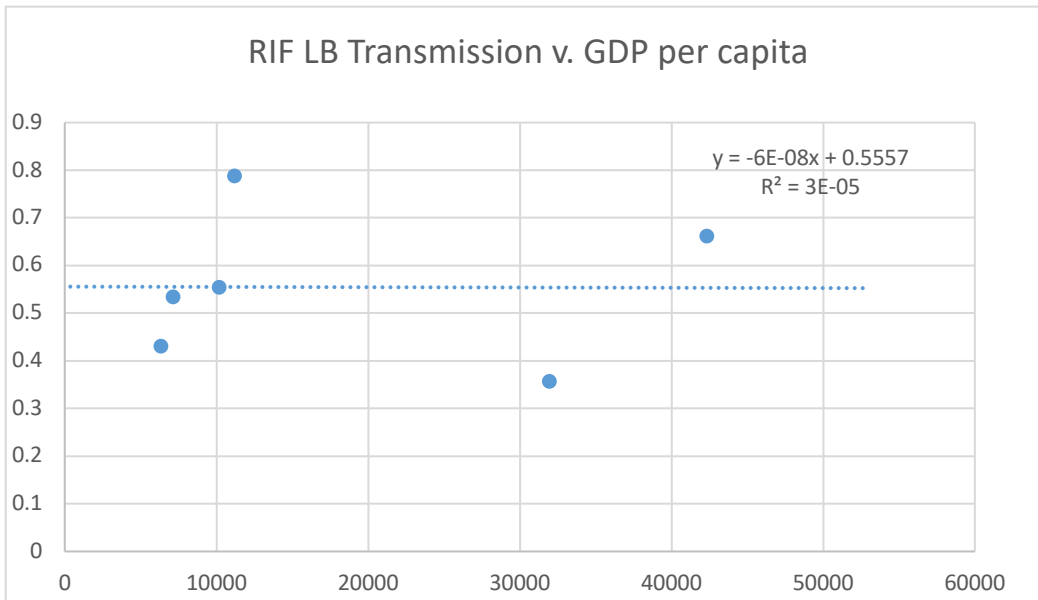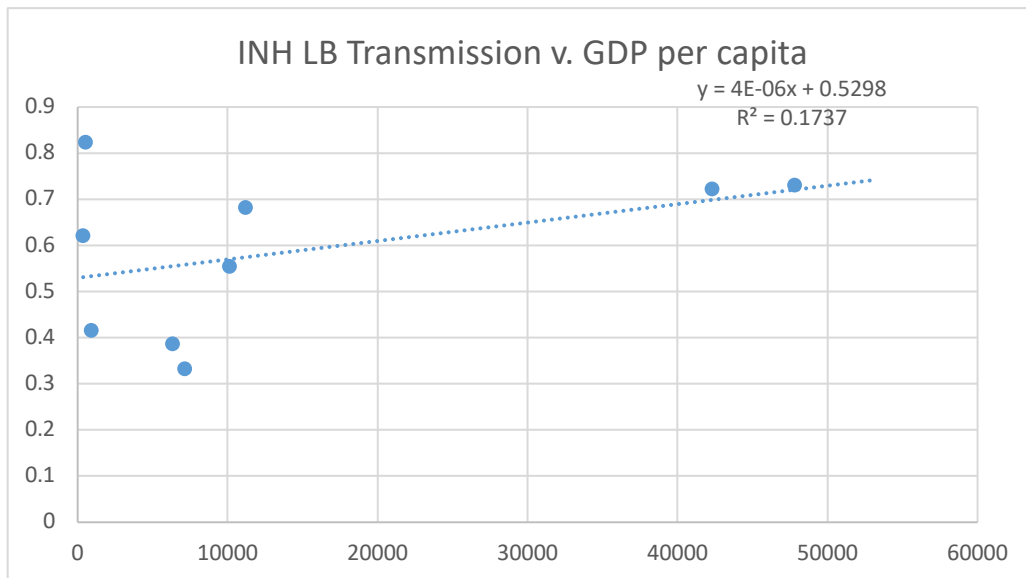

**Supplementary Table 9** Country, lineage, median MRSCA, and number of isolates for groups that provide evidence of RIF and ETH ordering (green highlighting indicates groups that provide evidence of RIF ordered before ETH)

| country      | lineage | RIF MRSCA (number of isolates) | ETH MRSCA (number of isolates) |
|--------------|---------|--------------------------------|--------------------------------|
| China        | 2       | 15.5 (IQR 12.5 – 18.8, n=81)   | 10.4 (IQR 8.6 – 13.5, n=28)    |
| China        | 4       | 19.4 (IQR 17.1 – 20.7, n=20)   | 15.3 (IQR 14.1 – 16.4, n=2)    |
| Peru         | 2       | 12.9 (IQR 4.7 – 31.4, n=45)    | 16 (IQR 11.6 – 53.6, n=8)      |
| South Africa | 2       | 3.86 (IQR 2.4 – 5.2, n=60)     | 1.86 (IQR 1.3 – 2.6, n=27)     |
| Russia       | 4       | 5.7 (IQR 3.9 – 10.2, n=71)     | 9.1 (IQR 6.4 – 14.5, n=24)     |
| Peru         | 4       | 6 (IQR 2.3 – 15.4, n=670)      | 2.5 (IQR 1.5 – 7.8, n=128)     |
| South Korea  | 2       | 17.7 (IQR 15.8 – 17.7, n=14)   | 15.5 (IQR 2.3 – 25.5, n=16)    |
| Germany      | 2       | 16 (IQR 9.9 – 17.4, n=7)       | 16 (IQR 12.7 – 19.3, n=2)      |
| South Africa | 4       | 5 (IQR 2.0 – 7.8, n=96)        | 1.3 (IQR 1.0 – 9.7, n=23)      |



**Supplementary Table 10** MRSCA age is not associated with the earliest date of drug introduction into clinical use.

| <b>Drug</b> | <b>Median MRSCA</b>   | <b>Date Introduced Years ago</b> |
|-------------|-----------------------|----------------------------------|
| <b>INH</b>  | 11.4 (IQR 6.3 – 16.2) | 67                               |
| <b>RIF</b>  | 7.61 (IQR 3.0 – 16.0) | 54                               |
| <b>PZA</b>  | 3.56 (IQR 2.0 – 8.8)  | 67                               |
| <b>FLQ</b>  | 4.81 (IQR 1.8 – 10.5) | 34                               |
| <b>STR</b>  | 7.67 (IQR 3.4 – 13.0) | 75                               |
| <b>SLIs</b> | 4.02 (IQR 1.9 – 8.3)  | 61                               |
| <b>EMB</b>  | 5.01 (IQR 2.1 – 12.5) | 54                               |
| <b>ETH</b>  | 4.01 (IQR 1.6 – 12.2) | 59                               |
| <b>CYS</b>  | 2.05 (IQR 1.5 – 9.0)  | 64                               |

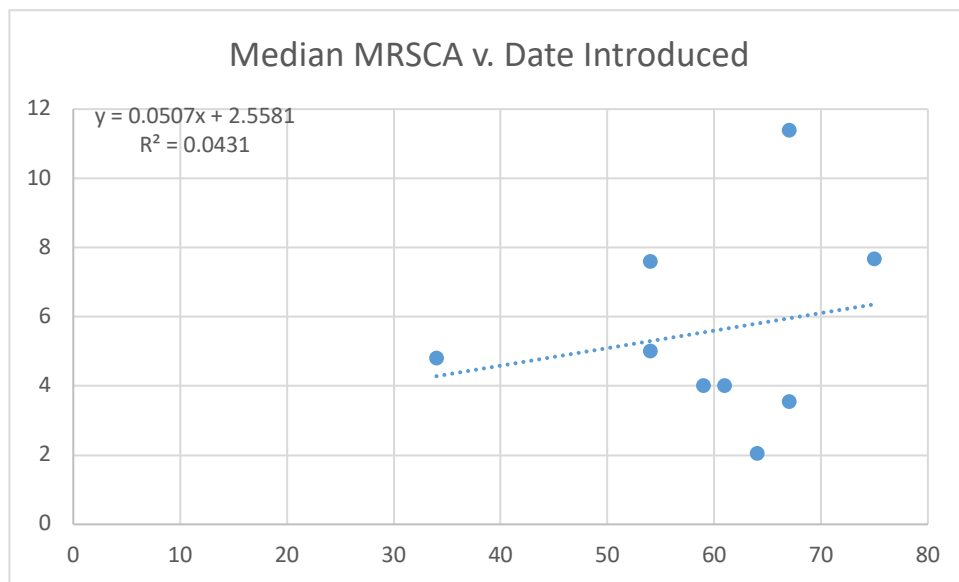

**Supplementary Table 11 Dates Drugs Introduced**

| <b>Drug</b>            | <b>Year Introduced</b> |
|------------------------|------------------------|
| Isoniazid(28)          | 1952                   |
| Rifampicin(28)         | 1965                   |
| Pyrazinamide(29)       | 1952                   |
| Streptomycin(28)       | 1944                   |
| Ethambutol(28)         | 1965                   |
| Ethionamide(28)        | 1960                   |
| Kanamycin/amikacin(28) | 1958                   |
| Cycloserine(28)        | 1955                   |
| Capreomycin(28)        | 1967                   |
| PAS(28)                | 1944                   |
| Ofloxacin(30)          | 1985                   |
| Moxifloxacin(30)       | 1999                   |
| Ciprofloxacin(30)      | 1986                   |

**Supplementary Table 12 Pairwise Country MRSCA date comparison**

Dark red indicates P-value <0.001 (Bonferroni threshold); pink indicates P-value <0.01; white indicates P-value ≥0.01. Number of datapoints in each comparison indicated in parenthesis. \*No PZA resistance phenotypes was available on Chinese isolates.

| <b>INH</b>   | Peru | South Africa | China        | UK           | Russia       |
|--------------|------|--------------|--------------|--------------|--------------|
| Peru         |      | 6 E-9 (214)  | 0.1 (137)    | 0.2 (220)    | 9 E-5 (143)  |
| South Africa |      |              | 7 E-29 (279) | 2 E-32 (362) | 3 E-7 (285)  |
| China        |      |              |              | 0.2 (285)    | 4 E-17 (208) |
| UK           |      |              |              |              | 5 E-15 (291) |
| Russia       |      |              |              |              |              |

| <b>FLQ</b>   | Peru | South Africa | China        | UK           | Russia      |
|--------------|------|--------------|--------------|--------------|-------------|
| Peru         |      | 0.3 (196)    | 6 E-10 (112) | 1 E-6 (105)  | 1 E-4 (87)  |
| South Africa |      |              | 2 E-19 (172) | 1 E-15 (165) | 2 E-7 (147) |
| China        |      |              |              | 0.04 (81)    | 0.6 (63)    |
| UK           |      |              |              |              | 0.7 (56)    |
| Russia       |      |              |              |              |             |

| <b>SLIs</b>  | Peru | South Africa | China        | UK          | Russia     |
|--------------|------|--------------|--------------|-------------|------------|
| Peru         |      | 0.5 (443)    | 5 E-8 (287)  | 5 E-5 (269) | 0.2 (263)  |
| South Africa |      |              | 5 E-12 (228) | 9 E-8 (210) | 0.5 (204)  |
| China        |      |              |              | 0.8 (54)    | 2 E-4 (48) |
| UK           |      |              |              |             | 1 E-3 (30) |
| Russia       |      |              |              |             |            |

| <b>RIF</b>   | Peru | South Africa | China        | UK           | Russia       |
|--------------|------|--------------|--------------|--------------|--------------|
| Peru         |      | 4 E-4 (882)  | 1 E-14 (816) | 2 E-8 (789)  | 0.9 (786)    |
| South Africa |      |              | 6 E-31 (268) | 1 E-20 (241) | 1 E-3 (238)  |
| China        |      |              |              | 0.02 (175)   | 3 E-17 (172) |
| UK           |      |              |              |              | 3 E-11 (145) |
| Russia       |      |              |              |              |              |

| <b>PZA*</b>  | Peru | South Africa | China | UK           | Russia      |
|--------------|------|--------------|-------|--------------|-------------|
| Peru         |      | 0.01 (343)   |       | 1 E-8 (304)  | 1 E-4 (303) |
| South Africa |      |              |       | 2 E-11 (111) | 4 E-3 (110) |
| China        |      |              |       |              |             |
| UK           |      |              |       |              | 3 E-4 (71)  |
| Russia       |      |              |       |              |             |

| <b>EMB</b>   | Peru | South Africa | China        | UK           | Russia      |
|--------------|------|--------------|--------------|--------------|-------------|
| Peru         |      | 2 E-9 (481)  | 1 E-7 (453)  | 7 E-6 (430)  | 0.9 (429)   |
| South Africa |      |              | 2 E-17 (144) | 1 E-12 (121) | 1 E-6 (120) |
| China        |      |              |              | 0.4 (93)     | 3 E-7 (92)  |
| UK           |      |              |              |              | 3 E-6 (69)  |
| Russia       |      |              |              |              |             |

Supplementary Table 13 GDP Per Capita Verses Median MRSCA date for INH, RIF, SLIs, and FLQ.

| Countries      | GDP per capita | Median MRSCA Date INH (Years Ago) | Median MRSCA Date RIF (Years Ago) | Median MRSCA Date SLIs (Years Ago) | Median MRSCA Date FLQ (Years Ago) |
|----------------|----------------|-----------------------------------|-----------------------------------|------------------------------------|-----------------------------------|
| China          | 10150          | 16.2 (IQR 13.0 – 19.3)            | 16.1 (IQR 12.7– 19.3)             | 9.9 (IQR 7.8 – 13.6)               | 12.8 (IQR 10.4 – 15.8)            |
| Peru           | 7140           | 19.0 (IQR 7.8 – 25.8)             | 6.5 (IQR 2.4 – 16.0)              | 2.6 (IQR 1.6 – 7.6)                | 2.4 (IQR 1.2 – 8.2)               |
| Russia         | 11190          | 9.3 (IQR 6.1 – 12.2)              | 5.7 (IQR 3.9 – 10.2)              | 3.0 (IQR 2.7 – 6.5)                | 12.2 (IQR 5.1 - 21.3)             |
| South Africa   | 6330           | 5.6 (IQR 3.9 – 8.7)               | 4.6 (IQR 2.5 – 6.8)               | 4.0 (IQR 1.9 – 5.6)                | 2.1 (IQR 1.4 – 3.3)               |
| United Kingdom | 42310          | 14.8 (IQR 11.4 – 19.5)            | 13.0 (IQR 10.7 – 19.0)            | 10.6 (IQR 7.3 – 11.2)              | 8.4 (IQR 6.7 – 18.4)              |
| Uzbekistan     | 1480           |                                   |                                   | 2.5 (IQR 1.1 – 14.0)               |                                   |
| Romania        | 12510          |                                   |                                   | 11.7 (IQR 3.1 – 18.3)              | 10.2 (IQR 3.1 – 13.9)             |
| Mali           | 933.88         | 5.0 (IQR 5.0 – 10.5)              | 3.4 (IQR 3.2 – 3.4)               |                                    |                                   |
| Netherlands    | 53020          | 11.6 (IQR 6.2 – 13.7)             |                                   |                                    |                                   |
| Moldova        | 3400           |                                   | 3.8 (IQR 3.1 – 4.2)               |                                    |                                   |
| Malawi         | 366.53         | 9.7 (IQR 7.9 – 13.4)              | 6.6 (IQR 5.5 – 6.6)               |                                    |                                   |
| South Korea    | 31940          |                                   | 17.7 (IQR 15.8 – 17.7)            | 16.1 (IQR 16.0 – 19.7)             | 12.0 (IQR 8.9 – 21.0)             |
| Sierra Leone   | 516.76         | 6.9 (IQR 5.3 – 14.6)              | 5.2 (IQR 3.6 – 11.3)              |                                    |                                   |
| Germany        | 47790          | 12.5 (IQR 6.1 – 16.1)             | 13.9 (IQR 8.5 – 17.4)             |                                    |                                   |
| India          | 2200           |                                   | 11.3 (IQR 11.2 – 13.8)            |                                    |                                   |

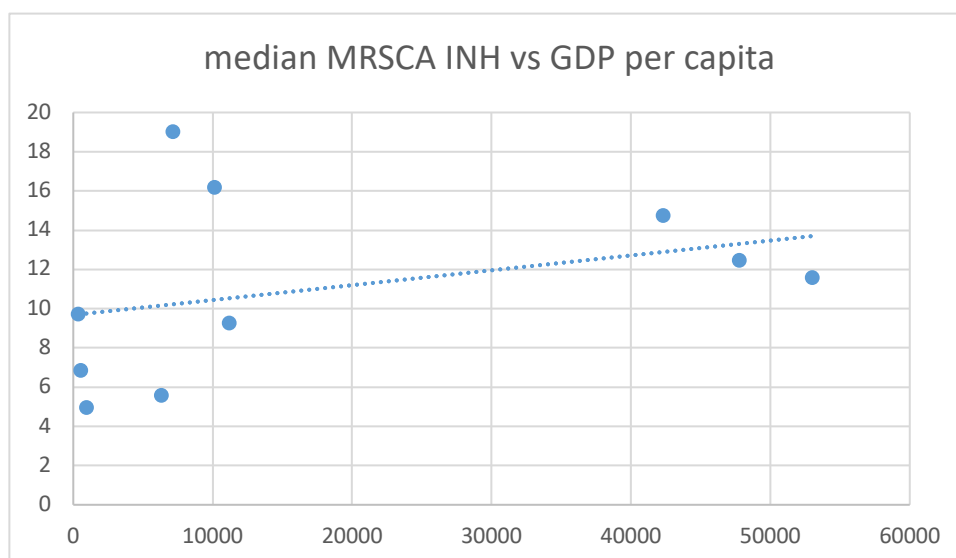

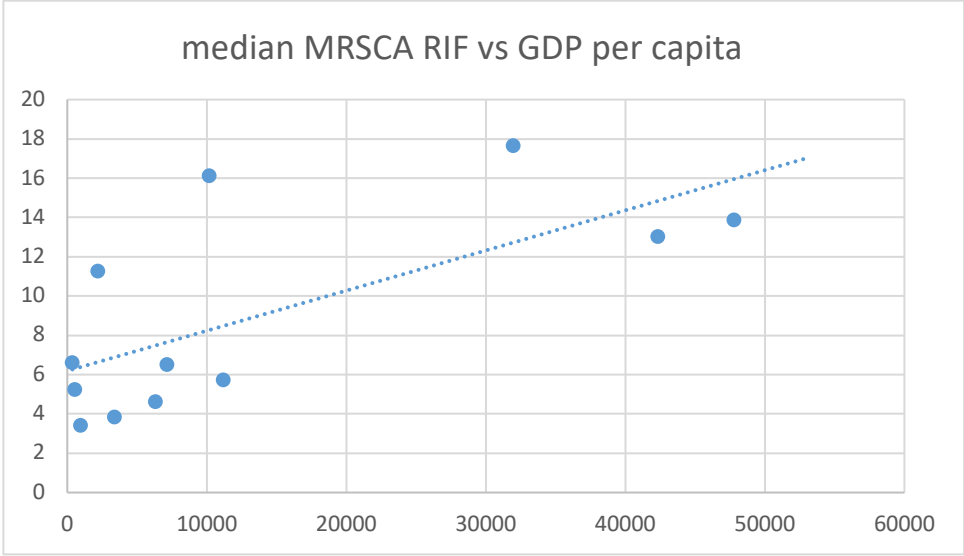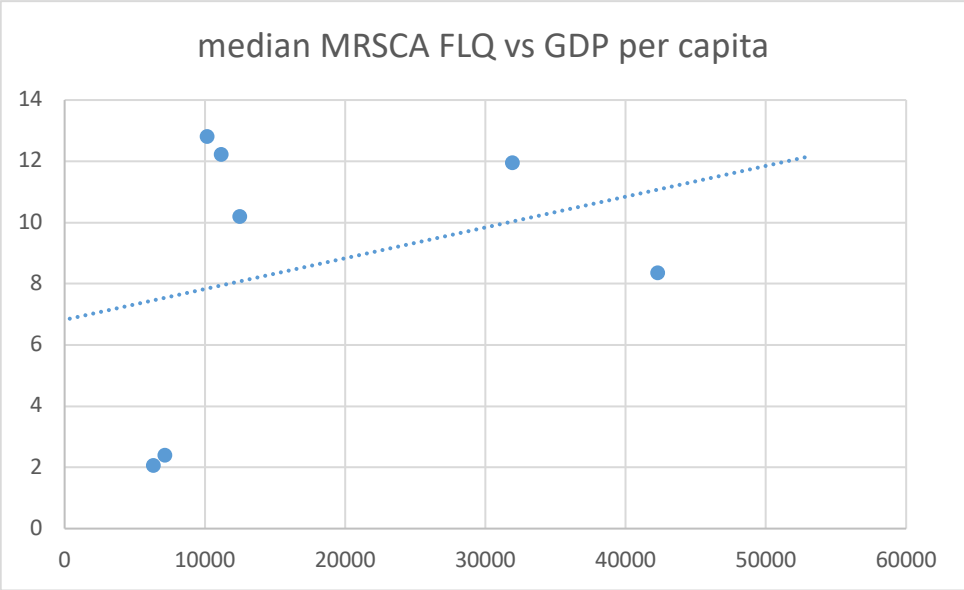

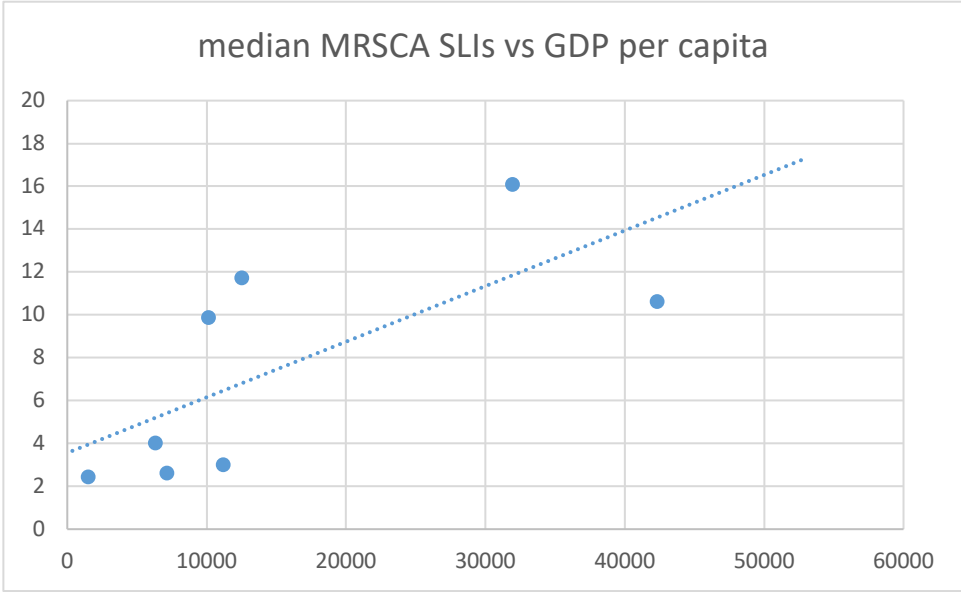

**Supplementary Table 14** Geographic variance of resistance mutations

**A: *katG* S315T mutation prevalence among INH resistant isolates in Russia versus Peru (Fisher P-value  $1 \times 10^{-12}$ )**

|                    | Russia | Peru |
|--------------------|--------|------|
| <b>Mutation</b>    | 444    | 510  |
| <b>No Mutation</b> | 82     | 250  |

**B: *fabG/inhA*-15 C>T mutation prevalence among INH resistant isolates in Russia versus Peru (Fisher P-value  $7 \times 10^{-9}$ )**

|                    | Russia | Peru |
|--------------------|--------|------|
| <b>Mutation</b>    | 43     | 149  |
| <b>No Mutation</b> | 483    | 611  |

**C: 25 mutations that varied geographically to a larger extent than the mutation *fabG/inhA* promoter -15C>T (SD 10%, Range 0%-39%), their standard deviations, and ranges.**

| Mutation                         | Standard Deviation | Range of observed frequency across countries |
|----------------------------------|--------------------|----------------------------------------------|
| INH_SNP_CN_2155168_CG_katG_S315T | 12.49%             | 54.55%-93.75%                                |
| INH_SNP_CN_4247429_AG_embB_M306V | 12.03%             | 0.0%-43.56%                                  |
| INH_SNP_CN_4247431_GA_embB_M306I | 11.88%             | 0.0%-42.63%                                  |
| INH_SNP_CN_4247431_GC_embB_M306I | 11.88%             | 0.0%-42.63%                                  |
| PZA_SNP_CN_2289073_GC_pncA_H57D  | 15.07%             | 0.0%-46.67%                                  |
| EMB_SNP_CN_4247429_AG_embB_M306V | 12.48%             | 8.33%-53.37%                                 |
| EMB_SNP_CN_4247431_GA_embB_M306I | 11.95%             | 9.02%-49.58%                                 |
| EMB_SNP_CN_4247431_GC_embB_M306I | 11.95%             | 9.02%-49.58%                                 |



|                                    |        |               |
|------------------------------------|--------|---------------|
| EMB_SNP_CN_4247431_GT_embB_M306I   | 11.95% | 9.02%-49.58%  |
| STR_SNP_CN_781687_AG_rpsL_K43R     | 21.03% | 0.0%-81.85%   |
| STR_SNP_N_1472359_A514C_rrs        | 12.00% | 0.0%-50.4%    |
| STR_SNP_N_1473246_A1401G_rrs       | 17.90% | 0.0%-60.0%    |
| STR_SNP_CN_4407927_TG_gid_E92D     | 31.17% | 0.0%-87.95%   |
| STR_SNP_N_1472362_C517T_rrs        | 11.32% | 0.0%-38.89%   |
| STR_SNP_CN_4407967_AG_gid_L79S     | 20.81% | 0.0%-72.73%   |
| ETH_SNP_P_1673425_CT.15_fabG1.inhA | 14.48% | 27.78%-62.5%  |
| ETH_SNP_CN_4326333_CG_ethA_A381P   | 19.24% | 0.0%-48.44%   |
| ETH_SNP_CN_1674481_TG_inhA_S94A    | 11.89% | 0.0%-31.46%   |
| KAN_SNP_N_1473246_A1401G_rrs       | 14.83% | 45.65%-85.71% |
| CAP_SNP_N_1473246_A1401G_rrs       | 19.62% | 23.08%-85.84% |
| AMK_SNP_N_1473246_A1401G_rrs       | 20.11% | 46.43%-100.0% |
| AMK_SNP_N_1472359_A514C_rrs        | 20.90% | 0.0%-64.0%    |
| CIP_SNP_CN_7582_AG_gyrA_D94G       | 26.57% | 16.67%-78.26% |
| OFLX_SNP_CN_7582_AG_gyrA_D94G      | 12.60% | 8.33%-50.0%   |
| OFLX_SNP_CN_7570_CT_gyrA_A90V      | 11.83% | 5.45%-46.15%  |

**D: Six mutations that varied by lineage to a larger extent than the mutation *fabG/inhA* promoter -15C>T (SD 9.3%, Range 8.8%-33%), their standard deviations, and ranges.**

| <b>Mutation</b>                      | <b>Standard Deviation</b> | <b>Range of observed frequency across lineages</b> |
|--------------------------------------|---------------------------|----------------------------------------------------|
| INH_SNP_CN_2155168_CG_kat<br>G_S315T | 16.00%                    | 40.28%-84.23%                                      |
| INH_SNP_CN_2518919_GA_kas<br>A_G269S | 11.11%                    | 0.0%-25.66%                                        |
| PZA_SNP_CN_2288952_CT_pnc<br>A_G97D  | 11.74%                    | 0.0%-27.27%                                        |
| EMB_SNP_CN_4247429_AG_e<br>mbB_M306V | 13.65%                    | 18.87%-53.85%                                      |
| STR_SNP_CN_781687_AG_rpsL<br>_K43R   | 20.23%                    | 4.76%-57.36%                                       |
| STR_SNP_CN_4407927_TG_gid<br>_E92D   | 43.23%                    | 0.0%-99.83%                                        |

**Supplementary Table 15 Sensitivity and Specificity of commercial tests, RF-select, and DA-select for INH, RIF, SLIS, and FLQ in five countries with the largest number of phenotyped strains: Russia, South Africa, Peru, Uzbekistan, and United Kingdom**

**Legend: Sensitivity (Percent of resistant isolates classified as resistant), Specificity (Percent of susceptible isolates classified as susceptible)**

| Drug | <u>commercial test-Peru</u> |               | <u>commercial test-Russia</u> |               | <u>commercial test-South Africa</u> |               | <u>commercial test-Uzbekistan</u> |                | <u>commercial test-UnitedKingdom</u> |                 |
|------|-----------------------------|---------------|-------------------------------|---------------|-------------------------------------|---------------|-----------------------------------|----------------|--------------------------------------|-----------------|
|      | Sensitivity                 | Specificity   | Sensitivity                   | Specificity   | Sensitivity                         | Specificity   | Sensitivity                       | Specificity    | Sensitivity                          | Specificity     |
| INH  | 84% (641/760)               | 90% (151/168) | 87% (459/526)                 | 91% (281/310) | 88% (168/190)                       | 72% (444/619) | 90% (238/264)                     | NA 0/0         | 87% (245/283)                        | 99% (1559/1567) |
| RIF  | 90% (623/692)               | 89% (209/236) | 82% (347/425)                 | 88% (363/412) | 95% (158/166)                       | 70% (433/616) | 95% (248/262)                     | 50% (1/2)      | 91% (86/95)                          | 99% (1742/1750) |
| FLQ  | 38% (46/121)                | 98% (788/801) | 38% (51/133)                  | 94% (275/292) | 77% (86/111)                        | 87% (510/585) | 0% (0/7)                          | 100% (213/213) | 90% (26/29)                          | 98% (295/301)   |
| SLI  | 47% (101/214)               | 98%(692/708)  | 77% (63/82)                   | 48%(163/343)  | 77% (101/131)                       | 91%(486/536)  | 79% (44/56)                       | 66% (109/164)  | 90% (9/10)                           | 100%(83/83)     |

| Drug | <u>RF-select WGS test - Peru</u> |               | <u>RF-select WGS test-Russia</u> |               | <u>RF-select WGS test -South Africa</u> |               | <u>RF-select WGS test-Uzbekistan</u> |                | <u>RF-select WGS test-UnitedKingdom</u> |                 |
|------|----------------------------------|---------------|----------------------------------|---------------|-----------------------------------------|---------------|--------------------------------------|----------------|-----------------------------------------|-----------------|
|      | Sensitivity                      | Specificity   | Sensitivity                      | Specificity   | Sensitivity                             | Specificity   | Sensitivity                          | Specificity    | Sensitivity                             | Specificity     |
| INH  | 91% (692/760)                    | 86% (144/168) | 88% (463/526)                    | 91% (281/310) | 90% (171/190)                           | 71% (438/619) | 94% (248/264)                        | NA 0/0         | 90% (255/283)                           | 98% (1537/1567) |
| RIF  | 91% (629/692)                    | 89% (210/236) | 82% (350/425)                    | 88% (363/412) | 96% (159/166)                           | 70% (432/616) | 96% (252/262)                        | 50% (1/2)      | 100% (95/95)                            | 98% (1722/1750) |
| FLQ  | 35% (42/121)                     | 99% (795/801) | 36% (48/133)                     | 95% (276/292) | 78% (87/111)                            | 88% (512/585) | 0% (0/7)                             | 100% (213/213) | 90% (26/29)                             | 98% (296/301)   |
| SLI  | 50% (105/214)                    | 97%(686/708)  | 77% (63/82)                      | 45%(156/343)  | 78% (102/131)                           | 90%(482/536)  | 77% (43/56)                          | 65% (106/164)  | 90% (9/10)                              | 94%(78/83)      |

| Drug | <u>DA-select WGS test - Peru</u> |               | <u>DA-select WGS test-Russia</u> |               | <u>DA-select WGS test -South Africa</u> |               | <u>DA-select WGS test-Uzbekistan</u> |                | <u>DA-select WGS test-UnitedKingdom</u> |                 |
|------|----------------------------------|---------------|----------------------------------|---------------|-----------------------------------------|---------------|--------------------------------------|----------------|-----------------------------------------|-----------------|
|      | Sensitivity                      | Specificity   | Sensitivity                      | Specificity   | Sensitivity                             | Specificity   | Sensitivity                          | Specificity    | Sensitivity                             | Specificity     |
| INH  | 92% (698/760)                    | 88% (147/168) | 88% (463/526)                    | 90% (280/310) | 92% (175/190)                           | 71% (438/619) | 98% (258/264)                        | NA 0/0         | 94% (267/283)                           | 98% (1537/1567) |
| RIF  | 91% (633/692)                    | 89% (210/236) | 82% (350/425)                    | 88% (363/412) | 96% (159/166)                           | 70% (431/616) | 97% (253/262)                        | 50% (1/2)      | 100% (95/95)                            | 98% (1722/1750) |
| FLQ  | 33% (40/121)                     | 99% (796/801) | 36% (48/133)                     | 95% (277/292) | 78% (87/111)                            | 88% (513/585) | 0% (0/7)                             | 100% (213/213) | 97% (28/29)                             | 98% (296/301)   |
| SLI  | 46% (98/214)                     | 96%(681/708)  | 70% (57/82)                      | 51%(174/343)  | 79% (103/131)                           | 90%(482/536)  | 73% (41/56)                          | 85% (140/164)  | 80% (8/10)                              | 90%(75/83)      |

### Supplementary Table 16 Resistance Mutation Counts Per Country and Per Isolate Phenotype

Amikacin (AMK) Data, Abbreviations: counts = how many isolates had this mutation, no\_data = how many isolates had this mutation but no data on whether they were phenotypically resistant or not to AMK, susceptible = how many isolates had this mutation but were phenotypically susceptible to AMK, resistant = how many isolates had this mutation but were resistant to AMK

| country                          | AMK_SNP_N_1472359_A514C_rrs | AMK_SNP_N_1473246_A1401G_rrs | AMK_othersnp | AMK_rrs_A906G_u | AMK_rrs_C517T_u | AMK_rrs_G1484T_u | AMK_unknown |
|----------------------------------|-----------------------------|------------------------------|--------------|-----------------|-----------------|------------------|-------------|
| Azerbaijan                       | 0                           | 0                            | 0            | 0               | 0               | 0                | 0           |
| Bangladesh                       | 0                           | 0                            | 0            | 0               | 0               | 0                | 0           |
| Belarus                          | 20                          | 51                           | 0            | 0               | 0               | 0                | 0           |
| Brazil                           | 0                           | 0                            | 0            | 0               | 0               | 0                | 0           |
| Burma                            | 0                           | 0                            | 0            | 0               | 0               | 0                | 0           |
| Canada                           | 0                           | 0                            | 0            | 0               | 0               | 0                | 0           |
| China                            | 10                          | 14                           | 0            | 0               | 0               | 0                | 0           |
| Colombia                         | 0                           | 1                            | 0            | 0               | 0               | 0                | 0           |
| Democratic Republic of the Congo | 0                           | 0                            | 0            | 0               | 0               | 0                | 0           |
| Denmark                          | 0                           | 0                            | 0            | 0               | 0               | 0                | 0           |
| Djibouti                         | 0                           | 0                            | 0            | 0               | 0               | 0                | 0           |
| Dominican Republic               | 0                           | 0                            | 0            | 0               | 0               | 0                | 0           |
| Estonia                          | 0                           | 0                            | 0            | 0               | 0               | 0                | 0           |
| Georgia                          | 0                           | 3                            | 0            | 0               | 0               | 0                | 0           |
| Germany                          | 3                           | 3                            | 0            | 0               | 0               | 0                | 1           |
| Guinea                           | 0                           | 0                            | 0            | 0               | 0               | 0                | 0           |
| India                            | 0                           | 0                            | 0            | 0               | 0               | 0                | 0           |
| Indonesia                        | 0                           | 0                            | 0            | 0               | 0               | 0                | 0           |
| Iran                             | 1                           | 3                            | 0            | 0               | 0               | 0                | 0           |
| Kazakhstan                       | 0                           | 0                            | 0            | 0               | 0               | 0                | 0           |
| Malawi                           | 0                           | 0                            | 0            | 0               | 0               | 0                | 0           |
| Mali                             | 1                           | 0                            | 0            | 0               | 0               | 0                | 0           |
| Moldova                          | 0                           | 0                            | 0            | 0               | 0               | 0                | 0           |
| Morocco                          | 0                           | 0                            | 0            | 0               | 0               | 0                | 0           |
| Nepal                            | 1                           | 0                            | 0            | 0               | 0               | 0                | 0           |
| Netherlands                      | 1                           | 0                            | 0            | 0               | 0               | 0                | 0           |
| Nigeria                          | 0                           | 0                            | 0            | 0               | 0               | 0                | 0           |
| Not Provided                     | 39                          | 160                          | 5            | 0               | 8               | 4                | 100         |
| Pakistan                         | 0                           | 0                            | 0            | 0               | 0               | 0                | 0           |
| Peru                             | 14                          | 110                          | 6            | 3               | 0               | 0                | 48          |
| Philippines                      | 0                           | 0                            | 0            | 0               | 0               | 0                | 0           |
| Portugal                         | 0                           | 0                            | 0            | 0               | 0               | 0                | 0           |
| Romania                          | 2                           | 12                           | 0            | 0               | 0               | 0                | 0           |
| Russia                           | 17                          | 35                           | 0            | 0               | 14              | 1                | 15          |
| Rwanda                           | 0                           | 2                            | 0            | 0               | 0               | 0                | 0           |
| Sierra Leone                     | 0                           | 0                            | 0            | 0               | 0               | 0                | 0           |
| South Africa                     | 83                          | 164                          | 0            | 0               | 0               | 0                | 11          |
| South Korea                      | 2                           | 26                           | 0            | 1               | 0               | 0                | 23          |
| Spain                            | 0                           | 0                            | 0            | 0               | 0               | 0                | 0           |
| Swaziland                        | 0                           | 0                            | 0            | 0               | 0               | 0                | 0           |
| Thailand                         | 0                           | 0                            | 0            | 0               | 0               | 0                | 0           |
| Turkmenistan                     | 0                           | 0                            | 0            | 0               | 0               | 0                | 0           |
| Uganda                           | 0                           | 1                            | 0            | 0               | 0               | 0                | 0           |
| United Kingdom                   | 16                          | 8                            | 0            | 0               | 0               | 0                | 0           |
| Uzbekistan                       | 13                          | 46                           | 1            | 0               | 0               | 0                | 15          |
| Vietnam                          | 0                           | 0                            | 0            | 0               | 0               | 0                | 0           |

| <b>resistance mutation</b>   | <b>counts</b> | <b>no_data</b> | <b>susceptible</b> | <b>resistant</b> |
|------------------------------|---------------|----------------|--------------------|------------------|
| AMK_SNP_N_1473246_A1401G_rrs | 639           | 208            | 45                 | 386              |
| AMK_SNP_N_1472359_A514C_rrs  | 223           | 84             | 38                 | 101              |
| AMK_unknown                  | 213           | 0              | 0                  | 213              |
| AMK_rrs_C517T_u              | 22            | 0              | 0                  | 22               |
| AMK_rrs_G1484T_u             | 5             | 0              | 0                  | 5                |
| AMK_rrs_A906G_u              | 4             | 0              | 0                  | 4                |
| AMK_rrs_C513T_u              | 4             | 0              | 0                  | 4                |
| AMK_rrs_A1461G_u             | 1             | 0              | 0                  | 1                |
| AMK_rrs_A908C_u              | 1             | 0              | 0                  | 1                |
| AMK_rrs_C1105G_u             | 1             | 0              | 0                  | 1                |
| AMK_rrs_C1402T_u             | 1             | 0              | 0                  | 1                |
| AMK_rrs_C799A_u              | 1             | 0              | 0                  | 1                |
| AMK_rrs_C905A_u              | 1             | 0              | 0                  | 1                |
| AMK_rrs_C905G_u              | 1             | 0              | 0                  | 1                |
| AMK_rrs_G878A_u              | 1             | 0              | 0                  | 1                |

Capreomycin (CAP) Data, Abbreviations: counts = how many isolates had this mutation, no\_data = how many isolates had this mutation but no data on whether they were phenotypically resistant or not to CAP, susceptible = how many isolates had this mutation but were phenotypically susceptible to CAP, resistant = how many isolates had this mutation but were resistant to CAP

| country                          | CAP SNP N 1472753 A908C rrs | CAP SNP N 1473246 A1401G rrs | CAP othersnp | CAP rrs A514C u | CAP rrs C517T u | CAP rrs G1484T u | CAP unknown |
|----------------------------------|-----------------------------|------------------------------|--------------|-----------------|-----------------|------------------|-------------|
| Azerbaijan                       | 0                           | 0                            | 0            | 0               | 0               | 0                | 0           |
| Bangladesh                       | 0                           | 0                            | 0            | 0               | 0               | 0                | 0           |
| Belarus                          | 0                           | 51                           | 0            | 0               | 0               | 0                | 0           |
| Brazil                           | 0                           | 0                            | 0            | 0               | 0               | 0                | 0           |
| Burma                            | 0                           | 0                            | 0            | 0               | 0               | 0                | 0           |
| Canada                           | 0                           | 0                            | 0            | 0               | 0               | 0                | 0           |
| China                            | 0                           | 14                           | 0            | 1               | 1               | 0                | 9           |
| Colombia                         | 0                           | 1                            | 0            | 0               | 0               | 0                | 0           |
| Democratic Republic of the Congo | 0                           | 0                            | 0            | 0               | 0               | 0                | 0           |
| Denmark                          | 0                           | 0                            | 0            | 0               | 0               | 0                | 0           |
| Djibouti                         | 0                           | 0                            | 0            | 0               | 0               | 0                | 0           |
| Dominican Republic               | 0                           | 0                            | 0            | 0               | 0               | 0                | 0           |
| Estonia                          | 0                           | 0                            | 0            | 0               | 0               | 0                | 0           |
| Georgia                          | 0                           | 3                            | 0            | 0               | 0               | 0                | 0           |
| Germany                          | 0                           | 3                            | 0            | 0               | 0               | 0                | 1           |
| Guinea                           | 0                           | 0                            | 0            | 0               | 0               | 0                | 0           |
| India                            | 0                           | 0                            | 0            | 0               | 0               | 0                | 0           |
| Indonesia                        | 0                           | 0                            | 0            | 0               | 0               | 0                | 0           |
| Iran                             | 0                           | 3                            | 0            | 0               | 0               | 0                | 0           |
| Kazakhstan                       | 0                           | 0                            | 0            | 0               | 0               | 0                | 0           |
| Malawi                           | 0                           | 0                            | 0            | 0               | 0               | 0                | 0           |
| Mali                             | 0                           | 0                            | 0            | 0               | 0               | 0                | 0           |
| Moldova                          | 0                           | 0                            | 0            | 0               | 0               | 0                | 0           |
| Morocco                          | 0                           | 0                            | 0            | 0               | 0               | 0                | 0           |
| Nepal                            | 0                           | 0                            | 0            | 0               | 0               | 0                | 0           |
| Netherlands                      | 0                           | 0                            | 0            | 0               | 0               | 0                | 0           |
| Nigeria                          | 0                           | 0                            | 0            | 0               | 0               | 0                | 0           |
| Not Provided                     | 2                           | 160                          | 7            | 1               | 0               | 7                | 53          |
| Pakistan                         | 0                           | 0                            | 0            | 0               | 0               | 0                | 0           |
| Peru                             | 3                           | 110                          | 13           | 4               | 0               | 0                | 87          |
| Philippines                      | 0                           | 0                            | 0            | 0               | 0               | 0                | 0           |
| Portugal                         | 0                           | 0                            | 0            | 0               | 0               | 0                | 0           |
| Romania                          | 1                           | 12                           | 0            | 0               | 0               | 0                | 0           |
| Russia                           | 1                           | 35                           | 0            | 0               | 21              | 1                | 20          |
| Rwanda                           | 0                           | 2                            | 0            | 0               | 0               | 0                | 0           |
| Sierra Leone                     | 0                           | 0                            | 0            | 0               | 0               | 0                | 0           |
| South Africa                     | 0                           | 164                          | 0            | 1               | 0               | 0                | 15          |
| South Korea                      | 0                           | 26                           | 1            | 0               | 0               | 0                | 9           |
| Spain                            | 0                           | 0                            | 0            | 0               | 0               | 0                | 0           |
| Swaziland                        | 0                           | 0                            | 0            | 0               | 0               | 0                | 0           |
| Thailand                         | 0                           | 0                            | 0            | 0               | 0               | 0                | 0           |
| Turkmenistan                     | 0                           | 0                            | 0            | 0               | 0               | 0                | 0           |
| Uganda                           | 4                           | 1                            | 0            | 0               | 0               | 0                | 0           |
| United Kingdom                   | 0                           | 8                            | 0            | 0               | 0               | 0                | 1           |
| Uzbekistan                       | 0                           | 46                           | 2            | 1               | 0               | 0                | 13          |
| Vietnam                          | 0                           | 0                            | 0            | 0               | 0               | 0                | 0           |

| <b>resistance mutation</b>   | <b>counts</b> | <b>no_data</b> | <b>susceptible</b> | <b>resistant</b> |
|------------------------------|---------------|----------------|--------------------|------------------|
| CAP SNP N 1473246 A1401G rrs | 639           | 167            | 127                | 345              |
| CAP unknown                  | 208           | 0              | 0                  | 208              |
| CAP rrs C517T u              | 22            | 0              | 0                  | 22               |
| CAP SNP N 1472753 A908C rrs  | 11            | 4              | 7                  | 0                |
| CAP rrs A514C u              | 8             | 0              | 0                  | 8                |
| CAP rrs G1484T u             | 8             | 0              | 0                  | 8                |
| CAP rrs A906G u              | 5             | 0              | 0                  | 5                |
| CAP rrs C513T u              | 5             | 0              | 0                  | 5                |
| CAP rrs C1402T u             | 4             | 0              | 0                  | 4                |
| CAP rrs C1105G u             | 1             | 0              | 0                  | 1                |
| CAP rrs C1390T u             | 1             | 0              | 0                  | 1                |
| CAP rrs C1402A u             | 1             | 0              | 0                  | 1                |
| CAP rrs C239A u              | 1             | 0              | 0                  | 1                |
| CAP rrs C905A u              | 1             | 0              | 0                  | 1                |
| CAP rrs T1322G u             | 1             | 0              | 0                  | 1                |
| CAP rrs T16A u               | 1             | 0              | 0                  | 1                |
| CAP rrs T16C u               | 1             | 0              | 0                  | 1                |
| CAP rrs T556C u              | 1             | 0              | 0                  | 1                |
| CAP SNP N 1473109 T1264G rrs | 0             | 0              | 0                  | 0                |
| CAP SNP N 1473160 G1315A rrs | 0             | 0              | 0                  | 0                |
| CAP SNP N 1473343 G1498T rrs | 0             | 0              | 0                  | 0                |

Ciprofloxacin (CIP) Data, Abbreviations: counts = how many isolates had this mutation, no\_data = how many isolates had this mutation but no data on whether they were phenotypically resistant or not to CIP, susceptible = how many isolates had this mutation but were phenotypically susceptible to CIP, resistant = how many isolates had this mutation but were resistant to CIP

| country                          | CIP_SNP_CN_7570_CT_gyrA_A90V | CIP_SNP_CN_7572_TC_gyrA_S91P | CIP_SNP_CN_7581_GT_gyrA_D94Y | CIP_SNP_CN_7582_AC_gyrA_D94A | CIP_SNP_CN_7582_AG_gyrA_D94G | CIP_othersnp | CIP_unknown |
|----------------------------------|------------------------------|------------------------------|------------------------------|------------------------------|------------------------------|--------------|-------------|
| Azerbaijan                       | 0                            | 0                            | 0                            | 0                            | 0                            | 0            | 0           |
| Bangladesh                       | 0                            | 0                            | 0                            | 0                            | 0                            | 0            | 0           |
| Belarus                          | 23                           | 6                            | 3                            | 11                           | 21                           | 2            | 0           |
| Brazil                           | 0                            | 0                            | 0                            | 0                            | 0                            | 0            | 0           |
| Burma                            | 0                            | 0                            | 0                            | 1                            | 0                            | 0            | 0           |
| Canada                           | 0                            | 0                            | 0                            | 0                            | 0                            | 0            | 0           |
| China                            | 11                           | 4                            | 4                            | 7                            | 18                           | 0            | 0           |
| Colombia                         | 0                            | 0                            | 0                            | 0                            | 0                            | 0            | 0           |
| Democratic Republic of the Congo | 0                            | 0                            | 0                            | 0                            | 0                            | 0            | 0           |
| Denmark                          | 0                            | 0                            | 0                            | 0                            | 0                            | 0            | 0           |
| Djibouti                         | 0                            | 0                            | 0                            | 0                            | 0                            | 0            | 0           |
| Dominican Republic               | 0                            | 0                            | 0                            | 0                            | 0                            | 0            | 0           |
| Estonia                          | 0                            | 0                            | 0                            | 0                            | 1                            | 0            | 0           |
| Georgia                          | 0                            | 0                            | 0                            | 0                            | 0                            | 0            | 0           |
| Germany                          | 0                            | 2                            | 0                            | 1                            | 2                            | 0            | 0           |
| Guinea                           | 0                            | 0                            | 0                            | 0                            | 0                            | 0            | 0           |
| India                            | 2                            | 0                            | 1                            | 0                            | 2                            | 0            | 0           |
| Indonesia                        | 0                            | 0                            | 0                            | 0                            | 0                            | 0            | 0           |
| Iran                             | 3                            | 0                            | 0                            | 1                            | 6                            | 0            | 0           |
| Kazakhstan                       | 0                            | 0                            | 0                            | 0                            | 0                            | 0            | 0           |
| Malawi                           | 0                            | 0                            | 0                            | 0                            | 0                            | 0            | 0           |
| Mali                             | 1                            | 0                            | 0                            | 0                            | 0                            | 0            | 0           |
| Moldova                          | 0                            | 0                            | 0                            | 0                            | 0                            | 1            | 0           |
| Morocco                          | 0                            | 0                            | 0                            | 0                            | 0                            | 0            | 0           |
| Nepal                            | 0                            | 0                            | 0                            | 0                            | 0                            | 0            | 0           |
| Netherlands                      | 0                            | 0                            | 0                            | 0                            | 1                            | 0            | 0           |
| Nigeria                          | 0                            | 0                            | 0                            | 0                            | 0                            | 0            | 0           |
| Not Provided                     | 57                           | 36                           | 13                           | 25                           | 86                           | 11           | 6           |
| Pakistan                         | 1                            | 0                            | 0                            | 0                            | 0                            | 0            | 0           |
| Peru                             | 20                           | 1                            | 2                            | 9                            | 29                           | 7            | 0           |
| Philippines                      | 0                            | 0                            | 0                            | 0                            | 0                            | 0            | 0           |
| Portugal                         | 0                            | 0                            | 0                            | 0                            | 0                            | 0            | 0           |
| Romania                          | 2                            | 0                            | 1                            | 3                            | 1                            | 0            | 0           |
| Russia                           | 10                           | 5                            | 3                            | 12                           | 31                           | 0            | 0           |
| Rwanda                           | 1                            | 0                            | 0                            | 0                            | 0                            | 0            | 0           |
| Sierra Leone                     | 0                            | 0                            | 0                            | 0                            | 0                            | 0            | 0           |
| South Africa                     | 78                           | 4                            | 6                            | 21                           | 44                           | 1            | 0           |
| South Korea                      | 13                           | 3                            | 1                            | 2                            | 14                           | 4            | 22          |
| Spain                            | 0                            | 0                            | 0                            | 0                            | 0                            | 0            | 0           |
| Swaziland                        | 0                            | 0                            | 0                            | 0                            | 0                            | 0            | 0           |
| Thailand                         | 0                            | 0                            | 0                            | 0                            | 0                            | 0            | 0           |
| Turkmenistan                     | 0                            | 0                            | 0                            | 0                            | 0                            | 0            | 0           |
| Uganda                           | 0                            | 1                            | 0                            | 0                            | 0                            | 0            | 0           |
| United Kingdom                   | 7                            | 7                            | 0                            | 1                            | 30                           | 2            | 0           |
| Uzbekistan                       | 0                            | 0                            | 0                            | 0                            | 0                            | 0            | 0           |
| Vietnam                          | 0                            | 0                            | 0                            | 0                            | 0                            | 0            | 0           |



| <b>resistance mutation</b>    | <b>counts</b> | <b>no data</b> | <b>susceptible</b> | <b>resistant</b> |
|-------------------------------|---------------|----------------|--------------------|------------------|
| CIP SNP CN 7582 AG gyrA D94G  | 286           | 249            | 1                  | 36               |
| CIP SNP CN 7570 CT gyrA A90V  | 229           | 201            | 12                 | 16               |
| CIP SNP CN 7582 AC gyrA D94A  | 94            | 92             | 2                  | 0                |
| CIP SNP CN 7572 TC gyrA S91P  | 69            | 63             | 2                  | 4                |
| CIP SNP CN 7581 GT gyrA D94Y  | 34            | 28             | 0                  | 6                |
| CIP unknown                   | 28            | 0              | 0                  | 28               |
| CIP SNP CN 6735 AC gyrB N538T | 10            | 10             | 0                  | 0                |
| CIP SNP CN 7566 GA gyrA D89N  | 6             | 6              | 0                  | 0                |
| CIP gyrA A74S u               | 2             | 0              | 0                  | 2                |
| CIP gyrA D94N u               | 2             | 0              | 0                  | 2                |
| CIP gyrB A471V u              | 2             | 0              | 0                  | 2                |
| CIP gyrB S486F u              | 2             | 0              | 0                  | 2                |
| CIP gyrB T539N u              | 2             | 0              | 0                  | 2                |
| CIP gyrA A288D u              | 1             | 0              | 0                  | 1                |
| CIP gyrA D94H u               | 1             | 0              | 0                  | 1                |

Ethambutol (EMB) Data, Abbreviations: counts = how many isolates had this mutation, no\_data = how many isolates had this mutation but no data on whether they were phenotypically resistant or not to EMB, susceptible = how many isolates had this mutation but were phenotypically susceptible to EMB, resistant = how many isolates had this mutation but were resistant to EMB

| country                          | EMB SNP CN 4242182 GT embC A774S | EMB SNP CN 4247429 AG embB M306V | EMB SNP CN 4247431 GA embB M306I | EMB SNP CN 4247431 GC embB M306I | EMB SNP CN 4247431 GT embB M306I | EMB othersnp | EMB unknown |
|----------------------------------|----------------------------------|----------------------------------|----------------------------------|----------------------------------|----------------------------------|--------------|-------------|
| Azerbaijan                       | 0                                | 0                                | 0                                | 0                                | 0                                | 1            | 0           |
| Bangladesh                       | 0                                | 0                                | 0                                | 0                                | 0                                | 1            | 2           |
| Belarus                          | 0                                | 16                               | 46                               | 46                               | 46                               | 30           | 0           |
| Brazil                           | 0                                | 0                                | 0                                | 0                                | 0                                | 0            | 0           |
| Burma                            | 0                                | 0                                | 1                                | 1                                | 1                                | 1            | 0           |
| Canada                           | 0                                | 0                                | 0                                | 0                                | 0                                | 0            | 0           |
| China                            | 0                                | 28                               | 17                               | 17                               | 17                               | 45           | 5           |
| Colombia                         | 0                                | 0                                | 0                                | 0                                | 0                                | 0            | 0           |
| Democratic Republic of the Congo | 0                                | 0                                | 0                                | 0                                | 0                                | 0            | 0           |
| Denmark                          | 0                                | 0                                | 0                                | 0                                | 0                                | 0            | 0           |
| Djibouti                         | 0                                | 0                                | 0                                | 0                                | 0                                | 0            | 0           |
| Dominican Republic               | 0                                | 0                                | 0                                | 0                                | 0                                | 0            | 0           |
| Estonia                          | 0                                | 2                                | 0                                | 0                                | 0                                | 0            | 0           |
| Georgia                          | 0                                | 0                                | 0                                | 0                                | 0                                | 4            | 0           |
| Germany                          | 3                                | 4                                | 4                                | 4                                | 4                                | 12           | 1           |
| Guinea                           | 0                                | 1                                | 0                                | 0                                | 0                                | 0            | 0           |
| India                            | 0                                | 4                                | 0                                | 0                                | 0                                | 4            | 0           |
| Indonesia                        | 0                                | 0                                | 0                                | 0                                | 0                                | 0            | 0           |
| Iran                             | 0                                | 4                                | 2                                | 2                                | 2                                | 6            | 1           |
| Kazakhstan                       | 0                                | 2                                | 0                                | 0                                | 0                                | 0            | 0           |
| Malawi                           | 2                                | 1                                | 0                                | 0                                | 0                                | 5            | 0           |
| Mali                             | 0                                | 8                                | 4                                | 4                                | 4                                | 3            | 0           |
| Moldova                          | 0                                | 5                                | 5                                | 5                                | 5                                | 11           | 0           |
| Morocco                          | 0                                | 0                                | 0                                | 0                                | 0                                | 1            | 0           |
| Nepal                            | 0                                | 0                                | 0                                | 0                                | 0                                | 0            | 1           |
| Netherlands                      | 0                                | 0                                | 0                                | 0                                | 0                                | 0            | 0           |
| Nigeria                          | 0                                | 0                                | 1                                | 1                                | 1                                | 0            | 0           |
| Not Provided                     | 54                               | 203                              | 135                              | 135                              | 135                              | 280          | 34          |
| Pakistan                         | 0                                | 1                                | 0                                | 0                                | 0                                | 0            | 0           |
| Peru                             | 220                              | 139                              | 178                              | 178                              | 178                              | 367          | 121         |
| Philippines                      | 0                                | 0                                | 0                                | 0                                | 0                                | 0            | 1           |
| Portugal                         | 0                                | 0                                | 1                                | 1                                | 1                                | 0            | 0           |
| Romania                          | 0                                | 6                                | 11                               | 11                               | 11                               | 17           | 0           |
| Russia                           | 0                                | 93                               | 46                               | 46                               | 46                               | 232          | 46          |
| Rwanda                           | 0                                | 1                                | 0                                | 0                                | 0                                | 1            | 1           |
| Sierra Leone                     | 1                                | 1                                | 4                                | 4                                | 4                                | 7            | 2           |
| South Africa                     | 0                                | 139                              | 132                              | 132                              | 132                              | 56           | 6           |
| South Korea                      | 0                                | 11                               | 12                               | 12                               | 12                               | 16           | 4           |
| Spain                            | 0                                | 1                                | 0                                | 0                                | 0                                | 0            | 0           |
| Swaziland                        | 0                                | 0                                | 0                                | 0                                | 0                                | 1            | 0           |
| Thailand                         | 0                                | 0                                | 0                                | 0                                | 0                                | 0            | 0           |
| Turkmenistan                     | 0                                | 1                                | 1                                | 1                                | 1                                | 0            | 0           |
| Uganda                           | 1                                | 7                                | 18                               | 18                               | 18                               | 18           | 1           |
| United Kingdom                   | 10                               | 21                               | 45                               | 45                               | 45                               | 31           | 1           |
| Uzbekistan                       | 0                                | 115                              | 56                               | 56                               | 56                               | 60           | 7           |
| Vietnam                          | 0                                | 0                                | 0                                | 0                                | 0                                | 0            | 0           |

| resistance mutation                                  | counts | no data | susceptible | resistant |
|------------------------------------------------------|--------|---------|-------------|-----------|
| EMB SNP CN 4247429 AG embB M306V                     | 814    | 123     | 185         | 506       |
| EMB SNP CN 4247431 GA embB M306I                     | 719    | 122     | 185         | 412       |
| EMB SNP CN 4247431 GC embB M306I                     | 719    | 122     | 185         | 412       |
| EMB SNP CN 4247431 GT embB M306I                     | 719    | 122     | 185         | 412       |
| EMB SNP CN 4242182 GT embC A774S                     | 291    | 33      | 89          | 169       |
| EMB SNP CN 4247574 AC embB D354A                     | 236    | 6       | 108         | 122       |
| EMB unknown                                          | 234    | 0       | 0           | 234       |
| EMB SNP CN 4248003 AG embB Q497R                     | 164    | 42      | 40          | 82        |
| EMB SNP CN 4247730 GC embB G406A                     | 129    | 20      | 33          | 76        |
| EMB SNP CN 409569 GA iniB A70T                       | 117    | 19      | 25          | 73        |
| EMB SNP CN 4247729 GA embB G406S                     | 71     | 9       | 14          | 48        |
| EMB SNP CN 4249583 GA embB D1024N                    | 56     | 7       | 17          | 32        |
| EMB SNP CN 4243392 AG embA N54D                      | 50     | 8       | 1           | 41        |
| EMB SNP P 4243222 CA.11 embA.embB                    | 41     | 11      | 7           | 23        |
| EMB SNP CN 4247429 AC embB M306L                     | 34     | 7       | 8           | 19        |
| EMB embB G406D u                                     | 31     | 0       | 0           | 31        |
| EMB SNP P 4243225 CT.8 embA.embB                     | 28     | 4       | 3           | 21        |
| EMB upstream intergenic-embA-embB C16G u             | 22     | 0       | 0           | 22        |
| EMB SNP CN 4249518 AG embB H1002R                    | 19     | 0       | 4           | 15        |
| EMB SNP CN 4247495 GT embB D328Y                     | 17     | 3       | 2           | 12        |
| EMB upstream intergenic-embA-embB C12T u             | 17     | 0       | 0           | 17        |
| EMB embB D328G u                                     | 12     | 0       | 0           | 12        |
| EMB embB L74R u                                      | 12     | 0       | 0           | 12        |
| EMB embB Q497K u                                     | 12     | 0       | 0           | 12        |
| EMB upstream intergenic-embA-embB C16T u             | 10     | 0       | 0           | 10        |
| EMB embB E405D u                                     | 8      | 0       | 0           | 8         |
| EMB embB N296H u                                     | 8      | 0       | 0           | 8         |
| EMB embB S297A u                                     | 7      | 0       | 0           | 7         |
| EMB upstream intergenic-embA-embB G43C u             | 7      | 0       | 0           | 7         |
| EMB SNP CN 4247729 GT embB G406C                     | 6      | 3       | 1           | 2         |
| EMB embB A409P u                                     | 5      | 0       | 0           | 5         |
| EMB upstream intergenic-embA-embB C16A u             | 5      | 0       | 0           | 5         |
| EMB embB Q445R u                                     | 4      | 0       | 0           | 4         |
| EMB embB Q497P u                                     | 4      | 0       | 0           | 4         |
| EMB embB Y319C u                                     | 4      | 0       | 0           | 4         |
| EMB embB Y319S u                                     | 4      | 0       | 0           | 4         |
| EMB embB G603R u                                     | 3      | 0       | 0           | 3         |
| EMB embB I450L u                                     | 3      | 0       | 0           | 3         |
| EMB embB T1082A u                                    | 3      | 0       | 0           | 3         |
| EMB embB T642A u                                     | 3      | 0       | 0           | 3         |
| EMB embA D808A u                                     | 2      | 0       | 0           | 2         |
| EMB embA I905V u                                     | 2      | 0       | 0           | 2         |
| EMB embA L535V u                                     | 2      | 0       | 0           | 2         |
| EMB embA S654L u                                     | 2      | 0       | 0           | 2         |
| EMB embA V534G u                                     | 2      | 0       | 0           | 2         |
| EMB embB E504D u                                     | 2      | 0       | 0           | 2         |
| EMB embB S347I u                                     | 2      | 0       | 0           | 2         |
| EMB embB V50A u                                      | 2      | 0       | 0           | 2         |
| EMB embC M351T u                                     | 2      | 0       | 0           | 2         |
| EMB iniB A182V u                                     | 2      | 0       | 0           | 2         |
| EMB upstream intergenic-embA-embB G76C u             | 2      | 0       | 0           | 2         |
| EMB embA G554D u                                     | 1      | 0       | 0           | 1         |
| EMB embA G884D u                                     | 1      | 0       | 0           | 1         |
| EMB embA T652R u                                     | 1      | 0       | 0           | 1         |
| EMB embA V31I u                                      | 1      | 0       | 0           | 1         |
| EMB embA V391L u                                     | 1      | 0       | 0           | 1         |
| EMB embA V479M u                                     | 1      | 0       | 0           | 1         |
| EMB embB C361Y u                                     | 1      | 0       | 0           | 1         |
| EMB embB D1056A u                                    | 1      | 0       | 0           | 1         |
| EMB embB D300G u                                     | 1      | 0       | 0           | 1         |
| EMB embB F323L u                                     | 1      | 0       | 0           | 1         |
| EMB embB I1009L u                                    | 1      | 0       | 0           | 1         |
| EMB embB I72L u                                      | 1      | 0       | 0           | 1         |
| EMB embB I72S u                                      | 1      | 0       | 0           | 1         |
| EMB embB L402V u                                     | 1      | 0       | 0           | 1         |
| EMB embB M306T u                                     | 1      | 0       | 0           | 1         |
| EMB embB M396I u                                     | 1      | 0       | 0           | 1         |
| EMB embB N399T u                                     | 1      | 0       | 0           | 1         |
| EMB embB N644I u                                     | 1      | 0       | 0           | 1         |
| EMB embB P404S u                                     | 1      | 0       | 0           | 1         |
| EMB embB P731L u                                     | 1      | 0       | 0           | 1         |
| EMB embB S347T u                                     | 1      | 0       | 0           | 1         |
| EMB embB S412P u                                     | 1      | 0       | 0           | 1         |
| EMB embB S538P u                                     | 1      | 0       | 0           | 1         |
| EMB embB T546I u                                     | 1      | 0       | 0           | 1         |
| EMB embB T581A u                                     | 1      | 0       | 0           | 1         |
| EMB embB T643I u                                     | 1      | 0       | 0           | 1         |
| EMB embB W332R u                                     | 1      | 0       | 0           | 1         |
| EMB embB Y319D u                                     | 1      | 0       | 0           | 1         |
| EMB embC A68T u                                      | 1      | 0       | 0           | 1         |
| EMB embC C411Y u                                     | 1      | 0       | 0           | 1         |
| EMB embC H10T u                                      | 1      | 0       | 0           | 1         |
| EMB iniB G386D u                                     | 1      | 0       | 0           | 1         |
| EMB upstream intergenic-embA-embB C15G u             | 1      | 0       | 0           | 1         |
| EMB upstream intergenic-embA-embB d42CAT u           | 1      | 0       | 0           | 1         |
| EMB upstream intergenic-embA-embB d43G u             | 1      | 0       | 0           | 1         |
| EMB upstream intergenic-embA-embB i.14-5TACCATCGAG u | 1      | 0       | 0           | 1         |

Ethionamide (ETH) Data, Abbreviations: counts = how many isolates had this mutation, no\_data = how many isolates had this mutation but no data on whether they were phenotypically resistant or not to ETH, susceptible = how many isolates had this mutation but were phenotypically susceptible to ETH, resistant = how many isolates had this mutation but were resistant to ETH

| country                          | ETH_SNP_CN_1674263_TC_inhA_I21T | ETH_SNP_CN_1674481_TG_inhA_S94A | ETH_SNP_CN_4326333_CG_ethA_A381P | ETH_SNP_P_1673423_GT.17_fabG1.inhA | ETH_SNP_P_1673425_CT.15_fabG1.inhA | ETH_othersnp | ETH_unknown |
|----------------------------------|---------------------------------|---------------------------------|----------------------------------|------------------------------------|------------------------------------|--------------|-------------|
| Azerbaijan                       | 0                               | 0                               | 0                                | 0                                  | 0                                  | 0            | 0           |
| Bangladesh                       | 0                               | 0                               | 0                                | 0                                  | 0                                  | 0            | 0           |
| Belarus                          | 0                               | 0                               | 0                                | 0                                  | 30                                 | 0            | 0           |
| Brazil                           | 0                               | 0                               | 0                                | 0                                  | 0                                  | 0            | 0           |
| Burma                            | 0                               | 0                               | 0                                | 0                                  | 0                                  | 0            | 0           |
| Canada                           | 0                               | 0                               | 0                                | 0                                  | 0                                  | 0            | 0           |
| China                            | 0                               | 1                               | 0                                | 0                                  | 18                                 | 13           | 15          |
| Colombia                         | 0                               | 0                               | 0                                | 1                                  | 0                                  | 0            | 0           |
| Democratic Republic of the Congo | 0                               | 0                               | 0                                | 0                                  | 0                                  | 0            | 0           |
| Denmark                          | 0                               | 0                               | 0                                | 0                                  | 0                                  | 0            | 0           |
| Djibouti                         | 0                               | 0                               | 0                                | 0                                  | 0                                  | 0            | 0           |
| Dominican Republic               | 0                               | 0                               | 0                                | 0                                  | 0                                  | 0            | 0           |
| Estonia                          | 0                               | 0                               | 0                                | 0                                  | 0                                  | 0            | 0           |
| Georgia                          | 0                               | 0                               | 0                                | 0                                  | 1                                  | 0            | 0           |
| Germany                          | 0                               | 3                               | 0                                | 0                                  | 21                                 | 0            | 0           |
| Guinea                           | 0                               | 0                               | 0                                | 0                                  | 2                                  | 0            | 0           |
| India                            | 0                               | 0                               | 0                                | 0                                  | 1                                  | 0            | 0           |
| Indonesia                        | 0                               | 0                               | 0                                | 0                                  | 0                                  | 0            | 0           |
| Iran                             | 0                               | 0                               | 0                                | 0                                  | 0                                  | 0            | 0           |
| Kazakhstan                       | 0                               | 0                               | 0                                | 0                                  | 0                                  | 0            | 0           |
| Malawi                           | 1                               | 11                              | 0                                | 0                                  | 15                                 | 0            | 0           |
| Mali                             | 0                               | 1                               | 0                                | 0                                  | 2                                  | 0            | 0           |
| Moldova                          | 0                               | 0                               | 0                                | 0                                  | 25                                 | 0            | 0           |
| Morocco                          | 0                               | 0                               | 0                                | 0                                  | 0                                  | 0            | 0           |
| Nepal                            | 0                               | 0                               | 0                                | 0                                  | 0                                  | 0            | 0           |
| Netherlands                      | 0                               | 0                               | 0                                | 0                                  | 0                                  | 0            | 0           |
| Nigeria                          | 0                               | 0                               | 0                                | 0                                  | 0                                  | 0            | 0           |
| Not Provided                     | 12                              | 98                              | 12                               | 14                                 | 573                                | 51           | 46          |
| Pakistan                         | 0                               | 0                               | 0                                | 0                                  | 1                                  | 0            | 0           |
| Peru                             | 33                              | 20                              | 1                                | 27                                 | 178                                | 100          | 76          |
| Philippines                      | 0                               | 0                               | 0                                | 0                                  | 0                                  | 0            | 0           |
| Portugal                         | 0                               | 0                               | 0                                | 0                                  | 0                                  | 0            | 0           |
| Romania                          | 0                               | 0                               | 0                                | 0                                  | 7                                  | 0            | 0           |
| Russia                           | 0                               | 4                               | 0                                | 2                                  | 50                                 | 0            | 3           |
| Rwanda                           | 0                               | 0                               | 0                                | 0                                  | 1                                  | 0            | 0           |
| Sierra Leone                     | 0                               | 1                               | 0                                | 1                                  | 1                                  | 0            | 0           |
| South Africa                     | 8                               | 2                               | 76                               | 37                                 | 113                                | 11           | 6           |
| South Korea                      | 0                               | 2                               | 0                                | 0                                  | 8                                  | 6            | 10          |
| Spain                            | 0                               | 1                               | 0                                | 0                                  | 1                                  | 0            | 0           |
| Swaziland                        | 0                               | 0                               | 0                                | 0                                  | 0                                  | 0            | 0           |
| Thailand                         | 0                               | 0                               | 0                                | 0                                  | 0                                  | 0            | 0           |
| Turkmenistan                     | 0                               | 0                               | 0                                | 0                                  | 0                                  | 0            | 0           |
| Uganda                           | 0                               | 0                               | 0                                | 0                                  | 4                                  | 0            | 1           |
| United Kingdom                   | 2                               | 4                               | 1                                | 6                                  | 76                                 | 1            | 0           |
| Uzbekistan                       | 1                               | 0                               | 0                                | 1                                  | 9                                  | 0            | 1           |
| Vietnam                          | 0                               | 0                               | 0                                | 0                                  | 1                                  | 0            | 0           |

| resistance mutation                       | counts | no_data | susceptible | resistant |
|-------------------------------------------|--------|---------|-------------|-----------|
| ETH SNP P 1673425 CT.15 fabG1.inhA        | 1138   | 716     | 157         | 265       |
| ETH unknown                               | 158    | 0       | 0           | 158       |
| ETH SNP CN 1674481 TG inhA S94A           | 148    | 52      | 13          | 83        |
| ETH SNP CN 4326333 CG ethA A381P          | 90     | 21      | 35          | 34        |
| ETH SNP P 1673423 GT.17 fabG1.inhA        | 89     | 32      | 38          | 19        |
| ETH SNP CN 1674263 TC inhA I21T           | 57     | 18      | 10          | 29        |
| ETH SNP CN 4326116 GA ethA T453I          | 35     | 6       | 14          | 15        |
| ETH SNP CN 4327380 AC ethA Y32D           | 15     | 2       | 9           | 4         |
| ETH upstream intergenic-fabG1-inhA T8A u  | 14     | 0       | 0           | 14        |
| ETH DEL F 4326184 d1289G ethA             | 12     | 5       | 4           | 3         |
| ETH SNP CN 4327416 CA ethA A20S           | 12     | 5       | 4           | 3         |
| ETH ethA P378L u                          | 9      | 0       | 0           | 9         |
| ETH INS F 4326722 i751C ethA              | 6      | 2       | 1           | 3         |
| ETH SNP CN 4326305 GA ethA S390F          | 6      | 2       | 1           | 3         |
| ETH SNP CN 4326713 TG ethA Q254P          | 6      | 1       | 0           | 5         |
| ETH upstream intergenic-fabG1-inhA T8C u  | 6      | 0       | 0           | 6         |
| ETH upstream intergenic-fabG1-inhA T8G u  | 4      | 0       | 0           | 4         |
| ETH ethA S266R u                          | 3      | 0       | 0           | 3         |
| ETH ethA C403R u                          | 2      | 0       | 0           | 2         |
| ETH ethA E400D u                          | 2      | 0       | 0           | 2         |
| ETH ethA F302L u                          | 2      | 0       | 0           | 2         |
| ETH ethA S110W u                          | 2      | 0       | 0           | 2         |
| ETH ethA Y50C u                           | 2      | 0       | 0           | 2         |
| ETH SNP CN 4327311 AG ethA S55P           | 1      | 0       | 1           | 0         |
| ETH ethA A76V u                           | 1      | 0       | 0           | 1         |
| ETH ethA F320S u                          | 1      | 0       | 0           | 1         |
| ETH ethA F431V u                          | 1      | 0       | 0           | 1         |
| ETH ethA G139C u                          | 1      | 0       | 0           | 1         |
| ETH ethA G139S u                          | 1      | 0       | 0           | 1         |
| ETH ethA G139V u                          | 1      | 0       | 0           | 1         |
| ETH ethA G182S u                          | 1      | 0       | 0           | 1         |
| ETH ethA G423R u                          | 1      | 0       | 0           | 1         |
| ETH ethA G43C u                           | 1      | 0       | 0           | 1         |
| ETH ethA G450D u                          | 1      | 0       | 0           | 1         |
| ETH ethA H166P u                          | 1      | 0       | 0           | 1         |
| ETH ethA L134P u                          | 1      | 0       | 0           | 1         |
| ETH ethA L194P u                          | 1      | 0       | 0           | 1         |
| ETH ethA L205P u                          | 1      | 0       | 0           | 1         |
| ETH ethA L374R u                          | 1      | 0       | 0           | 1         |
| ETH ethA L397R u                          | 1      | 0       | 0           | 1         |
| ETH ethA N379D u                          | 1      | 0       | 0           | 1         |
| ETH ethA P149S u                          | 1      | 0       | 0           | 1         |
| ETH ethA P257A u                          | 1      | 0       | 0           | 1         |
| ETH ethA P257S u                          | 1      | 0       | 0           | 1         |
| ETH ethA P51H u                           | 1      | 0       | 0           | 1         |
| ETH ethA P51L u                           | 1      | 0       | 0           | 1         |
| ETH ethA P51S u                           | 1      | 0       | 0           | 1         |
| ETH ethA Q206E u                          | 1      | 0       | 0           | 1         |
| ETH ethA Q246R u                          | 1      | 0       | 0           | 1         |
| ETH ethA R38P u                           | 1      | 0       | 0           | 1         |
| ETH ethA R404L u                          | 1      | 0       | 0           | 1         |
| ETH ethA R54S u                           | 1      | 0       | 0           | 1         |
| ETH ethA S18R u                           | 1      | 0       | 0           | 1         |
| ETH ethA S208P u                          | 1      | 0       | 0           | 1         |
| ETH ethA S57F u                           | 1      | 0       | 0           | 1         |
| ETH ethA T189K u                          | 1      | 0       | 0           | 1         |
| ETH ethA T342K u                          | 1      | 0       | 0           | 1         |
| ETH ethA T383P u                          | 1      | 0       | 0           | 1         |
| ETH ethA T392R u                          | 1      | 0       | 0           | 1         |
| ETH ethA T44P u                           | 1      | 0       | 0           | 1         |
| ETH ethA T61M u                           | 1      | 0       | 0           | 1         |
| ETH ethA Y235D u                          | 1      | 0       | 0           | 1         |
| ETH fabG1 L85V u                          | 1      | 0       | 0           | 1         |
| ETH inhA I194T u                          | 1      | 0       | 0           | 1         |
| ETH inhA I21V u                           | 1      | 0       | 0           | 1         |
| ETH inhA I95L u                           | 1      | 0       | 0           | 1         |
| ETH upstream intergenic-fabG1-inhA C34T u | 1      | 0       | 0           | 1         |
| ETH INS F 4326141 i1332C ethA             | 0      | 0       | 0           | 0         |
| ETH SNP CN 1673449 AC fabG1 T4P           | 0      | 0       | 0           | 0         |
| ETH SNP CN 1674434 TG inhA V78G           | 0      | 0       | 0           | 0         |
| ETH SNP CN 4326278 GT ethA S399.          | 0      | 0       | 0           | 0         |
| ETH SNP CN 4326600 GA ethA R292.          | 0      | 0       | 0           | 0         |
| ETH SNP CN 4326714 GA ethA Q254.          | 0      | 0       | 0           | 0         |
| ETH SNP CN 4327148 CT ethA W109.          | 0      | 0       | 0           | 0         |

Isoniazid (INH) Data, Abbreviations: counts = how many isolates had this mutation, no\_data = how many isolates had this mutation but no data on whether they were phenotypically resistant or not to INH, susceptible = how many isolates had this mutation but were phenotypically susceptible to INH, resistant = how many isolates had this mutation but were resistant to INH

| country                          | INH SNP CN 1674481 TG inhA S94A | INH SNP CN 2155168 CG katG S315T | INH SNP CN 2518919 GA kasA G269S | INH SNP CN 409569 GA iniB A70T | INH SNP P 1673425 CT.15 fabG1.inhA | INH othersnp | INH unknown |
|----------------------------------|---------------------------------|----------------------------------|----------------------------------|--------------------------------|------------------------------------|--------------|-------------|
| Azerbaijan                       | 0                               | 1                                | 0                                | 0                              | 0                                  | 0            | 0           |
| Bangladesh                       | 0                               | 1                                | 0                                | 0                              | 0                                  | 0            | 2           |
| Belarus                          | 0                               | 101                              | 23                               | 0                              | 30                                 | 43           | 1           |
| Brazil                           | 0                               | 0                                | 0                                | 0                              | 0                                  | 3            | 0           |
| Burma                            | 0                               | 1                                | 0                                | 0                              | 0                                  | 0            | 0           |
| Canada                           | 0                               | 0                                | 0                                | 0                              | 0                                  | 0            | 0           |
| China                            | 1                               | 65                               | 0                                | 0                              | 18                                 | 24           | 4           |
| Colombia                         | 0                               | 0                                | 0                                | 0                              | 0                                  | 1            | 0           |
| Democratic Republic of the Congo | 0                               | 0                                | 0                                | 0                              | 0                                  | 0            | 0           |
| Denmark                          | 0                               | 0                                | 0                                | 0                              | 0                                  | 0            | 0           |
| Djibouti                         | 0                               | 0                                | 0                                | 0                              | 0                                  | 0            | 0           |
| Dominican Republic               | 0                               | 0                                | 0                                | 0                              | 0                                  | 0            | 0           |
| Estonia                          | 0                               | 2                                | 0                                | 0                              | 0                                  | 0            | 0           |
| Georgia                          | 0                               | 5                                | 0                                | 0                              | 1                                  | 0            | 0           |
| Germany                          | 3                               | 43                               | 24                               | 2                              | 21                                 | 4            | 4           |
| Guinea                           | 0                               | 0                                | 0                                | 0                              | 2                                  | 0            | 0           |
| India                            | 0                               | 8                                | 0                                | 0                              | 1                                  | 1            | 0           |
| Indonesia                        | 0                               | 0                                | 0                                | 0                              | 0                                  | 0            | 0           |
| Iran                             | 0                               | 11                               | 0                                | 0                              | 0                                  | 0            | 1           |
| Kazakhstan                       | 0                               | 2                                | 0                                | 0                              | 0                                  | 0            | 0           |
| Malawi                           | 11                              | 50                               | 24                               | 0                              | 15                                 | 4            | 12          |
| Mali                             | 1                               | 23                               | 0                                | 0                              | 2                                  | 5            | 0           |
| Moldova                          | 0                               | 43                               | 3                                | 0                              | 25                                 | 0            | 0           |
| Morocco                          | 0                               | 1                                | 0                                | 0                              | 0                                  | 0            | 0           |
| Nepal                            | 0                               | 4                                | 0                                | 0                              | 0                                  | 0            | 0           |
| Netherlands                      | 0                               | 3                                | 0                                | 0                              | 0                                  | 0            | 1           |
| Nigeria                          | 0                               | 1                                | 0                                | 0                              | 0                                  | 0            | 0           |
| Not Provided                     | 98                              | 539                              | 120                              | 27                             | 573                                | 102          | 82          |
| Pakistan                         | 0                               | 0                                | 0                                | 0                              | 1                                  | 0            | 0           |
| Peru                             | 20                              | 593                              | 299                              | 88                             | 178                                | 80           | 40          |
| Philippines                      | 0                               | 0                                | 0                                | 0                              | 0                                  | 0            | 2           |
| Portugal                         | 0                               | 1                                | 0                                | 0                              | 0                                  | 0            | 0           |
| Romania                          | 0                               | 30                               | 1                                | 0                              | 7                                  | 5            | 0           |
| Russia                           | 4                               | 470                              | 61                               | 0                              | 50                                 | 20           | 49          |
| Rwanda                           | 0                               | 1                                | 0                                | 0                              | 1                                  | 1            | 2           |
| Sierra Leone                     | 1                               | 16                               | 8                                | 0                              | 1                                  | 3            | 2           |
| South Africa                     | 2                               | 299                              | 98                               | 0                              | 113                                | 57           | 13          |
| South Korea                      | 2                               | 35                               | 0                                | 0                              | 8                                  | 3            | 6           |
| Spain                            | 1                               | 0                                | 0                                | 0                              | 1                                  | 0            | 0           |
| Swaziland                        | 0                               | 0                                | 0                                | 0                              | 0                                  | 1            | 0           |
| Thailand                         | 0                               | 0                                | 0                                | 0                              | 0                                  | 0            | 0           |
| Turkmenistan                     | 0                               | 6                                | 0                                | 0                              | 0                                  | 0            | 0           |
| Uganda                           | 0                               | 35                               | 1                                | 0                              | 4                                  | 3            | 2           |
| United Kingdom                   | 4                               | 173                              | 34                               | 0                              | 76                                 | 26           | 13          |
| Uzbekistan                       | 0                               | 226                              | 11                               | 0                              | 9                                  | 24           | 5           |
| Vietnam                          | 0                               | 0                                | 0                                | 0                              | 1                                  | 0            | 0           |

| resistance mutation                        | counts | no data | susceptible | resistant |
|--------------------------------------------|--------|---------|-------------|-----------|
| INH SNP CN 2155168 CG katG S315T           | 2790   | 210     | 310         | 2270      |
| INH SNP P 1673425 CT.15 fabG1.inhA         | 1138   | 424     | 100         | 614       |
| INH SNP CN 2518919 GA kasA G269S           | 707    | 58      | 248         | 401       |
| INH unknown                                | 241    | 0       | 0           | 241       |
| INH SNP CN 1674481 TG inhA S94A            | 148    | 25      | 10          | 113       |
| INH SNP CN 409569 GA iniB A70T             | 117    | 19      | 9           | 89        |
| INH SNP P 1673432 TC.8 fabG1.inhA          | 102    | 33      | 36          | 33        |
| INH SNP P 1673423 GT.17 fabG1.inhA         | 89     | 8       | 12          | 69        |
| INH SNP CN 2155168 CT katG S315N           | 58     | 5       | 5           | 48        |
| INH SNP CN 2155167 GT katG S315R           | 56     | 3       | 5           | 48        |
| INH SNP P 1673432 TG.8 fabG1.inhA          | 10     | 0       | 1           | 9         |
| INH inhA I21T u                            | 3      | 0       | 0           | 3         |
| INH katG G279D u                           | 3      | 0       | 0           | 3         |
| INH katG R104Q u                           | 3      | 0       | 0           | 3         |
| INH katG S315G u                           | 3      | 0       | 0           | 3         |
| INH katG W161R u                           | 3      | 0       | 0           | 3         |
| INH katG D735Y u                           | 2      | 0       | 0           | 2         |
| INH katG L141F u                           | 2      | 0       | 0           | 2         |
| INH katG L141S u                           | 2      | 0       | 0           | 2         |
| INH katG N138H u                           | 2      | 0       | 0           | 2         |
| INH katG W191R u                           | 2      | 0       | 0           | 2         |
| INH katG Y337C u                           | 2      | 0       | 0           | 2         |
| INH katG Y413C u                           | 2      | 0       | 0           | 2         |
| INH ahpC P44R u                            | 1      | 0       | 0           | 1         |
| INH inhA K118E u                           | 1      | 0       | 0           | 1         |
| INH iniB A222T u                           | 1      | 0       | 0           | 1         |
| INH iniB G131R u                           | 1      | 0       | 0           | 1         |
| INH iniB G171D u                           | 1      | 0       | 0           | 1         |
| INH iniB G386D u                           | 1      | 0       | 0           | 1         |
| INH iniB S249R u                           | 1      | 0       | 0           | 1         |
| INH kasA A45S u                            | 1      | 0       | 0           | 1         |
| INH kasA R161S u                           | 1      | 0       | 0           | 1         |
| INH katG A109V u                           | 1      | 0       | 0           | 1         |
| INH katG A139P u                           | 1      | 0       | 0           | 1         |
| INH katG A162E u                           | 1      | 0       | 0           | 1         |
| INH katG A614E u                           | 1      | 0       | 0           | 1         |
| INH katG D142G u                           | 1      | 0       | 0           | 1         |
| INH katG D163N u                           | 1      | 0       | 0           | 1         |
| INH katG D189A u                           | 1      | 0       | 0           | 1         |
| INH katG D259Y u                           | 1      | 0       | 0           | 1         |
| INH katG D282G u                           | 1      | 0       | 0           | 1         |
| INH katG D419H u                           | 1      | 0       | 0           | 1         |
| INH katG D487N u                           | 1      | 0       | 0           | 1         |
| INH katG D656A u                           | 1      | 0       | 0           | 1         |
| INH katG D695A u                           | 1      | 0       | 0           | 1         |
| INH katG D94G u                            | 1      | 0       | 0           | 1         |
| INH katG F408L u                           | 1      | 0       | 0           | 1         |
| INH katG G120S u                           | 1      | 0       | 0           | 1         |
| INH katG G182R u                           | 1      | 0       | 0           | 1         |
| INH katG G273S u                           | 1      | 0       | 0           | 1         |
| INH katG G285S u                           | 1      | 0       | 0           | 1         |
| INH katG G297V u                           | 1      | 0       | 0           | 1         |
| INH katG G299S u                           | 1      | 0       | 0           | 1         |
| INH katG G630R u                           | 1      | 0       | 0           | 1         |
| INH katG G699V u                           | 1      | 0       | 0           | 1         |
| INH katG G99R u                            | 1      | 0       | 0           | 1         |
| INH katG K537E u                           | 1      | 0       | 0           | 1         |
| INH katG L159F u                           | 1      | 0       | 0           | 1         |
| INH katG L159P u                           | 1      | 0       | 0           | 1         |
| INH katG L598F u                           | 1      | 0       | 0           | 1         |
| INH katG L76P u                            | 1      | 0       | 0           | 1         |
| INH katG N138D u                           | 1      | 0       | 0           | 1         |
| INH katG P232R u                           | 1      | 0       | 0           | 1         |
| INH katG P325S u                           | 1      | 0       | 0           | 1         |
| INH katG Q461P u                           | 1      | 0       | 0           | 1         |
| INH katG R571H u                           | 1      | 0       | 0           | 1         |
| INH katG S302R u                           | 1      | 0       | 0           | 1         |
| INH katG S315I u                           | 1      | 0       | 0           | 1         |
| INH katG T180K u                           | 1      | 0       | 0           | 1         |
| INH katG T271I u                           | 1      | 0       | 0           | 1         |
| INH katG T475I u                           | 1      | 0       | 0           | 1         |
| INH katG V320L u                           | 1      | 0       | 0           | 1         |
| INH katG V423I u                           | 1      | 0       | 0           | 1         |
| INH katG V442A u                           | 1      | 0       | 0           | 1         |
| INH katG V626E u                           | 1      | 0       | 0           | 1         |
| INH katG V633A u                           | 1      | 0       | 0           | 1         |
| INH katG W191G u                           | 1      | 0       | 0           | 1         |
| INH katG W300C u                           | 1      | 0       | 0           | 1         |
| INH katG W300R u                           | 1      | 0       | 0           | 1         |
| INH katG W300S u                           | 1      | 0       | 0           | 1         |
| INH katG W328L u                           | 1      | 0       | 0           | 1         |
| INH katG W341G u                           | 1      | 0       | 0           | 1         |
| INH katG W438G u                           | 1      | 0       | 0           | 1         |
| INH katG W90R u                            | 1      | 0       | 0           | 1         |
| INH katG Y413H u                           | 1      | 0       | 0           | 1         |
| INH katG Y608F u                           | 1      | 0       | 0           | 1         |
| INH katG Y98C u                            | 1      | 0       | 0           | 1         |
| INH upstream intergenic-fabG1-inhA G102A u | 1      | 0       | 0           | 1         |
| INH upstream intergenic-fabG1-inhA T8A u   | 1      | 0       | 0           | 1         |
| INH SNP CN 2726338 TG ahpC V49G            | 0      | 0       | 0           | 0         |

Kanamycin (KAN) Data, Abbreviations: counts = how many isolates had this mutation, no\_data = how many isolates had this mutation but no data on whether they were phenotypically resistant or not to KAN, susceptible = how many isolates had this mutation but were phenotypically susceptible to KAN, resistant = how many isolates had this mutation but were resistant to KAN

| country                          | KAN_SNP_N_1473246_A1401G_rrs | KAN_othersnp | KAN_rrs_A514C_u | KAN_rrs_A906G_u | KAN_rrs_C513T_u | KAN_rrs_G1484T_u | KAN_unknown |
|----------------------------------|------------------------------|--------------|-----------------|-----------------|-----------------|------------------|-------------|
| Azerbaijan                       | 0                            | 0            | 0               | 0               | 0               | 0                | 0           |
| Bangladesh                       | 0                            | 0            | 0               | 0               | 0               | 0                | 0           |
| Belarus                          | 51                           | 0            | 0               | 0               | 0               | 0                | 0           |
| Brazil                           | 0                            | 0            | 0               | 0               | 0               | 0                | 0           |
| Burma                            | 0                            | 0            | 0               | 0               | 0               | 0                | 0           |
| Canada                           | 0                            | 0            | 0               | 0               | 0               | 0                | 0           |
| China                            | 14                           | 1            | 2               | 0               | 0               | 0                | 6           |
| Colombia                         | 1                            | 0            | 0               | 0               | 0               | 0                | 0           |
| Democratic Republic of the Congo | 0                            | 0            | 0               | 0               | 0               | 0                | 0           |
| Denmark                          | 0                            | 0            | 0               | 0               | 0               | 0                | 0           |
| Djibouti                         | 0                            | 0            | 0               | 0               | 0               | 0                | 0           |
| Dominican Republic               | 0                            | 0            | 0               | 0               | 0               | 0                | 0           |
| Estonia                          | 0                            | 0            | 0               | 0               | 0               | 0                | 0           |
| Georgia                          | 3                            | 0            | 0               | 0               | 0               | 0                | 0           |
| Germany                          | 3                            | 0            | 0               | 0               | 0               | 0                | 0           |
| Guinea                           | 0                            | 0            | 0               | 0               | 0               | 0                | 0           |
| India                            | 0                            | 0            | 0               | 0               | 0               | 0                | 0           |
| Indonesia                        | 0                            | 0            | 0               | 0               | 0               | 0                | 0           |
| Iran                             | 3                            | 0            | 0               | 0               | 0               | 0                | 0           |
| Kazakhstan                       | 0                            | 0            | 0               | 0               | 0               | 0                | 0           |
| Malawi                           | 0                            | 0            | 0               | 0               | 0               | 0                | 0           |
| Mali                             | 0                            | 0            | 0               | 0               | 0               | 0                | 0           |
| Moldova                          | 0                            | 0            | 0               | 0               | 0               | 0                | 0           |
| Morocco                          | 0                            | 0            | 0               | 0               | 0               | 0                | 0           |
| Nepal                            | 0                            | 0            | 0               | 0               | 0               | 0                | 0           |
| Netherlands                      | 0                            | 0            | 0               | 0               | 0               | 0                | 0           |
| Nigeria                          | 0                            | 0            | 0               | 0               | 0               | 0                | 0           |
| Not Provided                     | 160                          | 6            | 3               | 0               | 3               | 7                | 53          |
| Pakistan                         | 0                            | 0            | 0               | 0               | 0               | 0                | 0           |
| Peru                             | 110                          | 4            | 1               | 5               | 4               | 0                | 59          |
| Philippines                      | 0                            | 0            | 0               | 0               | 0               | 0                | 0           |
| Portugal                         | 0                            | 0            | 0               | 0               | 0               | 0                | 0           |
| Romania                          | 12                           | 0            | 0               | 0               | 0               | 0                | 2           |
| Russia                           | 35                           | 0            | 0               | 0               | 0               | 0                | 0           |
| Rwanda                           | 2                            | 0            | 0               | 0               | 0               | 0                | 0           |
| Sierra Leone                     | 0                            | 0            | 0               | 0               | 0               | 0                | 0           |
| South Africa                     | 164                          | 2            | 2               | 0               | 0               | 0                | 17          |
| South Korea                      | 26                           | 0            | 0               | 1               | 0               | 0                | 24          |
| Spain                            | 0                            | 0            | 0               | 0               | 0               | 0                | 0           |
| Swaziland                        | 0                            | 0            | 0               | 0               | 0               | 0                | 0           |
| Thailand                         | 0                            | 0            | 0               | 0               | 0               | 0                | 0           |
| Turkmenistan                     | 0                            | 0            | 0               | 0               | 0               | 0                | 0           |
| Uganda                           | 1                            | 0            | 0               | 0               | 0               | 0                | 0           |
| United Kingdom                   | 8                            | 0            | 0               | 0               | 0               | 0                | 4           |
| Uzbekistan                       | 46                           | 0            | 0               | 0               | 0               | 0                | 0           |
| Vietnam                          | 0                            | 0            | 0               | 0               | 0               | 0                | 0           |



| <b>resistance mutation</b>       | <b>counts</b> | <b>no data</b> | <b>susceptible</b> | <b>resistant</b> |
|----------------------------------|---------------|----------------|--------------------|------------------|
| KAN SNP N 1473246 A1401G rrs     | 639           | 208            | 83                 | 348              |
| KAN unknown                      | 165           | 0              | 0                  | 165              |
| KAN rrs A514C u                  | 8             | 0              | 0                  | 8                |
| KAN rrs C513T u                  | 7             | 0              | 0                  | 7                |
| KAN rrs G1484T u                 | 7             | 0              | 0                  | 7                |
| KAN rrs A906G u                  | 6             | 0              | 0                  | 6                |
| KAN rrs C517T u                  | 4             | 0              | 0                  | 4                |
| KAN rrs C905A u                  | 2             | 0              | 0                  | 2                |
| KAN rrs A365G u                  | 1             | 0              | 0                  | 1                |
| KAN rrs A514T u                  | 1             | 0              | 0                  | 1                |
| KAN rrs A908C u                  | 1             | 0              | 0                  | 1                |
| KAN rrs A908G u                  | 1             | 0              | 0                  | 1                |
| KAN rrs C1105G u                 | 1             | 0              | 0                  | 1                |
| KAN rrs C1402A u                 | 1             | 0              | 0                  | 1                |
| KAN rrs G878A u                  | 1             | 0              | 0                  | 1                |
| KAN SNP CN 1918745 AG tlyA .269W | 0             | 0              | 0                  | 0                |

Levofloxacin (LEVO) Data, Abbreviations: counts = how many isolates had this mutation, no\_data = how many isolates had this mutation but no data on whether they were phenotypically resistant or not to LEVO, susceptible = how many isolates had this mutation but were phenotypically susceptible to LEVO, resistant = how many isolates had this mutation but were resistant to LEVO

| country                          | LEVO_SNP_CN_7570_CT_gyrA_A90V | LEVO_SNP_CN_7572_TC_gyrA_S91P | LEVO_SNP_CN_7581_GA_gyrA_D94N | LEVO_SNP_CN_7582_AC_gyrA_D94A | LEVO_SNP_CN_7582_AG_gyrA_D94G | LEVO_othersnp | LEVO_unknown |
|----------------------------------|-------------------------------|-------------------------------|-------------------------------|-------------------------------|-------------------------------|---------------|--------------|
| Azerbaijan                       | 0                             | 0                             | 0                             | 0                             | 0                             | 0             | 0            |
| Bangladesh                       | 0                             | 0                             | 0                             | 0                             | 0                             | 0             | 0            |
| Belarus                          | 23                            | 6                             | 2                             | 11                            | 21                            | 5             | 0            |
| Brazil                           | 0                             | 0                             | 0                             | 0                             | 0                             | 0             | 0            |
| Burma                            | 0                             | 0                             | 0                             | 1                             | 0                             | 0             | 0            |
| Canada                           | 0                             | 0                             | 0                             | 0                             | 0                             | 0             | 0            |
| China                            | 11                            | 4                             | 1                             | 7                             | 18                            | 4             | 0            |
| Colombia                         | 0                             | 0                             | 0                             | 0                             | 0                             | 0             | 0            |
| Democratic Republic of the Congo | 0                             | 0                             | 0                             | 0                             | 0                             | 0             | 0            |
| Denmark                          | 0                             | 0                             | 0                             | 0                             | 0                             | 0             | 0            |
| Djibouti                         | 0                             | 0                             | 0                             | 0                             | 0                             | 0             | 0            |
| Dominican Republic               | 0                             | 0                             | 0                             | 0                             | 0                             | 0             | 0            |
| Estonia                          | 0                             | 0                             | 0                             | 0                             | 1                             | 0             | 0            |
| Georgia                          | 0                             | 0                             | 0                             | 0                             | 0                             | 0             | 0            |
| Germany                          | 0                             | 2                             | 1                             | 1                             | 2                             | 0             | 0            |
| Guinea                           | 0                             | 0                             | 0                             | 0                             | 0                             | 0             | 0            |
| India                            | 2                             | 0                             | 0                             | 0                             | 2                             | 1             | 0            |
| Indonesia                        | 0                             | 0                             | 0                             | 0                             | 0                             | 0             | 0            |
| Iran                             | 3                             | 0                             | 0                             | 1                             | 6                             | 0             | 0            |
| Kazakhstan                       | 0                             | 0                             | 0                             | 0                             | 0                             | 0             | 0            |
| Malawi                           | 0                             | 0                             | 0                             | 0                             | 0                             | 0             | 0            |
| Mali                             | 1                             | 0                             | 0                             | 0                             | 0                             | 0             | 0            |
| Moldova                          | 0                             | 0                             | 0                             | 0                             | 0                             | 1             | 0            |
| Morocco                          | 0                             | 0                             | 0                             | 0                             | 0                             | 0             | 0            |
| Nepal                            | 0                             | 0                             | 0                             | 0                             | 0                             | 0             | 0            |
| Netherlands                      | 0                             | 0                             | 0                             | 0                             | 1                             | 0             | 0            |
| Nigeria                          | 0                             | 0                             | 0                             | 0                             | 0                             | 0             | 0            |
| Not Provided                     | 57                            | 36                            | 12                            | 25                            | 86                            | 19            | 10           |
| Pakistan                         | 1                             | 0                             | 0                             | 0                             | 0                             | 0             | 0            |
| Peru                             | 20                            | 1                             | 8                             | 9                             | 29                            | 10            | 3            |
| Philippines                      | 0                             | 0                             | 0                             | 0                             | 0                             | 0             | 0            |
| Portugal                         | 0                             | 0                             | 0                             | 0                             | 0                             | 0             | 0            |
| Romania                          | 2                             | 0                             | 0                             | 3                             | 1                             | 1             | 0            |
| Russia                           | 10                            | 5                             | 7                             | 12                            | 31                            | 4             | 0            |
| Rwanda                           | 1                             | 0                             | 0                             | 0                             | 0                             | 0             | 0            |
| Sierra Leone                     | 0                             | 0                             | 0                             | 0                             | 0                             | 0             | 0            |
| South Africa                     | 78                            | 4                             | 6                             | 21                            | 44                            | 12            | 0            |
| South Korea                      | 13                            | 3                             | 2                             | 2                             | 14                            | 1             | 0            |
| Spain                            | 0                             | 0                             | 0                             | 0                             | 0                             | 0             | 0            |
| Swaziland                        | 0                             | 0                             | 0                             | 0                             | 0                             | 0             | 0            |
| Thailand                         | 0                             | 0                             | 0                             | 0                             | 0                             | 0             | 0            |
| Turkmenistan                     | 0                             | 0                             | 0                             | 0                             | 0                             | 0             | 0            |
| Uganda                           | 0                             | 1                             | 0                             | 0                             | 0                             | 0             | 0            |
| United Kingdom                   | 7                             | 7                             | 2                             | 1                             | 30                            | 1             | 0            |
| Uzbekistan                       | 0                             | 0                             | 0                             | 0                             | 0                             | 0             | 0            |
| Vietnam                          | 0                             | 0                             | 0                             | 0                             | 0                             | 0             | 0            |

| <b>resistance mutation</b>     | <b>counts</b> | <b>no_data</b> | <b>susceptible</b> | <b>resistant</b> |
|--------------------------------|---------------|----------------|--------------------|------------------|
| LEVO SNP CN 7582 AG gyrA D94G  | 286           | 270            | 0                  | 16               |
| LEVO SNP CN 7570 CT gyrA A90V  | 229           | 214            | 2                  | 13               |
| LEVO SNP CN 7582 AC gyrA D94A  | 94            | 91             | 0                  | 3                |
| LEVO SNP CN 7572 TC gyrA S91P  | 69            | 66             | 0                  | 3                |
| LEVO SNP CN 7581 GA gyrA D94N  | 41            | 39             | 0                  | 2                |
| LEVO SNP CN 7581 GT gyrA D94Y  | 34            | 33             | 0                  | 1                |
| LEVO unknown                   | 13            | 0              | 0                  | 13               |
| LEVO SNP CN 6735 AC gyrB N538T | 10            | 8              | 1                  | 1                |
| LEVO SNP CN 7563 GT gyrA G88C  | 8             | 7              | 0                  | 1                |
| LEVO SNP CN 7566 GA gyrA D89N  | 6             | 5              | 1                  | 0                |
| LEVO gyrA R128K u              | 1             | 0              | 0                  | 1                |

Ofloxacin (OFLX) Data, Abbreviations: counts = how many isolates had this mutation, no\_data = how many isolates had this mutation but no data on whether they were phenotypically resistant or not to OFLX, susceptible = how many isolates had this mutation but were phenotypically susceptible to OFLX, resistant = how many isolates had this mutation but were resistant to OFLX

| country                          | OFLX SNP CN 7570 CT gyrA A90V | OFLX SNP CN 7581 GA gyrA D94N | OFLX SNP CN 7582 AC gyrA D94A | OFLX SNP CN 7582 AG gyrA D94G | OFLX gyrA S91P u | OFLX othersnp | OFLX unknown |
|----------------------------------|-------------------------------|-------------------------------|-------------------------------|-------------------------------|------------------|---------------|--------------|
| Azerbaijan                       | 0                             | 0                             | 0                             | 0                             | 0                | 0             | 0            |
| Bangladesh                       | 0                             | 0                             | 0                             | 0                             | 0                | 0             | 0            |
| Belarus                          | 23                            | 2                             | 11                            | 21                            | 0                | 3             | 0            |
| Brazil                           | 0                             | 0                             | 0                             | 0                             | 0                | 0             | 0            |
| Burma                            | 0                             | 0                             | 1                             | 0                             | 0                | 0             | 0            |
| Canada                           | 0                             | 0                             | 0                             | 0                             | 0                | 0             | 0            |
| China                            | 11                            | 1                             | 7                             | 18                            | 3                | 6             | 13           |
| Colombia                         | 0                             | 0                             | 0                             | 0                             | 0                | 0             | 0            |
| Democratic Republic of the Congo | 0                             | 0                             | 0                             | 0                             | 0                | 0             | 0            |
| Denmark                          | 0                             | 0                             | 0                             | 0                             | 0                | 0             | 0            |
| Djibouti                         | 0                             | 0                             | 0                             | 0                             | 0                | 0             | 0            |
| Dominican Republic               | 0                             | 0                             | 0                             | 0                             | 0                | 0             | 0            |
| Estonia                          | 0                             | 0                             | 0                             | 1                             | 0                | 0             | 0            |
| Georgia                          | 0                             | 0                             | 0                             | 0                             | 0                | 0             | 0            |
| Germany                          | 0                             | 1                             | 1                             | 2                             | 0                | 1             | 0            |
| Guinea                           | 0                             | 0                             | 0                             | 0                             | 0                | 0             | 0            |
| India                            | 2                             | 0                             | 0                             | 2                             | 0                | 0             | 0            |
| Indonesia                        | 0                             | 0                             | 0                             | 0                             | 0                | 0             | 0            |
| Iran                             | 3                             | 0                             | 1                             | 6                             | 0                | 0             | 0            |
| Kazakhstan                       | 0                             | 0                             | 0                             | 0                             | 0                | 0             | 0            |
| Malawi                           | 0                             | 0                             | 0                             | 0                             | 0                | 0             | 0            |
| Mali                             | 1                             | 0                             | 0                             | 0                             | 0                | 0             | 0            |
| Moldova                          | 0                             | 0                             | 0                             | 0                             | 0                | 0             | 0            |
| Morocco                          | 0                             | 0                             | 0                             | 0                             | 0                | 0             | 0            |
| Nepal                            | 0                             | 0                             | 0                             | 0                             | 0                | 0             | 0            |
| Netherlands                      | 0                             | 0                             | 0                             | 1                             | 0                | 0             | 0            |
| Nigeria                          | 0                             | 0                             | 0                             | 0                             | 0                | 0             | 0            |
| Not Provided                     | 57                            | 12                            | 25                            | 86                            | 26               | 49            | 97           |
| Pakistan                         | 1                             | 0                             | 0                             | 0                             | 0                | 0             | 0            |
| Peru                             | 20                            | 8                             | 9                             | 29                            | 0                | 3             | 3            |
| Philippines                      | 0                             | 0                             | 0                             | 0                             | 0                | 0             | 0            |
| Portugal                         | 0                             | 0                             | 0                             | 0                             | 0                | 0             | 0            |
| Romania                          | 2                             | 0                             | 3                             | 1                             | 0                | 4             | 2            |
| Russia                           | 10                            | 7                             | 12                            | 31                            | 5                | 11            | 57           |
| Rwanda                           | 1                             | 0                             | 0                             | 0                             | 0                | 0             | 0            |
| Sierra Leone                     | 0                             | 0                             | 0                             | 0                             | 0                | 0             | 0            |
| South Africa                     | 78                            | 6                             | 21                            | 44                            | 1                | 22            | 16           |
| South Korea                      | 13                            | 2                             | 2                             | 14                            | 0                | 0             | 0            |
| Spain                            | 0                             | 0                             | 0                             | 0                             | 0                | 0             | 0            |
| Swaziland                        | 0                             | 0                             | 0                             | 0                             | 0                | 0             | 0            |
| Thailand                         | 0                             | 0                             | 0                             | 0                             | 0                | 0             | 0            |
| Turkmenistan                     | 0                             | 0                             | 0                             | 0                             | 0                | 0             | 0            |
| Uganda                           | 0                             | 0                             | 0                             | 0                             | 1                | 1             | 0            |
| United Kingdom                   | 7                             | 2                             | 1                             | 30                            | 3                | 1             | 0            |
| Uzbekistan                       | 0                             | 0                             | 0                             | 0                             | 0                | 0             | 7            |
| Vietnam                          | 0                             | 0                             | 0                             | 0                             | 0                | 0             | 0            |

| resistance mutation            | counts | no data | susceptible | resistant |
|--------------------------------|--------|---------|-------------|-----------|
| OFLX SNP CN 7582 AG gyrA D94G  | 286    | 89      | 30          | 167       |
| OFLX SNP CN 7570 CT gyrA A90V  | 229    | 62      | 75          | 92        |
| OFLX unknown                   | 195    | 0       | 0           | 195       |
| OFLX SNP CN 7582 AC gyrA D94A  | 94     | 19      | 23          | 52        |
| OFLX SNP CN 7581 GA gyrA D94N  | 41     | 14      | 5           | 22        |
| OFLX gyrA S91P u               | 39     | 0       | 0           | 39        |
| OFLX gyrA D94Y u               | 22     | 0       | 0           | 22        |
| OFLX SNP CN 7581 GC gyrA D94H  | 14     | 3       | 5           | 6         |
| OFLX SNP CN 6735 AC gyrB N538T | 10     | 6       | 1           | 3         |
| OFLX gyrA G88C u               | 4      | 0       | 0           | 4         |
| OFLX gyrB D500N u              | 4      | 0       | 0           | 4         |
| OFLX gyrB V340L u              | 4      | 0       | 0           | 4         |
| OFLX gyrA Q613E u              | 3      | 0       | 0           | 3         |
| OFLX gyrB D500H u              | 3      | 0       | 0           | 3         |
| OFLX gyrA A74S u               | 2      | 0       | 0           | 2         |
| OFLX gyrA N282K u              | 2      | 0       | 0           | 2         |
| OFLX gyrA T267I u              | 2      | 0       | 0           | 2         |
| OFLX gyrB E540D u              | 2      | 0       | 0           | 2         |
| OFLX gyrB P133L u              | 2      | 0       | 0           | 2         |
| OFLX gyrB S486F u              | 2      | 0       | 0           | 2         |
| OFLX gyrA A288D u              | 1      | 0       | 0           | 1         |
| OFLX gyrA A463S u              | 1      | 0       | 0           | 1         |
| OFLX gyrA A90G u               | 1      | 0       | 0           | 1         |
| OFLX gyrA D829E u              | 1      | 0       | 0           | 1         |
| OFLX gyrA D89N u               | 1      | 0       | 0           | 1         |
| OFLX gyrA D94V u               | 1      | 0       | 0           | 1         |
| OFLX gyrA E214D u              | 1      | 0       | 0           | 1         |
| OFLX gyrA G88A u               | 1      | 0       | 0           | 1         |
| OFLX gyrA P472S u              | 1      | 0       | 0           | 1         |
| OFLX gyrA R292G u              | 1      | 0       | 0           | 1         |
| OFLX gyrA R382L u              | 1      | 0       | 0           | 1         |
| OFLX gyrA R448H u              | 1      | 0       | 0           | 1         |
| OFLX gyrA R592S u              | 1      | 0       | 0           | 1         |
| OFLX gyrA T135S u              | 1      | 0       | 0           | 1         |
| OFLX gyrB A471V u              | 1      | 0       | 0           | 1         |
| OFLX gyrB A543T u              | 1      | 0       | 0           | 1         |
| OFLX gyrB H350Y u              | 1      | 0       | 0           | 1         |
| OFLX gyrB I39V u               | 1      | 0       | 0           | 1         |
| OFLX gyrB N538D u              | 1      | 0       | 0           | 1         |
| OFLX gyrB N538Y u              | 1      | 0       | 0           | 1         |
| OFLX gyrB P439R u              | 1      | 0       | 0           | 1         |
| OFLX gyrB R485C u              | 1      | 0       | 0           | 1         |
| OFLX gyrB T539N u              | 1      | 0       | 0           | 1         |
| OFLX gyrB V496L u              | 1      | 0       | 0           | 1         |
| OFLX gyrB V600A u              | 1      | 0       | 0           | 1         |

Para-aminosalicylic acid (PAS) Data, Abbreviations: counts = how many isolates had this mutation, no\_data = how many isolates had this mutation but no data on whether they were phenotypically resistant or not to PAS, susceptible = how many isolates had this mutation but were phenotypically susceptible to PAS, resistant = how many isolates had this mutation but were resistant to PAS

| country                          | PAS_SNP_CN_3073852_TC_thyA_H207R | PAS_SNP_CN_3074182_TC_thyA_Q97R | PAS_SNP_CN_3074449_AT_thyA_L8Q | PAS_inter-thyX-hsdS.1_G228A_u | PAS_othersnp | PAS_thyA_T202A_u | PAS_unknown |
|----------------------------------|----------------------------------|---------------------------------|--------------------------------|-------------------------------|--------------|------------------|-------------|
| Azerbaijan                       | 0                                | 0                               | 0                              | 0                             | 0            | 0                | 0           |
| Bangladesh                       | 0                                | 0                               | 0                              | 0                             | 0            | 0                | 0           |
| Belarus                          | 0                                | 0                               | 0                              | 0                             | 0            | 0                | 0           |
| Brazil                           | 0                                | 0                               | 0                              | 0                             | 0            | 0                | 0           |
| Burma                            | 0                                | 0                               | 0                              | 0                             | 0            | 0                | 0           |
| Canada                           | 0                                | 0                               | 0                              | 0                             | 0            | 0                | 0           |
| China                            | 1                                | 0                               | 0                              | 0                             | 0            | 0                | 0           |
| Colombia                         | 0                                | 0                               | 0                              | 0                             | 0            | 0                | 0           |
| Democratic Republic of the Congo | 0                                | 0                               | 0                              | 0                             | 0            | 0                | 0           |
| Denmark                          | 0                                | 0                               | 0                              | 0                             | 0            | 0                | 0           |
| Djibouti                         | 0                                | 0                               | 0                              | 0                             | 0            | 0                | 0           |
| Dominican Republic               | 0                                | 0                               | 0                              | 0                             | 0            | 0                | 0           |
| Estonia                          | 0                                | 0                               | 0                              | 0                             | 0            | 0                | 0           |
| Georgia                          | 0                                | 0                               | 0                              | 0                             | 0            | 0                | 0           |
| Germany                          | 0                                | 0                               | 0                              | 0                             | 0            | 0                | 0           |
| Guinea                           | 0                                | 0                               | 0                              | 0                             | 0            | 0                | 0           |
| India                            | 0                                | 0                               | 0                              | 0                             | 0            | 0                | 0           |
| Indonesia                        | 0                                | 0                               | 0                              | 0                             | 0            | 0                | 0           |
| Iran                             | 0                                | 0                               | 0                              | 0                             | 0            | 0                | 0           |
| Kazakhstan                       | 0                                | 0                               | 0                              | 0                             | 0            | 0                | 0           |
| Malawi                           | 0                                | 0                               | 0                              | 0                             | 0            | 0                | 0           |
| Mali                             | 0                                | 0                               | 0                              | 0                             | 0            | 0                | 0           |
| Moldova                          | 0                                | 0                               | 0                              | 0                             | 0            | 0                | 0           |
| Morocco                          | 0                                | 0                               | 0                              | 0                             | 0            | 0                | 0           |
| Nepal                            | 0                                | 0                               | 0                              | 0                             | 0            | 0                | 0           |
| Netherlands                      | 0                                | 0                               | 0                              | 0                             | 0            | 0                | 0           |
| Nigeria                          | 0                                | 0                               | 0                              | 0                             | 0            | 0                | 0           |
| Not Provided                     | 5                                | 2                               | 4                              | 3                             | 15           | 18               | 5           |
| Pakistan                         | 0                                | 0                               | 0                              | 0                             | 0            | 0                | 0           |
| Peru                             | 10                               | 0                               | 4                              | 0                             | 1            | 0                | 0           |
| Philippines                      | 0                                | 0                               | 0                              | 0                             | 0            | 0                | 0           |
| Portugal                         | 0                                | 0                               | 0                              | 0                             | 0            | 0                | 0           |
| Romania                          | 0                                | 0                               | 0                              | 0                             | 0            | 0                | 0           |
| Russia                           | 0                                | 1                               | 0                              | 0                             | 1            | 0                | 0           |
| Rwanda                           | 0                                | 0                               | 0                              | 0                             | 0            | 0                | 0           |
| Sierra Leone                     | 0                                | 0                               | 0                              | 0                             | 0            | 0                | 0           |
| South Africa                     | 0                                | 0                               | 0                              | 1                             | 2            | 0                | 3           |
| South Korea                      | 0                                | 0                               | 0                              | 6                             | 6            | 0                | 3           |
| Spain                            | 0                                | 0                               | 0                              | 0                             | 0            | 0                | 0           |
| Swaziland                        | 0                                | 0                               | 0                              | 0                             | 0            | 0                | 0           |
| Thailand                         | 0                                | 0                               | 0                              | 0                             | 0            | 0                | 0           |
| Turkmenistan                     | 0                                | 0                               | 0                              | 0                             | 0            | 0                | 0           |
| Uganda                           | 0                                | 0                               | 0                              | 0                             | 0            | 0                | 0           |
| United Kingdom                   | 0                                | 1                               | 0                              | 0                             | 0            | 0                | 0           |
| Uzbekistan                       | 0                                | 0                               | 0                              | 0                             | 0            | 0                | 0           |
| Vietnam                          | 0                                | 0                               | 0                              | 0                             | 0            | 0                | 0           |

| resistance mutation                                                                        | counts | no data | susceptible | resistant |
|--------------------------------------------------------------------------------------------|--------|---------|-------------|-----------|
| PAS thyA T202A u                                                                           | 18     | 0       | 0           | 18        |
| PAS SNP CN 3073852 TC thyA H207R                                                           | 16     | 14      | 0           | 2         |
| PAS unknown                                                                                | 11     | 0       | 0           | 11        |
| PAS upstream intergenic-thyX-hsdS.1 G228A u                                                | 10     | 0       | 0           | 10        |
| PAS SNP CN 3074449 AT thyA L8Q                                                             | 8      | 7       | 0           | 1         |
| PAS SNP CN 3074182 TC thyA Q97R                                                            | 4      | 3       | 0           | 1         |
| PAS folC R49Q u                                                                            | 2      | 0       | 0           | 2         |
| PAS folC R49W u                                                                            | 2      | 0       | 0           | 2         |
| PAS upstream intergenic-thyX-hsdS.1 C235T u                                                | 2      | 0       | 0           | 2         |
| PAS upstream intergenic-thyA G24A u                                                        | 2      | 0       | 0           | 2         |
| PAS folC E153G u                                                                           | 1      | 0       | 0           | 1         |
| PAS folC I43S u                                                                            | 1      | 0       | 0           | 1         |
| PAS folC I43T u                                                                            | 1      | 0       | 0           | 1         |
| PAS folC I43V u                                                                            | 1      | 0       | 0           | 1         |
| PAS folC S98G u                                                                            | 1      | 0       | 0           | 1         |
| PAS upstream intergenic-thyX-hsdS.1 C226A u                                                | 1      | 0       | 0           | 1         |
| PAS upstream intergenic-thyX-hsdS.1 G240A u                                                | 1      | 0       | 0           | 1         |
| PAS upstream intergenic-thyA T117C u                                                       | 1      | 0       | 0           | 1         |
| PAS upstream intergenic-thyA d49CCGCAGCGACTCGCCGCCAAACAAACCCAGCGGGCGATCGCAAGCGCGCGAAGCCG u | 1      | 0       | 0           | 1         |
| PAS thyA A262V u                                                                           | 1      | 0       | 0           | 1         |
| PAS thyA D6G u                                                                             | 1      | 0       | 0           | 1         |
| PAS thyA D81A u                                                                            | 1      | 0       | 0           | 1         |
| PAS thyA E137G u                                                                           | 1      | 0       | 0           | 1         |
| PAS thyA E58V u                                                                            | 1      | 0       | 0           | 1         |
| PAS thyA F152V u                                                                           | 1      | 0       | 0           | 1         |
| PAS thyA P145L u                                                                           | 1      | 0       | 0           | 1         |
| PAS thyA T22P u                                                                            | 1      | 0       | 0           | 1         |
| PAS SNP P 3074479 AG.157 thyA                                                              | 0      | 0       | 0           | 0         |

Pyrazinamide (PZA) Data, Abbreviations: counts = how many isolates had this mutation, no\_data = how many isolates had this mutation but no data on whether they were phenotypically resistant or not to PZA, susceptible = how many isolates had this mutation but were phenotypically susceptible to PZA, resistant = how many isolates had this mutation but were resistant to PZA

| country                          | PZA_SNP_CN_2289090_TC_pncA_H51R | PZA_SNP_CN_2289099_TG_pncA_K48T | PZA_SNP_CN_2289213_TC_pncA_Q10R | PZA_SNP_CN_2289213_TG_pncA_Q10P | PZA_othersnp | PZA_promoter-pncA_T11C_u | PZA_unknown |
|----------------------------------|---------------------------------|---------------------------------|---------------------------------|---------------------------------|--------------|--------------------------|-------------|
| Azerbaijan                       | 0                               | 0                               | 0                               | 1                               | 0            | 0                        | 0           |
| Bangladesh                       | 0                               | 0                               | 0                               | 0                               | 0            | 0                        | 0           |
| Belarus                          | 0                               | 0                               | 2                               | 0                               | 56           | 0                        | 0           |
| Brazil                           | 0                               | 0                               | 0                               | 0                               | 0            | 0                        | 0           |
| Burma                            | 0                               | 0                               | 0                               | 0                               | 1            | 0                        | 0           |
| Canada                           | 0                               | 0                               | 0                               | 0                               | 0            | 0                        | 0           |
| China                            | 0                               | 0                               | 0                               | 2                               | 22           | 0                        | 0           |
| Colombia                         | 0                               | 0                               | 0                               | 0                               | 0            | 0                        | 0           |
| Democratic Republic of the Congo | 0                               | 0                               | 0                               | 0                               | 0            | 0                        | 0           |
| Denmark                          | 0                               | 0                               | 0                               | 0                               | 0            | 0                        | 0           |
| Djibouti                         | 0                               | 0                               | 0                               | 0                               | 0            | 0                        | 0           |
| Dominican Republic               | 0                               | 0                               | 0                               | 0                               | 0            | 0                        | 0           |
| Estonia                          | 0                               | 0                               | 0                               | 0                               | 0            | 0                        | 0           |
| Georgia                          | 0                               | 0                               | 0                               | 0                               | 0            | 0                        | 0           |
| Germany                          | 0                               | 0                               | 0                               | 0                               | 14           | 0                        | 5           |
| Guinea                           | 0                               | 0                               | 0                               | 0                               | 1            | 0                        | 0           |
| India                            | 0                               | 0                               | 0                               | 0                               | 2            | 0                        | 0           |
| Indonesia                        | 0                               | 0                               | 0                               | 0                               | 0            | 0                        | 0           |
| Iran                             | 0                               | 0                               | 0                               | 0                               | 4            | 0                        | 1           |
| Kazakhstan                       | 0                               | 0                               | 0                               | 0                               | 0            | 0                        | 0           |
| Malawi                           | 0                               | 0                               | 0                               | 0                               | 4            | 0                        | 0           |
| Mali                             | 0                               | 0                               | 0                               | 0                               | 3            | 0                        | 0           |
| Moldova                          | 0                               | 0                               | 0                               | 2                               | 6            | 0                        | 0           |
| Morocco                          | 0                               | 0                               | 0                               | 0                               | 0            | 0                        | 0           |
| Nepal                            | 0                               | 0                               | 0                               | 0                               | 0            | 0                        | 0           |
| Netherlands                      | 0                               | 0                               | 0                               | 0                               | 0            | 0                        | 0           |
| Nigeria                          | 0                               | 0                               | 0                               | 0                               | 0            | 0                        | 0           |
| Not Provided                     | 10                              | 12                              | 6                               | 6                               | 260          | 15                       | 78          |
| Pakistan                         | 0                               | 0                               | 0                               | 0                               | 0            | 0                        | 0           |
| Peru                             | 79                              | 35                              | 45                              | 9                               | 296          | 8                        | 150         |
| Philippines                      | 0                               | 0                               | 0                               | 0                               | 0            | 0                        | 0           |
| Portugal                         | 0                               | 0                               | 0                               | 0                               | 0            | 0                        | 0           |
| Romania                          | 0                               | 0                               | 0                               | 0                               | 20           | 0                        | 0           |
| Russia                           | 2                               | 0                               | 0                               | 1                               | 121          | 6                        | 71          |
| Rwanda                           | 0                               | 0                               | 0                               | 0                               | 0            | 0                        | 1           |
| Sierra Leone                     | 0                               | 0                               | 0                               | 0                               | 4            | 1                        | 3           |
| South Africa                     | 0                               | 0                               | 0                               | 3                               | 112          | 0                        | 66          |
| South Korea                      | 0                               | 0                               | 0                               | 0                               | 23           | 0                        | 24          |
| Spain                            | 0                               | 0                               | 0                               | 0                               | 0            | 0                        | 0           |
| Swaziland                        | 0                               | 0                               | 0                               | 0                               | 0            | 0                        | 0           |
| Thailand                         | 0                               | 0                               | 0                               | 0                               | 0            | 0                        | 0           |
| Turkmenistan                     | 0                               | 0                               | 0                               | 0                               | 0            | 1                        | 2           |
| Uganda                           | 0                               | 0                               | 0                               | 0                               | 12           | 1                        | 10          |
| United Kingdom                   | 0                               | 0                               | 0                               | 0                               | 41           | 2                        | 19          |
| Uzbekistan                       | 1                               | 0                               | 2                               | 39                              | 69           | 17                       | 40          |
| Vietnam                          | 0                               | 0                               | 0                               | 0                               | 0            | 0                        | 0           |



| resistance mutation                  | counts | no data | susceptible | resistant |
|--------------------------------------|--------|---------|-------------|-----------|
| PZA unknown                          | 470    | 0       | 0           | 470       |
| PZA SNP CN 2289090 TC pncA H51R      | 92     | 12      | 9           | 71        |
| PZA SNP CN 2289213 TG pncA Q10P      | 63     | 11      | 4           | 48        |
| PZA SNP CN 2289213 TC pncA Q10R      | 55     | 4       | 5           | 46        |
| PZA upstream intergenic-pncA T11C u  | 51     | 0       | 0           | 51        |
| PZA SNP CN 2289099 TG pncA K48T      | 47     | 9       | 22          | 16        |
| PZA SNP CN 2289202 AG pncA C14R      | 46     | 12      | 0           | 34        |
| PZA SNP CN 2288844 AG pncA I133T     | 40     | 1       | 16          | 23        |
| PZA SNP CN 2289016 TG pncA T76P      | 38     | 23      | 2           | 13        |
| PZA SNP CN 2288883 AG pncA L120P     | 35     | 15      | 0           | 20        |
| PZA SNP CN 2288839 TG pncA T135P     | 34     | 12      | 2           | 20        |
| PZA SNP CN 2289040 AC pncA W68G      | 31     | 22      | 5           | 4         |
| PZA SNP CN 2289073 GC pncA H57D      | 26     | 5       | 0           | 21        |
| PZA SNP CN 2289231 AG pncA L4S       | 25     | 8       | 0           | 17        |
| PZA SNP CN 2288826 AG pncA V139A     | 23     | 5       | 7           | 11        |
| PZA SNP CN 2289142 AC pncA Y34D      | 22     | 19      | 1           | 2         |
| PZA SNP CN 2288820 TG pncA Q141P     | 20     | 7       | 2           | 11        |
| PZA SNP CN 2289081 GA pncA P54L      | 20     | 4       | 4           | 12        |
| PZA SNP CN 2289180 AC pncA V21G      | 20     | 5       | 4           | 11        |
| PZA pncA V125G u                     | 20     | 0       | 0           | 20        |
| PZA SNP CN 2289207 TG pncA D12A      | 19     | 6       | 4           | 9         |
| PZA SNP CN 2288727 AG pncA L172P     | 17     | 11      | 2           | 4         |
| PZA SNP CN 2289097 CT pncA D49N      | 16     | 3       | 1           | 12        |
| PZA SNP CN 2288952 CT pncA G97D      | 15     | 9       | 0           | 6         |
| PZA SNP CN 2288953 CT pncA G97S      | 15     | 3       | 1           | 11        |
| PZA SNP CN 2289040 AG pncA W68R      | 15     | 4       | 2           | 9         |
| PZA DEL F 2288939 d302TCGGTGTAG pncA | 13     | 9       | 0           | 4         |
| PZA SNP CN 2288805 GA pncA A146V     | 13     | 9       | 0           | 4         |
| PZA SNP CN 2289054 TG pncA D63A      | 12     | 2       | 3           | 7         |
| PZA SNP CN 2289070 AG pncA F58L      | 12     | 4       | 3           | 5         |
| PZA SNP CN 2288805 GT pncA A146E     | 11     | 0       | 4           | 7         |
| PZA SNP CN 2289207 TC pncA D12G      | 11     | 1       | 2           | 8         |
| PZA pncA I6L u                       | 11     | 0       | 0           | 11        |
| PZA DEL F 2289069 d172A pncA F58L    | 10     | 6       | 0           | 4         |
| PZA SNP CN 2288703 AC pncA V180G     | 10     | 2       | 0           | 8         |
| PZA SNP CN 2288764 TC pncA T160A     | 10     | 3       | 0           | 7         |
| PZA SNP CN 2288827 CT pncA V139M     | 10     | 3       | 1           | 6         |
| PZA SNP CN 2289220 CT pncA D8N       | 10     | 6       | 0           | 4         |
| PZA SNP CN 2288704 CA pncA V180F     | 9      | 0       | 2           | 7         |
| PZA INS F 2289009 i232C pncA G78G    | 8      | 3       | 1           | 4         |
| PZA INS F 2289050 i191T pncA Y64     | 8      | 3       | 1           | 4         |
| PZA SNP CN 2288850 AC pncA V131G     | 8      | 3       | 1           | 4         |
| PZA SNP CN 2288859 AC pncA V128G     | 8      | 1       | 2           | 5         |
| PZA upstream intergenic-pncA T11G u  | 8      | 0       | 0           | 8         |
| PZA SNP CN 2288778 AC pncA V155G     | 7      | 3       | 1           | 3         |
| PZA SNP CN 2288943 GA pncA T100I     | 7      | 0       | 1           | 6         |
| PZA SNP CN 2288988 AG pncA L85P      | 7      | 2       | 1           | 4         |
| PZA SNP CN 2289043 AG pncA S67P      | 7      | 1       | 0           | 6         |
| PZA SNP CN 2289072 TC pncA H57R      | 7      | 2       | 0           | 5         |
| PZA SNP CN 2288696 CA pncA L182F     | 6      | 0       | 5           | 1         |
| PZA SNP CN 2288835 TC pncA D136G     | 6      | 3       | 1           | 2         |
| PZA SNP CN 2288965 CA pncA V93L      | 6      | 0       | 1           | 5         |
| PZA SNP CN 2289072 TA pncA H57L      | 6      | 0       | 1           | 5         |
| PZA SNP CN 2289103 TC pncA T47A      | 6      | 2       | 3           | 1         |
| PZA DEL F 2288923 d318C pncA         | 5      | 2       | 1           | 2         |
| PZA INS F 2288825 i416C pncA         | 5      | 1       | 0           | 4         |
| PZA INS F 2288851 i390CC pncA        | 5      | 1       | 1           | 3         |
| PZA INS F 2288942 i299T pncA         | 5      | 2       | 1           | 2         |
| PZA SNP CN 2288697 AG pncA L182S     | 5      | 2       | 2           | 1         |
| PZA SNP CN 2288718 AG pncA M175T     | 5      | 2       | 0           | 3         |
| PZA SNP CN 2288938 CG pncA A102P     | 5      | 2       | 2           | 1         |
| PZA SNP CN 2288944 TG pncA T100P     | 5      | 1       | 0           | 4         |
| PZA SNP CN 2288956 TC pncA K96E      | 5      | 1       | 0           | 4         |
| PZA SNP CN 2288973 AG pncA I90T      | 5      | 1       | 1           | 3         |
| PZA SNP CN 2289028 AG pncA C72R      | 5      | 2       | 1           | 2         |
| PZA SNP CN 2289030 TC pncA H71R      | 5      | 0       | 3           | 2         |
| PZA SNP CN 2289162 AG pncA L27P      | 5      | 1       | 2           | 2         |
| PZA SNP CN 2289219 TC pncA D8G       | 5      | 2       | 1           | 2         |
| PZA pncA C138R u                     | 5      | 0       | 0           | 5         |
| PZA pncA D8E u                       | 5      | 0       | 0           | 5         |
| PZA pncA S164P u                     | 5      | 0       | 0           | 5         |
| PZA INS F 2288851 i390C pncA         | 4      | 2       | 0           | 2         |
| PZA INS F 2288887 i354A pncA         | 4      | 2       | 0           | 2         |
| PZA SNP CN 2288766 AC pncA L159R     | 4      | 0       | 0           | 4         |
| PZA SNP CN 2288818 TC pncA T142A     | 4      | 2       | 0           | 2         |
| PZA SNP CN 2288841 GA pncA A134V     | 4      | 2       | 0           | 2         |
| PZA SNP CN 2288955 TG pncA K96T      | 4      | 1       | 0           | 3         |
| PZA SNP CN 2289037 GA pncA P69S      | 4      | 0       | 4           | 0         |
| PZA pncA F13L u                      | 4      | 0       | 0           | 4         |
| PZA pncA M1T u                       | 4      | 0       | 0           | 4         |
| PZA pncA R140P u                     | 4      | 0       | 0           | 4         |
| PZA pncA V7G u                       | 4      | 0       | 0           | 4         |
| PZA DEL F 2288776 d465GCACCTG pncA   | 3      | 1       | 1           | 1         |
| PZA INS F 2288725 i516C pncA         | 3      | 1       | 0           | 2         |
| PZA SNP CN 2288775 AG pncA L156P     | 3      | 2       | 0           | 1         |
| PZA SNP CN 2288883 AC pncA L120R     | 3      | 1       | 0           | 2         |
| PZA SNP CN 2289001 AC pncA F81V      | 3      | 0       | 2           | 1         |
| PZA SNP CN 2289015 GA pncA T76I      | 3      | 1       | 1           | 1         |
| PZA SNP CN 2289054 TC pncA D63G      | 3      | 0       | 1           | 2         |
| PZA SNP CN 2289073 GA pncA H57Y      | 3      | 0       | 0           | 3         |
| PZA pncA C14G u                      | 3      | 0       | 0           | 3         |
| PZA pncA D136Y u                     | 3      | 0       | 0           | 3         |
| PZA pncA H51Q u                      | 3      | 0       | 0           | 3         |
| PZA pncA H82R u                      | 3      | 0       | 0           | 3         |
| PZA pncA L116R u                     | 3      | 0       | 0           | 3         |
| PZA pncA L4W u                       | 3      | 0       | 0           | 3         |
| PZA pncA P54Q u                      | 3      | 0       | 0           | 3         |
| PZA pncA P62S u                      | 3      | 0       | 0           | 3         |
| PZA upstream intergenic-pncA A12G u  | 3      | 0       | 0           | 3         |

|                                     |   |   |   |   |
|-------------------------------------|---|---|---|---|
| PZA upstream intergenic-pncA A12G u | 3 | 0 | 0 | 3 |
| PZA SNP CN 2288718 AC_pncA M175R    | 2 | 1 | 0 | 1 |
| PZA SNP CN 2288742 GA_pncA T167I    | 2 | 0 | 1 | 1 |
| PZA SNP CN 2288818 TG_pncA T142P    | 2 | 1 | 0 | 1 |
| PZA SNP CN 2288826 AC_pncA V139G    | 2 | 0 | 0 | 2 |
| PZA SNP CN 2288869 CA_pncA V125F    | 2 | 0 | 1 | 1 |
| PZA SNP CN 2288887 AC_pncA W119G    | 2 | 0 | 0 | 2 |
| PZA SNP CN 2288919 CT_pncA G108E    | 2 | 0 | 1 | 1 |
| PZA SNP CN 2288925 AG_pncA F106S    | 2 | 1 | 0 | 1 |
| PZA SNP CN 2288964 AC_pncA V93G     | 2 | 0 | 1 | 1 |
| PZA SNP CN 2289009 CA_pncA G78V     | 2 | 0 | 0 | 2 |
| PZA SNP CN 2289030 TG_pncA H71P     | 2 | 1 | 0 | 1 |
| PZA SNP CN 2289046 AG_pncA S66P     | 2 | 1 | 0 | 1 |
| PZA SNP CN 2289090 TG_pncA H51P     | 2 | 0 | 1 | 1 |
| PZA SNP CN 2289091 GA_pncA H51Y     | 2 | 2 | 0 | 0 |
| PZA SNP CN 2289095 GC_pncA D49E     | 2 | 1 | 0 | 1 |
| PZA SNP CN 2289212 CG_pncA Q10H     | 2 | 0 | 0 | 2 |
| PZA SNP CN 2289216 AC_pncA V9G      | 2 | 1 | 0 | 1 |
| PZA SNP CN 2289228 AG_pncA I5T      | 2 | 0 | 0 | 2 |
| PZA_pncA A46V u                     | 2 | 0 | 0 | 2 |
| PZA_pncA D63H u                     | 2 | 0 | 0 | 2 |
| PZA_pncA D8A u                      | 2 | 0 | 0 | 2 |
| PZA_pncA F94L u                     | 2 | 0 | 0 | 2 |
| PZA_pncA G97C u                     | 2 | 0 | 0 | 2 |
| PZA_pncA H71Q u                     | 2 | 0 | 0 | 2 |
| PZA_pncA H71Y u                     | 2 | 0 | 0 | 2 |
| PZA_pncA H82D u                     | 2 | 0 | 0 | 2 |
| PZA_pncA I6M u                      | 2 | 0 | 0 | 2 |
| PZA_pncA K48E u                     | 2 | 0 | 0 | 2 |
| PZA_pncA L35R u                     | 2 | 0 | 0 | 2 |
| PZA_pncA M175V u                    | 2 | 0 | 0 | 2 |
| PZA_pncA P62L u                     | 2 | 0 | 0 | 2 |
| PZA_pncA P69R u                     | 2 | 0 | 0 | 2 |
| PZA_pncA S104R u                    | 2 | 0 | 0 | 2 |
| PZA_pncA V130M u                    | 2 | 0 | 0 | 2 |
| PZA_pncA V155M u                    | 2 | 0 | 0 | 2 |
| PZA_pncA V44G u                     | 2 | 0 | 0 | 2 |
| PZA_pncA Y103C u                    | 2 | 0 | 0 | 2 |
| PZA_pncA Y95S u                     | 2 | 0 | 0 | 2 |
| PZA upstream intergenic-pncA A7G u  | 2 | 0 | 0 | 2 |
| PZA INS F 2288835_i406T_pncA        | 1 | 0 | 0 | 0 |
| PZA SNP CN 2288697 AC_pncA L182W    | 1 | 1 | 0 | 0 |
| PZA SNP CN 2288730 GA_pncA A171V    | 1 | 1 | 0 | 0 |
| PZA SNP CN 2288817 GA_pncA T142M    | 1 | 1 | 0 | 0 |
| PZA SNP CN 2288847 CT_pncA G132D    | 1 | 0 | 0 | 1 |
| PZA SNP CN 2288935 AG_pncA Y103H    | 1 | 0 | 0 | 1 |
| PZA SNP CN 2289042 GC_pncA S67W     | 1 | 0 | 0 | 1 |
| PZA SNP CN 2289069 AC_pncA F58C     | 1 | 0 | 0 | 1 |
| PZA SNP CN 2289186 AG_pncA L19P     | 1 | 0 | 0 | 1 |
| PZA_pncA A102T u                    | 1 | 0 | 0 | 1 |
| PZA_pncA A146P u                    | 1 | 0 | 0 | 1 |
| PZA_pncA A171E u                    | 1 | 0 | 0 | 1 |
| PZA_pncA A171T u                    | 1 | 0 | 0 | 1 |
| PZA_pncA A3E u                      | 1 | 0 | 0 | 1 |
| PZA_pncA A46E u                     | 1 | 0 | 0 | 1 |
| PZA_pncA A46P u                     | 1 | 0 | 0 | 1 |
| PZA_pncA C14W u                     | 1 | 0 | 0 | 1 |
| PZA_pncA D129Y u                    | 1 | 0 | 0 | 1 |
| PZA_pncA D12N u                     | 1 | 0 | 0 | 1 |
| PZA_pncA D136N u                    | 1 | 0 | 0 | 1 |
| PZA_pncA D49G u                     | 1 | 0 | 0 | 1 |
| PZA_pncA F13I u                     | 1 | 0 | 0 | 1 |
| PZA_pncA F58S u                     | 1 | 0 | 0 | 1 |
| PZA_pncA F81C u                     | 1 | 0 | 0 | 1 |
| PZA_pncA G105D u                    | 1 | 0 | 0 | 1 |
| PZA_pncA G108R u                    | 1 | 0 | 0 | 1 |
| PZA_pncA G132A u                    | 1 | 0 | 0 | 1 |
| PZA_pncA G162D u                    | 1 | 0 | 0 | 1 |
| PZA_pncA G17D u                     | 1 | 0 | 0 | 1 |
| PZA_pncA G24D u                     | 1 | 0 | 0 | 1 |
| PZA_pncA G78C u                     | 1 | 0 | 0 | 1 |
| PZA_pncA G78S u                     | 1 | 0 | 0 | 1 |
| PZA_pncA G97R u                     | 1 | 0 | 0 | 1 |
| PZA_pncA H43P u                     | 1 | 0 | 0 | 1 |
| PZA_pncA H33S u                     | 1 | 0 | 0 | 1 |
| PZA_pncA I6T u                      | 1 | 0 | 0 | 1 |
| PZA_pncA K96R u                     | 1 | 0 | 0 | 1 |
| PZA_pncA L151S u                    | 1 | 0 | 0 | 1 |
| PZA_pncA L156Q u                    | 1 | 0 | 0 | 1 |
| PZA_pncA L159V u                    | 1 | 0 | 0 | 1 |
| PZA_pncA L85R u                     | 1 | 0 | 0 | 1 |
| PZA_pncA M175I u                    | 1 | 0 | 0 | 1 |
| PZA_pncA M175K u                    | 1 | 0 | 0 | 1 |
| PZA_pncA M1I u                      | 1 | 0 | 0 | 1 |
| PZA_pncA P62R u                     | 1 | 0 | 0 | 1 |
| PZA_pncA R154G u                    | 1 | 0 | 0 | 1 |
| PZA_pncA R2W u                      | 1 | 0 | 0 | 1 |
| PZA_pncA S104G u                    | 1 | 0 | 0 | 1 |
| PZA_pncA S32I u                     | 1 | 0 | 0 | 1 |
| PZA_pncA T100A u                    | 1 | 0 | 0 | 1 |
| PZA_pncA T114P u                    | 1 | 0 | 0 | 1 |
| PZA_pncA T160K u                    | 1 | 0 | 0 | 1 |
| PZA_pncA T160P u                    | 1 | 0 | 0 | 1 |
| PZA_pncA T168P u                    | 1 | 0 | 0 | 1 |
| PZA_pncA V139L u                    | 1 | 0 | 0 | 1 |
| PZA_pncA V155A u                    | 1 | 0 | 0 | 1 |
| PZA_pncA V163A u                    | 1 | 0 | 0 | 1 |
| PZA_pncA V7F u                      | 1 | 0 | 0 | 1 |
| PZA_pncA W7L u                      | 1 | 0 | 0 | 1 |
| PZA_pncA W119R u                    | 1 | 0 | 0 | 1 |
| PZA_pncA W68C u                     | 1 | 0 | 0 | 1 |
| PZA_pncA W68L u                     | 1 | 0 | 0 | 1 |
| PZA_pncA Y103D u                    | 1 | 0 | 0 | 1 |
| PZA_pncA Y64D u                     | 1 | 0 | 0 | 1 |
| PZA upstream intergenic-pncA T11A u | 1 | 0 | 0 | 1 |
| PZA upstream intergenic-pncA T15C u | 1 | 0 | 0 | 1 |
| PZA upstream intergenic-pncA T16C u | 1 | 0 | 0 | 1 |
| PZA upstream intergenic-pncA d10A u | 1 | 0 | 0 | 1 |
| PZA upstream intergenic-pncA i14T u | 1 | 0 | 0 | 1 |
| PZA DEL F 2288697_d544AACT_pncA     | 0 | 0 | 0 | 0 |
| PZA DEL F 2289060_d181GTGCCGGA_pncA | 0 | 0 | 0 | 0 |
| PZA DEL N 2288942_d299GGTGTA_pncA   | 0 | 0 | 0 | 0 |
| PZA SNP CN 2288784 GT_pncA T153N    | 0 | 0 | 0 | 0 |
| PZA SNP CN 2288848 CT_pncA G132S    | 0 | 0 | 0 | 0 |
| PZA SNP CN 2288853 AC_pncA V130G    | 0 | 0 | 0 | 0 |
| PZA SNP CN 2288853 AT_pncA V130E    | 0 | 0 | 0 | 0 |
| PZA SNP CN 2288878 GA_pncA Q122     | 0 | 0 | 0 | 0 |
| PZA SNP CN 2288933 GC_pncA Y103     | 0 | 0 | 0 | 0 |
| PZA SNP CN 2288956 TG_pncA K96Q     | 0 | 0 | 0 | 0 |
| PZA SNP CN 2289042 GT_pncA S67      | 0 | 0 | 0 | 0 |
| PZA SNP CN 2289050 AT_pncA Y64      | 0 | 0 | 0 | 0 |
| PZA SNP CN 2289150 AC_pncA B1S      | 0 | 0 | 0 | 0 |
| PZA SNP CN 2289206 GC_pncA D12E     | 0 | 0 | 0 | 0 |
| PZA SNP CN 2289214 GA_pncA Q10      | 0 | 0 | 0 | 0 |
| PZA SNP P 2289245_TA_37_pncA        | 0 | 0 | 0 | 0 |
| PZA SNP P 2289251_AC_31_pncA        | 0 | 0 | 0 | 0 |
| PZA SNP P 2289252_TC_30_pncA        | 0 | 0 | 0 | 0 |
| PZA SNP P 2289252_TG_30_pncA        | 0 | 0 | 0 | 0 |

Rifamycin (RIF) Data, Abbreviations: counts = how many isolates had this mutation, no\_data = how many isolates had this mutation but no data on whether they were phenotypically resistant or not to RIF, susceptible = how many isolates had this mutation but were phenotypically susceptible to RIF, resistant = how many isolates had this mutation but were resistant to RIF

| country                          | RIF_SNP_CN_761109_GT_rpoB_D435Y | RIF_SNP_CN_761110_AT_rpoB_D435V | RIF_SNP_CN_761139_CT_rpoB_H445Y | RIF_SNP_CN_761155_CT_rpoB_S450L | RIF_SNP_CN_761161_TC_rpoB_L452P | RIF_othersnp | RIF_unknown |
|----------------------------------|---------------------------------|---------------------------------|---------------------------------|---------------------------------|---------------------------------|--------------|-------------|
| Azerbaijan                       | 0                               | 0                               | 0                               | 1                               | 0                               | 0            | 0           |
| Bangladesh                       | 0                               | 0                               | 0                               | 0                               | 0                               | 0            | 1           |
| Belarus                          | 3                               | 0                               | 1                               | 77                              | 0                               | 20           | 0           |
| Brazil                           | 0                               | 0                               | 0                               | 0                               | 0                               | 0            | 0           |
| Burma                            | 0                               | 0                               | 0                               | 1                               | 0                               | 0            | 0           |
| Canada                           | 0                               | 0                               | 0                               | 0                               | 0                               | 0            | 0           |
| China                            | 3                               | 4                               | 11                              | 57                              | 9                               | 36           | 5           |
| Colombia                         | 0                               | 0                               | 0                               | 0                               | 0                               | 0            | 1           |
| Democratic Republic of the Congo | 0                               | 0                               | 0                               | 0                               | 0                               | 0            | 0           |
| Denmark                          | 0                               | 0                               | 0                               | 0                               | 0                               | 0            | 0           |
| Djibouti                         | 0                               | 0                               | 0                               | 0                               | 0                               | 0            | 0           |
| Dominican Republic               | 0                               | 0                               | 0                               | 0                               | 0                               | 0            | 0           |
| Estonia                          | 0                               | 0                               | 0                               | 2                               | 0                               | 0            | 0           |
| Georgia                          | 0                               | 0                               | 0                               | 4                               | 1                               | 0            | 0           |
| Germany                          | 0                               | 1                               | 1                               | 13                              | 1                               | 5            | 1           |
| Guinea                           | 0                               | 0                               | 0                               | 1                               | 0                               | 0            | 0           |
| India                            | 0                               | 2                               | 0                               | 8                               | 0                               | 0            | 0           |
| Indonesia                        | 0                               | 0                               | 0                               | 0                               | 0                               | 0            | 0           |
| Iran                             | 0                               | 0                               | 0                               | 10                              | 0                               | 2            | 1           |
| Kazakhstan                       | 0                               | 0                               | 0                               | 2                               | 0                               | 0            | 0           |
| Malawi                           | 0                               | 1                               | 0                               | 4                               | 0                               | 1            | 1           |
| Mali                             | 0                               | 8                               | 0                               | 4                               | 3                               | 5            | 0           |
| Moldova                          | 1                               | 0                               | 0                               | 34                              | 0                               | 4            | 0           |
| Morocco                          | 0                               | 0                               | 0                               | 0                               | 0                               | 1            | 0           |
| Nepal                            | 0                               | 0                               | 0                               | 1                               | 0                               | 1            | 0           |
| Netherlands                      | 0                               | 0                               | 0                               | 0                               | 0                               | 0            | 0           |
| Nigeria                          | 0                               | 0                               | 0                               | 1                               | 0                               | 0            | 0           |
| Not Provided                     | 42                              | 73                              | 49                              | 515                             | 18                              | 123          | 57          |
| Pakistan                         | 0                               | 0                               | 0                               | 1                               | 0                               | 0            | 0           |
| Peru                             | 22                              | 134                             | 28                              | 491                             | 10                              | 110          | 57          |
| Philippines                      | 0                               | 0                               | 0                               | 1                               | 0                               | 0            | 1           |
| Portugal                         | 0                               | 0                               | 0                               | 1                               | 0                               | 0            | 0           |
| Romania                          | 6                               | 4                               | 2                               | 19                              | 0                               | 3            | 0           |
| Russia                           | 6                               | 7                               | 3                               | 350                             | 6                               | 28           | 74          |
| Rwanda                           | 0                               | 1                               | 0                               | 3                               | 0                               | 0            | 1           |
| Sierra Leone                     | 2                               | 0                               | 3                               | 6                               | 1                               | 2            | 1           |
| South Africa                     | 10                              | 55                              | 15                              | 188                             | 62                              | 36           | 8           |
| South Korea                      | 4                               | 3                               | 2                               | 35                              | 1                               | 1            | 3           |
| Spain                            | 0                               | 0                               | 0                               | 1                               | 1                               | 0            | 0           |
| Swaziland                        | 0                               | 0                               | 0                               | 2                               | 0                               | 0            | 0           |
| Thailand                         | 0                               | 0                               | 0                               | 0                               | 0                               | 0            | 0           |
| Turkmenistan                     | 0                               | 0                               | 0                               | 1                               | 0                               | 0            | 0           |
| Uganda                           | 1                               | 3                               | 2                               | 25                              | 0                               | 14           | 4           |
| United Kingdom                   | 3                               | 5                               | 7                               | 54                              | 6                               | 65           | 3           |
| Uzbekistan                       | 3                               | 8                               | 7                               | 213                             | 4                               | 18           | 13          |
| Vietnam                          | 0                               | 0                               | 0                               | 0                               | 0                               | 0            | 0           |

| resistance mutation             | counts | no data | susceptible | resistant |
|---------------------------------|--------|---------|-------------|-----------|
| RIF SNP CN 761155 CT rpoB S450L | 2126   | 232     | 228         | 1666      |
| RIF SNP CN 761110 AT rpoB D435V | 309    | 19      | 27          | 263       |
| RIF unknown                     | 232    | 0       | 0           | 232       |
| RIF SNP CN 761139 CT rpoB H445Y | 131    | 16      | 10          | 105       |
| RIF SNP CN 761161 TC rpoB L452P | 123    | 5       | 75          | 43        |
| RIF SNP CN 761109 GT rpoB D435Y | 106    | 18      | 22          | 66        |
| RIF SNP CN 761139 CG rpoB H445D | 99     | 21      | 10          | 68        |
| RIF SNP CN 761140 AG rpoB H445R | 59     | 9       | 3           | 47        |
| RIF SNP CN 761155 CG rpoB S450W | 50     | 3       | 15          | 32        |
| RIF SNP CN 761140 AT rpoB H445L | 40     | 7       | 4           | 29        |
| RIF SNP CN 761095 TC rpoB L430P | 37     | 3       | 20          | 14        |
| RIF SNP CN 761140 AT rpoB I491F | 36     | 8       | 18          | 10        |
| RIF SNP CN 761277 AT rpoB I491F | 36     | 8       | 18          | 10        |
| RIF SNP CN 760314 GT rpoB V170F | 29     | 13      | 1           | 15        |
| RIF rpoB S450P u                | 9      | 0       | 0           | 9         |
| RIF rpoB Q432P u                | 7      | 0       | 0           | 7         |
| RIF rpoB S441L u                | 7      | 0       | 0           | 7         |
| RIF rpoB D435G u                | 6      | 0       | 0           | 6         |
| RIF rpoB Q432K u                | 6      | 0       | 0           | 6         |
| RIF rpoB R448Q u                | 6      | 0       | 0           | 6         |
| RIF rpoB E250G u                | 4      | 0       | 0           | 4         |
| RIF rpoB H445N u                | 4      | 0       | 0           | 4         |
| RIF rpoB V695L u                | 4      | 0       | 0           | 4         |
| RIF rpoB P454L u                | 3      | 0       | 0           | 3         |
| RIF rpoB Q432L u                | 3      | 0       | 0           | 3         |
| RIF rpoB D435N u                | 2      | 0       | 0           | 2         |
| RIF rpoB H445P u                | 2      | 0       | 0           | 2         |
| RIF rpoB L494P u                | 2      | 0       | 0           | 2         |
| RIF rpoB M434I u                | 2      | 0       | 0           | 2         |
| RIF rpoB Q432E u                | 2      | 0       | 0           | 2         |
| RIF rpoB A451G u                | 1      | 0       | 0           | 1         |
| RIF rpoB D435A u                | 1      | 0       | 0           | 1         |
| RIF rpoB G675D u                | 1      | 0       | 0           | 1         |
| RIF rpoB G981D u                | 1      | 0       | 0           | 1         |
| RIF rpoB H835Q u                | 1      | 0       | 0           | 1         |
| RIF rpoB H835R u                | 1      | 0       | 0           | 1         |
| RIF rpoB I925V u                | 1      | 0       | 0           | 1         |
| RIF rpoB K446Q u                | 1      | 0       | 0           | 1         |
| RIF rpoB L430R u                | 1      | 0       | 0           | 1         |
| RIF rpoB L443W u                | 1      | 0       | 0           | 1         |
| RIF rpoB M707T u                | 1      | 0       | 0           | 1         |
| RIF rpoB P280L u                | 1      | 0       | 0           | 1         |
| RIF rpoB P439S u                | 1      | 0       | 0           | 1         |
| RIF rpoB S428R u                | 1      | 0       | 0           | 1         |
| RIF rpoB S441T u                | 1      | 0       | 0           | 1         |
| RIF rpoB T400A u                | 1      | 0       | 0           | 1         |
| RIF rpoB T400P u                | 1      | 0       | 0           | 1         |
| RIF rpoB T444P u                | 1      | 0       | 0           | 1         |
| RIF rpoB V113I u                | 1      | 0       | 0           | 1         |
| RIF rpoB V469L u                | 1      | 0       | 0           | 1         |
| RIF SNP CN 761102 AC rpoB Q432H | 0      | 0       | 0           | 0         |
| RIF SNP CN 761155 CA rpoB S450. | 0      | 0       | 0           | 0         |

Streptomycin (STR) Data, Abbreviations: counts = how many isolates had this mutation, no\_data = how many isolates had this mutation but no data on whether they were phenotypically resistant or not to RIF, susceptible = how many isolates had this mutation but were phenotypically susceptible to STR, resistant = how many isolates had this mutation but were resistant to STR

| country                          | STR_SNP_CN_4407967_AG_gid_L79S | STR_SNP_CN_781687_AG_rpsL_K43R | STR_SNP_CN_781822_AG_rpsL_K88R | STR_SNP_N_1472359_A514C_rrs | STR_SNP_N_1472362_C517T_rrs | STR_othersnp | STR_unknown |
|----------------------------------|--------------------------------|--------------------------------|--------------------------------|-----------------------------|-----------------------------|--------------|-------------|
| Azerbaijan                       | 0                              | 0                              | 0                              | 0                           | 1                           | 0            | 0           |
| Bangladesh                       | 0                              | 0                              | 1                              | 0                           | 0                           | 0            | 1           |
| Belarus                          | 0                              | 63                             | 6                              | 20                          | 10                          | 1            | 0           |
| Brazil                           | 0                              | 1                              | 0                              | 0                           | 0                           | 0            | 1           |
| Burma                            | 0                              | 1                              | 0                              | 0                           | 0                           | 0            | 0           |
| Canada                           | 0                              | 0                              | 0                              | 0                           | 0                           | 0            | 0           |
| China                            | 0                              | 46                             | 16                             | 10                          | 2                           | 4            | 7           |
| Colombia                         | 0                              | 0                              | 0                              | 0                           | 0                           | 0            | 0           |
| Democratic Republic of the Congo | 0                              | 0                              | 0                              | 0                           | 0                           | 0            | 0           |
| Denmark                          | 0                              | 0                              | 0                              | 0                           | 0                           | 0            | 0           |
| Djibouti                         | 0                              | 0                              | 0                              | 0                           | 0                           | 0            | 0           |
| Dominican Republic               | 0                              | 0                              | 0                              | 0                           | 0                           | 0            | 0           |
| Estonia                          | 0                              | 2                              | 0                              | 0                           | 0                           | 0            | 0           |
| Georgia                          | 0                              | 5                              | 0                              | 0                           | 0                           | 0            | 0           |
| Germany                          | 3                              | 29                             | 3                              | 3                           | 2                           | 38           | 11          |
| Guinea                           | 0                              | 0                              | 0                              | 0                           | 1                           | 0            | 0           |
| India                            | 0                              | 9                              | 1                              | 0                           | 1                           | 2            | 2           |
| Indonesia                        | 0                              | 0                              | 0                              | 0                           | 0                           | 0            | 0           |
| Iran                             | 0                              | 8                              | 0                              | 1                           | 3                           | 0            | 1           |
| Kazakhstan                       | 0                              | 2                              | 0                              | 0                           | 0                           | 0            | 0           |
| Malawi                           | 0                              | 4                              | 6                              | 0                           | 0                           | 18           | 3           |
| Mali                             | 17                             | 0                              | 1                              | 1                           | 0                           | 1            | 1           |
| Moldova                          | 0                              | 13                             | 27                             | 0                           | 1                           | 2            | 0           |
| Morocco                          | 0                              | 0                              | 0                              | 0                           | 0                           | 0            | 1           |
| Nepal                            | 0                              | 2                              | 0                              | 1                           | 0                           | 0            | 0           |
| Netherlands                      | 0                              | 9                              | 1                              | 1                           | 7                           | 0            | 0           |
| Nigeria                          | 0                              | 0                              | 0                              | 0                           | 0                           | 0            | 1           |
| Not Provided                     | 15                             | 239                            | 29                             | 39                          | 20                          | 244          | 50          |
| Pakistan                         | 0                              | 0                              | 0                              | 0                           | 1                           | 0            | 0           |
| Peru                             | 2                              | 71                             | 8                              | 14                          | 7                           | 340          | 96          |
| Philippines                      | 0                              | 0                              | 0                              | 0                           | 0                           | 0            | 1           |
| Portugal                         | 0                              | 1                              | 0                              | 0                           | 0                           | 0            | 0           |
| Romania                          | 0                              | 9                              | 2                              | 2                           | 0                           | 6            | 5           |
| Russia                           | 0                              | 221                            | 43                             | 17                          | 184                         | 19           | 47          |
| Rwanda                           | 0                              | 0                              | 0                              | 0                           | 0                           | 0            | 1           |
| Sierra Leone                     | 0                              | 9                              | 7                              | 0                           | 0                           | 13           | 4           |
| South Africa                     | 74                             | 72                             | 15                             | 83                          | 7                           | 9            | 15          |
| South Korea                      | 0                              | 12                             | 1                              | 2                           | 0                           | 3            | 3           |
| Spain                            | 0                              | 0                              | 0                              | 0                           | 0                           | 0            | 1           |
| Swaziland                        | 0                              | 0                              | 1                              | 0                           | 0                           | 0            | 0           |
| Thailand                         | 0                              | 0                              | 0                              | 0                           | 0                           | 0            | 0           |
| Turkmenistan                     | 0                              | 5                              | 1                              | 0                           | 0                           | 0            | 0           |
| Uganda                           | 0                              | 2                              | 3                              | 0                           | 2                           | 13           | 9           |
| United Kingdom                   | 5                              | 53                             | 10                             | 16                          | 5                           | 55           | 5           |
| Uzbekistan                       | 0                              | 212                            | 12                             | 13                          | 3                           | 13           | 5           |
| Vietnam                          | 0                              | 2                              | 0                              | 0                           | 0                           | 0            | 0           |

| resistance mutation             | counts | no_data | susceptible | resistant |
|---------------------------------|--------|---------|-------------|-----------|
| STR SNP CN 781687 AG rpsL K43R  | 1102   | 172     | 112         | 818       |
| STR unknown                     | 271    | 0       | 0           | 271       |
| STR SNP N 1472362 C517T rrs     | 257    | 14      | 54          | 189       |
| STR SNP N 1472359 A514C rrs     | 223    | 54      | 25          | 144       |
| STR SNP CN 781822 AG rpsL K88R  | 194    | 22      | 44          | 128       |
| STR SNP CN 4407967 AG gid L79S  | 116    | 27      | 13          | 76        |
| STR SNP CN 4407967 AC gid L79W  | 73     | 15      | 26          | 32        |
| STR SNP CN 781822 AC rpsL K88T  | 55     | 8       | 6           | 41        |
| STR SNP CN 4407934 AC gid L90R  | 35     | 6       | 10          | 19        |
| STR SNP CN 4407768 CA gid L145F | 34     | 3       | 22          | 9         |
| STR SNP N 1472358 C513T rrs     | 34     | 6       | 2           | 26        |
| STR SNP N 1472751 A906G rrs     | 29     | 3       | 8           | 18        |
| STR DEL F 4407640 d562A gid     | 28     | 0       | 17          | 11        |
| STR SNP CN 4408094 CT gid G37R  | 28     | 0       | 17          | 11        |
| STR DEL F 4407852 d350C gid     | 27     | 19      | 5           | 3         |
| STR SNP CN 4407995 TG gid S70R  | 27     | 19      | 5           | 3         |
| STR SNP CN 4407985 CG gid G73A  | 23     | 0       | 8           | 15        |
| STR SNP CN 4407809 CA gid D132Y | 21     | 5       | 1           | 15        |
| STR SNP CN 4407916 CA gid R96L  | 16     | 3       | 5           | 8         |
| STR gid L50R u                  | 14     | 0       | 0           | 14        |
| STR SNP N 1472753 A908C rrs     | 11     | 0       | 3           | 8         |
| STR SNP CN 4407748 AG gid L152S | 10     | 1       | 5           | 4         |
| STR gid P84L u                  | 10     | 0       | 0           | 10        |
| STR SNP CN 4408064 GA gid R47W  | 9      | 2       | 5           | 2         |
| STR rrs A514T u                 | 8      | 0       | 0           | 8         |
| STR SNP CN 4407832 AG gid V124A | 7      | 0       | 2           | 5         |
| STR SNP CN 781822 AT rpsL K88M  | 7      | 1       | 2           | 4         |
| STR gid G76C u                  | 7      | 0       | 0           | 7         |
| STR gid A138V u                 | 6      | 0       | 0           | 6         |
| STR gid D67G u                  | 6      | 0       | 0           | 6         |
| STR gid L26F u                  | 6      | 0       | 0           | 6         |
| STR SNP CN 4408148 CG gid A19P  | 5      | 0       | 2           | 3         |
| STR gid H48Y u                  | 5      | 0       | 0           | 5         |
| STR gid P75R u                  | 5      | 0       | 0           | 5         |
| STR gid R137P u                 | 5      | 0       | 0           | 5         |
| STR gid V77G u                  | 5      | 0       | 0           | 5         |
| STR SNP CN 4408102 CT gid G34E  | 4      | 2       | 0           | 2         |
| STR gid A10P u                  | 4      | 0       | 0           | 4         |
| STR gid S149R u                 | 4      | 0       | 0           | 4         |
| STR SNP CN 4407947 GA gid L86F  | 3      | 0       | 3           | 0         |
| STR SNP CN 4408060 TG gid H48P  | 3      | 1       | 1           | 1         |
| STR gid A134E u                 | 3      | 0       | 0           | 3         |
| STR gid A138E u                 | 3      | 0       | 0           | 3         |
| STR gid A80P u                  | 3      | 0       | 0           | 3         |
| STR gid D85A u                  | 3      | 0       | 0           | 3         |
| STR gid E92Q u                  | 3      | 0       | 0           | 3         |
| STR gid G69D u                  | 3      | 0       | 0           | 3         |
| STR gid L86P u                  | 3      | 0       | 0           | 3         |
| STR gid P75S u                  | 3      | 0       | 0           | 3         |
| STR gid R118S u                 | 3      | 0       | 0           | 3         |
| STR gid T146K u                 | 3      | 0       | 0           | 3         |
| STR gid V77A u                  | 3      | 0       | 0           | 3         |
| STR rrs C905A u                 | 3      | 0       | 0           | 3         |
| STR SNP N 1473167 T1322G rrs    | 2      | 0       | 0           | 2         |
| STR gid A200E u                 | 2      | 0       | 0           | 2         |
| STR gid E170G u                 | 2      | 0       | 0           | 2         |
| STR gid E40A u                  | 2      | 0       | 0           | 2         |
| STR gid G117E u                 | 2      | 0       | 0           | 2         |
| STR gid G117V u                 | 2      | 0       | 0           | 2         |
| STR gid G30R u                  | 2      | 0       | 0           | 2         |
| STR gid G34A u                  | 2      | 0       | 0           | 2         |
| STR gid G34V u                  | 2      | 0       | 0           | 2         |
| STR gid G37E u                  | 2      | 0       | 0           | 2         |
| STR gid H48N u                  | 2      | 0       | 0           | 2         |
| STR gid L101F u                 | 2      | 0       | 0           | 2         |
| STR gid L108R u                 | 2      | 0       | 0           | 2         |
| STR gid L18H u                  | 2      | 0       | 0           | 2         |
| STR gid L59R u                  | 2      | 0       | 0           | 2         |
| STR gid P75L u                  | 2      | 0       | 0           | 2         |
| STR gid R137W u                 | 2      | 0       | 0           | 2         |
| STR gid R83G u                  | 2      | 0       | 0           | 2         |
| STR gid R83W u                  | 2      | 0       | 0           | 2         |
| STR gid V110A u                 | 2      | 0       | 0           | 2         |
| STR gid V65G u                  | 2      | 0       | 0           | 2         |
| STR gid W45S u                  | 2      | 0       | 0           | 2         |
| STR rpsL K88Q u                 | 2      | 0       | 0           | 2         |
| STR SNP CN 4408138 TC gid Y22C  | 1      | 0       | 0           | 1         |
| STR gid A10V u                  | 1      | 0       | 0           | 1         |
| STR gid A119D u                 | 1      | 0       | 0           | 1         |
| STR gid A133P u                 | 1      | 0       | 0           | 1         |
| STR gid A138P u                 | 1      | 0       | 0           | 1         |
| STR gid A140S u                 | 1      | 0       | 0           | 1         |
| STR gid A19G u                  | 1      | 0       | 0           | 1         |
| STR gid A205E u                 | 1      | 0       | 0           | 1         |
| STR gid A205T u                 | 1      | 0       | 0           | 1         |
| STR gid A27P u                  | 1      | 0       | 0           | 1         |
| STR gid A72V u                  | 1      | 0       | 0           | 1         |
| STR gid A82E u                  | 1      | 0       | 0           | 1         |
| STR gid C52F u                  | 1      | 0       | 0           | 1         |
| STR gid D67A u                  | 1      | 0       | 0           | 1         |
| STR gid E120K u                 | 1      | 0       | 0           | 1         |
| STR gid E121D u                 | 1      | 0       | 0           | 1         |
| STR gid G117R u                 | 1      | 0       | 0           | 1         |
| STR gid G117W u                 | 1      | 0       | 0           | 1         |
| STR gid G130A u                 | 1      | 0       | 0           | 1         |
| STR gid G182R u                 | 1      | 0       | 0           | 1         |
| STR gid G30D u                  | 1      | 0       | 0           | 1         |
| STR gid G30V u                  | 1      | 0       | 0           | 1         |
| STR gid G34R u                  | 1      | 0       | 0           | 1         |

|                                |   |   |   |   |
|--------------------------------|---|---|---|---|
| STR_gid G34W u                 | 1 | 0 | 0 | 1 |
| STR_gid G71R u                 | 1 | 0 | 0 | 1 |
| STR_gid H48D u                 | 1 | 0 | 0 | 1 |
| STR_gid H48O u                 | 1 | 0 | 0 | 1 |
| STR_gid H48R u                 | 1 | 0 | 0 | 1 |
| STR_gid I11N u                 | 1 | 0 | 0 | 1 |
| STR_gid I162S u                | 1 | 0 | 0 | 1 |
| STR_gid I81R u                 | 1 | 0 | 0 | 1 |
| STR_gid I81T u                 | 1 | 0 | 0 | 1 |
| STR_gid L108P u                | 1 | 0 | 0 | 1 |
| STR_gid L142W u                | 1 | 0 | 0 | 1 |
| STR_gid L160P u                | 1 | 0 | 0 | 1 |
| STR_gid L79F u                 | 1 | 0 | 0 | 1 |
| STR_gid L86R u                 | 1 | 0 | 0 | 1 |
| STR_gid L91P u                 | 1 | 0 | 0 | 1 |
| STR_gid M150R u                | 1 | 0 | 0 | 1 |
| STR_gid P78L u                 | 1 | 0 | 0 | 1 |
| STR_gid P93L u                 | 1 | 0 | 0 | 1 |
| STR_gid P93Q u                 | 1 | 0 | 0 | 1 |
| STR_gid P93R u                 | 1 | 0 | 0 | 1 |
| STR_gid R116W u                | 1 | 0 | 0 | 1 |
| STR_gid R118C u                | 1 | 0 | 0 | 1 |
| STR_gid R118L u                | 1 | 0 | 0 | 1 |
| STR_gid R137L u                | 1 | 0 | 0 | 1 |
| STR_gid R175P u                | 1 | 0 | 0 | 1 |
| STR_gid R20P u                 | 1 | 0 | 0 | 1 |
| STR_gid R21W u                 | 1 | 0 | 0 | 1 |
| STR_gid R33P u                 | 1 | 0 | 0 | 1 |
| STR_gid R47G u                 | 1 | 0 | 0 | 1 |
| STR_gid R47P u                 | 1 | 0 | 0 | 1 |
| STR_gid R64W u                 | 1 | 0 | 0 | 1 |
| STR_gid R83P u                 | 1 | 0 | 0 | 1 |
| STR_gid R96C u                 | 1 | 0 | 0 | 1 |
| STR_gid S131T u                | 1 | 0 | 0 | 1 |
| STR_gid S70N u                 | 1 | 0 | 0 | 1 |
| STR_gid T98I u                 | 1 | 0 | 0 | 1 |
| STR_gid V105E u                | 1 | 0 | 0 | 1 |
| STR_gid V115G u                | 1 | 0 | 0 | 1 |
| STR_gid V203L u                | 1 | 0 | 0 | 1 |
| STR_gid V41I u                 | 1 | 0 | 0 | 1 |
| STR_gid V66A u                 | 1 | 0 | 0 | 1 |
| STR_gid V88A u                 | 1 | 0 | 0 | 1 |
| STR_gid V89G u                 | 1 | 0 | 0 | 1 |
| STR_gid Y195C u                | 1 | 0 | 0 | 1 |
| STR_gid Y22S u                 | 1 | 0 | 0 | 1 |
| STR_rpsL E70A u                | 1 | 0 | 0 | 1 |
| STR_rpsL E76A u                | 1 | 0 | 0 | 1 |
| STR_rms A1012G u               | 1 | 0 | 0 | 1 |
| STR_rms A1223G u               | 1 | 0 | 0 | 1 |
| STR_rms A1325C u               | 1 | 0 | 0 | 1 |
| STR_rms A170G u                | 1 | 0 | 0 | 1 |
| STR_rms A504C u                | 1 | 0 | 0 | 1 |
| STR_rms A700T u                | 1 | 0 | 0 | 1 |
| STR_rms A703G u                | 1 | 0 | 0 | 1 |
| STR_rms A753T u                | 1 | 0 | 0 | 1 |
| STR_rms A907C u                | 1 | 0 | 0 | 1 |
| STR_rms A907T u                | 1 | 0 | 0 | 1 |
| STR_rms A908G u                | 1 | 0 | 0 | 1 |
| STR_rms A948T u                | 1 | 0 | 0 | 1 |
| STR_rms C1067T u               | 1 | 0 | 0 | 1 |
| STR_rms C1199G u               | 1 | 0 | 0 | 1 |
| STR_rms C1390T u               | 1 | 0 | 0 | 1 |
| STR_rms C1402T u               | 1 | 0 | 0 | 1 |
| STR_rms C239A u                | 1 | 0 | 0 | 1 |
| STR_rms C244T u                | 1 | 0 | 0 | 1 |
| STR_rms C270T u                | 1 | 0 | 0 | 1 |
| STR_rms C332T u                | 1 | 0 | 0 | 1 |
| STR_rms C397T u                | 1 | 0 | 0 | 1 |
| STR_rms C414A u                | 1 | 0 | 0 | 1 |
| STR_rms C499T u                | 1 | 0 | 0 | 1 |
| STR_rms C546T u                | 1 | 0 | 0 | 1 |
| STR_rms C692T u                | 1 | 0 | 0 | 1 |
| STR_rms C708T u                | 1 | 0 | 0 | 1 |
| STR_rms C897T u                | 1 | 0 | 0 | 1 |
| STR_rms C905G u                | 1 | 0 | 0 | 1 |
| STR_rms C936T u                | 1 | 0 | 0 | 1 |
| STR_rms G1042C u               | 1 | 0 | 0 | 1 |
| STR_rms G1072A u               | 1 | 0 | 0 | 1 |
| STR_rms G1415T u               | 1 | 0 | 0 | 1 |
| STR_rms G319A u                | 1 | 0 | 0 | 1 |
| STR_rms G395C u                | 1 | 0 | 0 | 1 |
| STR_rms G407A u                | 1 | 0 | 0 | 1 |
| STR_rms G408T u                | 1 | 0 | 0 | 1 |
| STR_rms G537A u                | 1 | 0 | 0 | 1 |
| STR_rms G544A u                | 1 | 0 | 0 | 1 |
| STR_rms G685A u                | 1 | 0 | 0 | 1 |
| STR_rms G749C u                | 1 | 0 | 0 | 1 |
| STR_rms G771A u                | 1 | 0 | 0 | 1 |
| STR_rms G878A u                | 1 | 0 | 0 | 1 |
| STR_rms G887T u                | 1 | 0 | 0 | 1 |
| STR_rms G909T u                | 1 | 0 | 0 | 1 |
| STR_rms T1206C u               | 1 | 0 | 0 | 1 |
| STR_rms T1208A u               | 1 | 0 | 0 | 1 |
| STR_rms T1217A u               | 1 | 0 | 0 | 1 |
| STR_rms T16C u                 | 1 | 0 | 0 | 1 |
| STR_rms T327C u                | 1 | 0 | 0 | 1 |
| STR_rms T411A u                | 1 | 0 | 0 | 1 |
| STR_rms T529G u                | 1 | 0 | 0 | 1 |
| STR_rms T545A u                | 1 | 0 | 0 | 1 |
| STR_rms T580C u                | 1 | 0 | 0 | 1 |
| STR_rms T672A u                | 1 | 0 | 0 | 1 |
| STR_rms T696G u                | 1 | 0 | 0 | 1 |
| STR_DEL F 4408023 d179T_gid    | 0 | 0 | 0 | 0 |
| STR_DEL F 4408116 d86G_gid     | 0 | 0 | 0 | 0 |
| STR_SNP_CN 4408091_Gf_gid P38T | 0 | 0 | 0 | 0 |
| STR_SNP_I 1473637_A.2I_rms.rl  | 0 | 0 | 0 | 0 |
| STR_SNP_N 1473109_T1264G_rms   | 0 | 0 | 0 | 0 |
| STR_SNP_N 1473343_G1498T_rms   | 0 | 0 | 0 | 0 |

**Supplementary Table 17: Median MRSCA with IQR for INH, STR, RIF, EMB, PZA, SLIs, ETH, FLQ, and CYS for 0.5 and 0.3 mutation rate.**

| Drug | Median MRSCA 0.5 Mutation Rate | Median MRSCA 0.3 Mutation Rate |
|------|--------------------------------|--------------------------------|
| INH  | 13.9 IQR 11.0 – 17.5           | 23.3 IQR 17.4 – 29.3           |
| STR  | 7.9 IQR 4.1 – 12.9             | 13.0 IQR 6.4 – 20.7            |
| RIF  | 6.6 IQR 2.9 – 14.4             | 10.4 IQR 4.8 – 24.0            |
| EMB  | 5.9 IQR 2.5 – 13.5             | 8.1 IQR 3.7 – 19.3             |
| PZA  | 3.2 IQR 1.9 – 7.8              | 5.4 IQR 3.2 – 11.7             |
| SLIs | 5.0 IQR 2.0 – 9.1              | 7.9 IQR 3.4 – 15.5             |
| ETH  | 2.3 IQR 1.3 – 12.8             | 4.1 IQR 2.0 – 21.5             |
| FLQ  | 4.4 IQR 1.8 – 10.4             | 6.5 IQR 2.7 – 16.9             |
| CYS  | 1.6 IQR 1.2-2.0                | 2.7 IQR 2.1-3.5                |



**Supplementary Table 18: P-value for Wilcoxon Rank-Sum Test between the MRSCA distributions of INH, RIF, STR, PZA, SLIs, ETH, EMB, FLQ, and CYS for 0.5 and 0.3 mutation rate.**

P-value  $\leq$  0.01, highlighted in red

| 0.5 MR | INH | RIF    | STR    | PZA    | SLIs   | ETH    | EMB   | FLQ    | CYS   |
|--------|-----|--------|--------|--------|--------|--------|-------|--------|-------|
| INH    |     | 3 E-20 | 1 E-20 | 2 E-38 | 2 E-34 | 6 E-13 | 2E-19 | 4E-30  | 3E-8  |
| RIF    |     |        | 0.06   | 9E-15  | 4 E-7  | 1 E-5  | 0.10  | 2 E-8  | 2E-5  |
| STR    |     |        |        | 1E-21  | 1E-9   | 2 E-6  | 5 E-5 | 1 E-11 | 2 E-3 |
| PZA    |     |        |        |        | 1 E-3  | 0.2    | 1E-4  | 0.31   | 4E-3  |
| SLIs   |     |        |        |        |        | 0.03   | 0.01  | 0.25   | 1E-3  |
| ETH    |     |        |        |        |        |        | 9 E-3 | 0.15   | 0.11  |
| EMB    |     |        |        |        |        |        |       | 8E-4   | 1E-4  |
| FLQ    |     |        |        |        |        |        |       |        | 0.01  |
| CYS    |     |        |        |        |        |        |       |        |       |

P-value  $\leq$  0.01, highlighted in red

| 0.3 MR | INH | RIF    | STR   | PZA    | SLIs   | ETH  | EMB   | FLQ    | CYS   |
|--------|-----|--------|-------|--------|--------|------|-------|--------|-------|
| INH    |     | 7 E-14 | 1 E-9 | 9 E-31 | 5 E-25 | 0.22 | 2E-9  | 2E-12  | 6 E-6 |
| RIF    |     |        | 0.08  | 1E-13  | 4 E-7  | 3E-5 | 0.15  | 9E-8   | 7 E-3 |
| STR    |     |        |       | 1E-21  | 1E-11  | 2E-6 | 4 E-3 | 1 E-11 | 5 E-6 |
| PZA    |     |        |       |        | 4E-3   | 0.20 | 2E-6  | 0.32   | 4E-3  |
| SLIs   |     |        |       |        |        | 0.06 | 8E-3  | 0.55   | 2E-3  |
| ETH    |     |        |       |        |        |      | 2E-3  | 0.16   | 0.13  |
| EMB    |     |        |       |        |        |      |       | 8E-4   | 2E-4  |
| FLQ    |     |        |       |        |        |      |       |        | 6E-3  |
| CYS    |     |        |       |        |        |      |       |        |       |

**Supplementary Table 19: Median and IQR for MRSCA distribution for RIF and SLIs in China and Peru for 0.5 and 0.3 Mutation Rate.**

| Country | Drug | Median MRSCA 0.5 Mutation Rate | Median MRSCA 0.3 Mutation Rate |
|---------|------|--------------------------------|--------------------------------|
| China   | RIF  | 16.1 (IQR 12.7 – 19.3)         | 27.7 (IQR 21.1 – 30.7)         |
| Peru    | RIF  | 4.6 (IQR 2.1 – 13.7)           | 8.3 (IQR 3.5 – 21.8)           |
| China   | SLIs | 9.9 (IQR 8.4 – 14.4)           | 17.0 (IQR 13.5 – 24.6)         |
| Peru    | SLIs | 3.4 (IQR 1.7 – 8.8)            | 5.4 (IQR 2.6 – 14.4)           |

**Supplementary Table 20: GDP per capita and Median MRSCA Date for RIF for 12 countries for 0.3 and 0.5 Mutation Rate.**

| <b>Countries</b>      | <b>GDP per capita</b> | <b>0.5 Mutation Rate</b> | <b>0.3 Mutation Rate</b> |
|-----------------------|-----------------------|--------------------------|--------------------------|
| <b>China</b>          | 10150                 | 16.1 (IQR 12.7 – 19.3)   | 27.7 (IQR 21.1 – 30.7)   |
| <b>Peru</b>           | 7140                  | 4.6 (IQR 2.1 – 13.7)     | 8.3 (IQR 3.5 – 21.8)     |
| <b>Russia</b>         | 11190                 | 5.7 (IQR 3.9 – 10.2)     | 8.8 (IQR 5.4 – 15.8)     |
| <b>Mali</b>           | 933.88                | 3.4 (IQR 3.2 – 3.4)      | 5.2 (IQR 4.4 – 5.2)      |
| <b>Moldova</b>        | 3400                  | 3.8 (IQR 3.1 – 4.2)      | 6.3 (IQR 4.8 – 7.1)      |
| <b>Malawi</b>         | 366.53                | 5.4 (IQR 5.4 – 5.4)      | 7.9 (IQR 7.9 – 7.9)      |
| <b>Germany</b>        | 47790                 | 16 (IQR 10.0 – 17.4)     | 28 (IQR 24.5 – 28.5)     |
| <b>India</b>          | 2200                  | 11 (IQR 11.2 – 13.8)     | 21 (IQR 18.7 – 23.6)     |
| <b>Russia</b>         | 11190                 | 5.7 (IQR 3.9 – 10.2)     | 8.8 (IQR 5.4 – 15.8)     |
| <b>South Africa</b>   | 6330                  | 4.53 (IQR 2.4 – 6.1)     | 7.1 (IQR 4.0 – 10.7)     |
| <b>United Kingdom</b> | 42310                 | 11.9 (IQR 11.4 – 14.4)   | 19.5 (IQR 18.2 – 24.0)   |
| <b>South Korea</b>    | 31940                 | 17.7 (IQR 15.8 – 17.7)   | 28.5 (IQR 24.5 – 28.5)   |
| <b>Sierra Leone</b>   | 516.76                | 5.2 (IQR 3.6 – 11.3)     | 8.4 (IQR 6.0 – 19.1)     |

**Supplementary Figure 1: Distribution of STR MRSCA dates across all countries and lineages.**

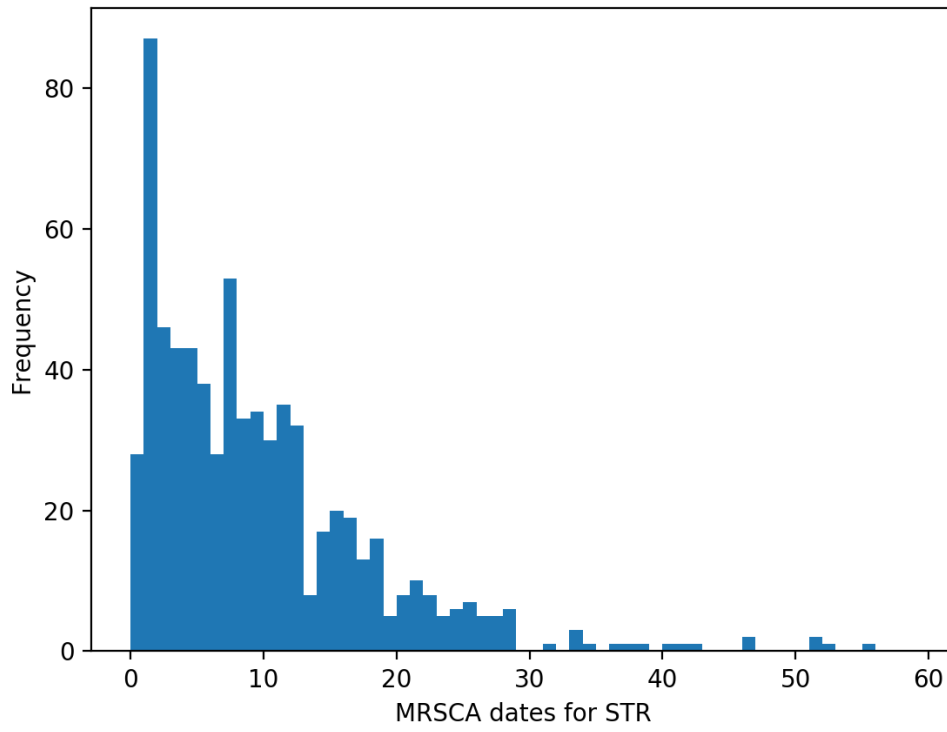

**Supplementary Figure 2 Distribution of resistance mutations for six drugs (n=9385).** Pie chart size is proportional isolate number from each country. Mutations listed in order of frequency.

INH Global Resistance Mutation Distribution

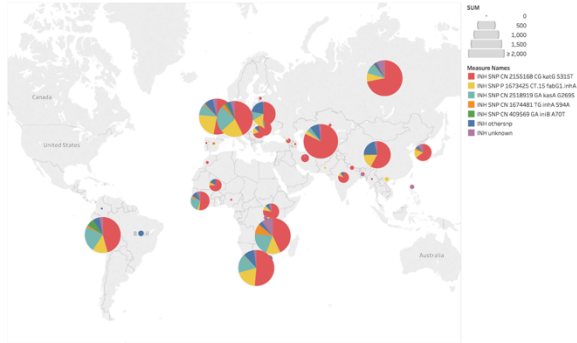

RIF Global Resistance Mutation Distribution

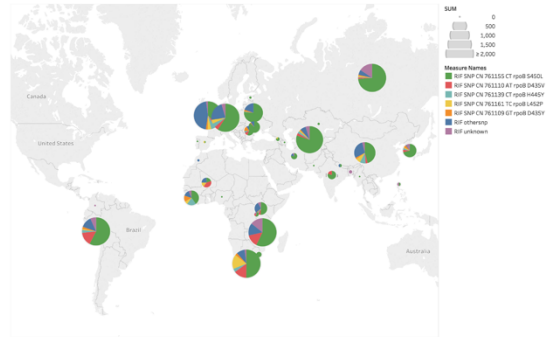

EMB Global Resistance Mutation Distribution

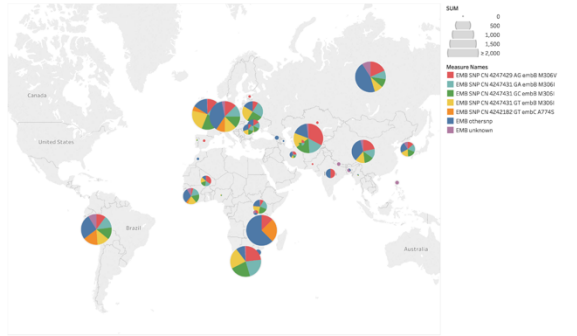

PZA Global Resistance Mutation Distribution

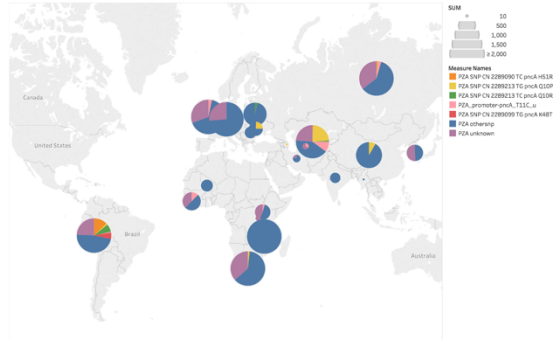

LEVO Global Resistance Mutation Distribution

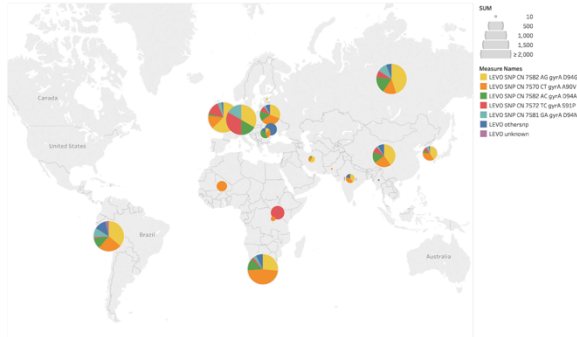

KAN Global Resistance Mutation Distribution

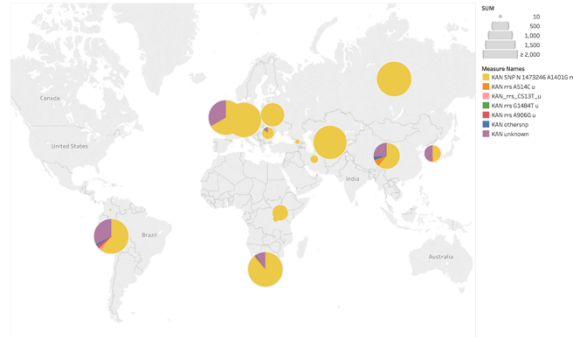

**Supplementary Figure 3: MRSCA date distribution for PZA, EMB, FLQ, and SLIs for Peru, South Africa, and China for 0.3 and 0.5 mutation rate.**

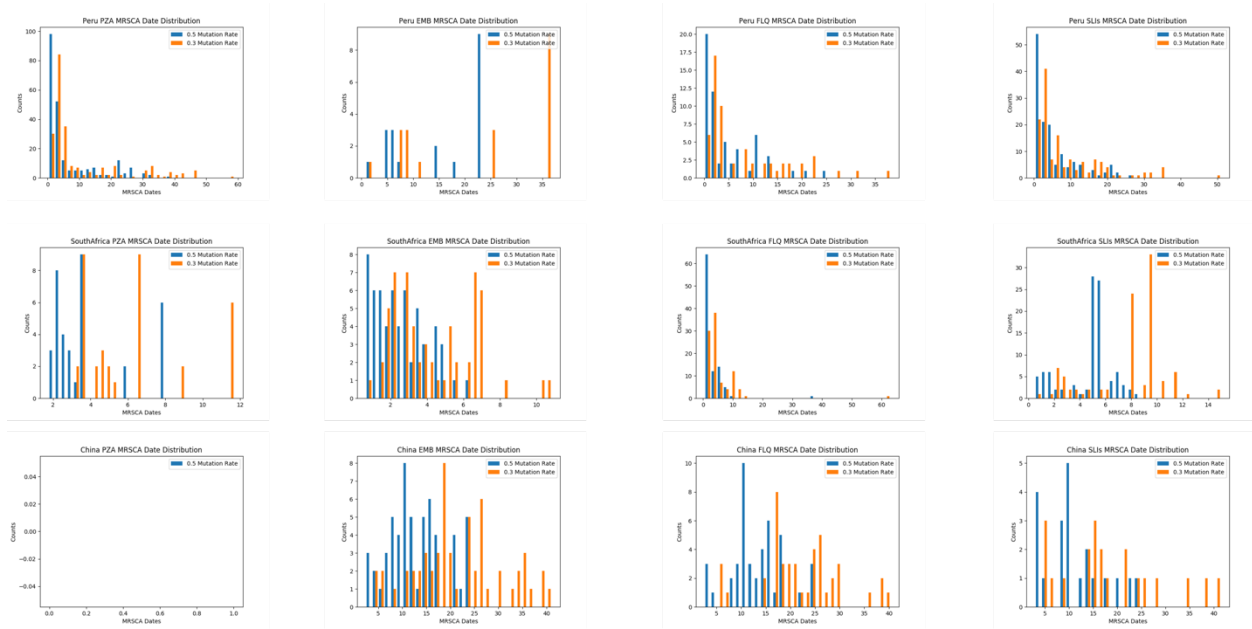

**Supplementary Figure 4: Median RIF MRSCA date vs Gross Domestic Product (GDP) per capita for 12 countries for 0.3 and 0.5 Mutation Rate.** Data plotted is provided in Supplementary Table 20.

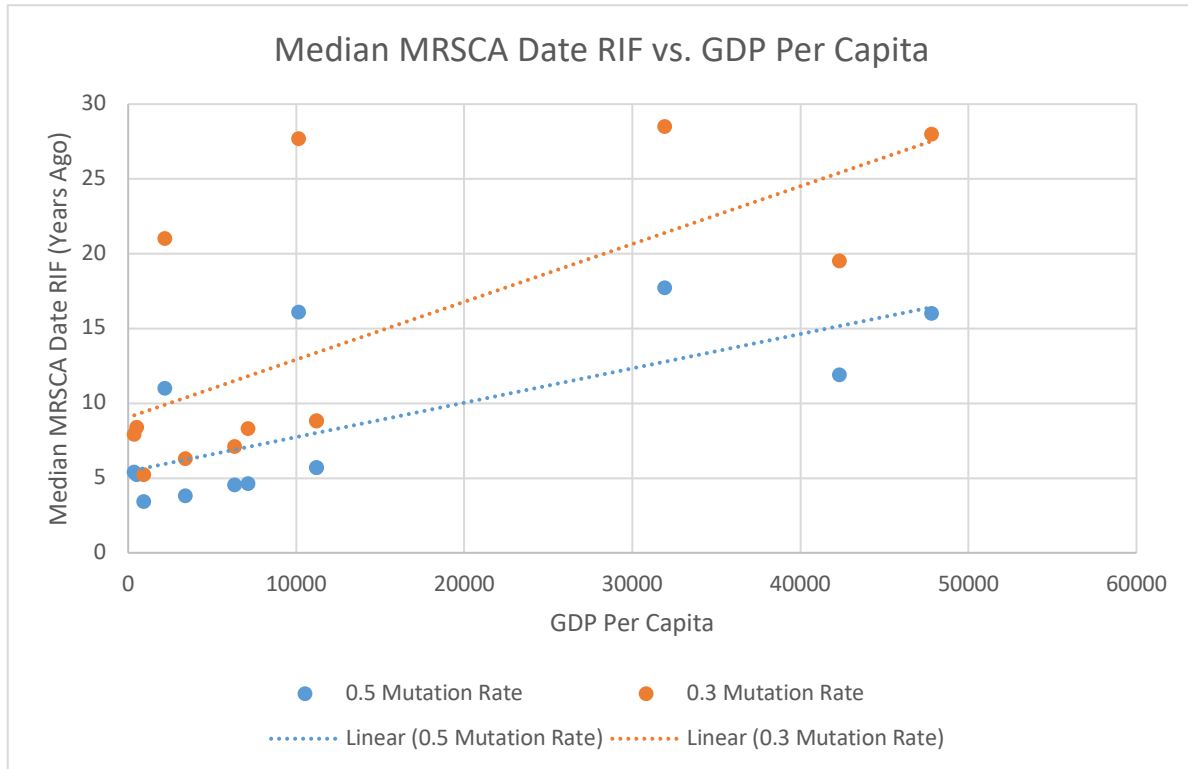

## Supplementary References:

1. Ezewudo M, Borens A, Chiner-Oms Á, Miotto P, Chindelevitch L, Starks AM, et al. Integrating standardized whole genome sequence analysis with a global *Mycobacterium tuberculosis* antibiotic resistance knowledgebase. *Scientific Reports*. 2018 Oct 18;8(1):15382.
2. Schmieder R, Edwards R. Quality control and preprocessing of metagenomic datasets. *Bioinformatics*. 2011 Mar 15;27(6):863–4.
3. Wood DE, Salzberg SL. Kraken: ultrafast metagenomic sequence classification using exact alignments. *Genome Biology*. 2014 Mar 3;15(3):R46.
4. Li H. Aligning sequence reads, clone sequences and assembly contigs with BWA-MEM. arXiv:13033997 [q-bio] [Internet]. 2013 Mar 16 [cited 2019 Apr 11]; Available from: <http://arxiv.org/abs/1303.3997>
5. Picard toolkit [Internet]. Broad Institute, GitHub repository: Broad Institute; 2019. Available from: <http://broadinstitute.github.io/picard/>
6. Walker BJ, Abeel T, Shea T, Priest M, Abouelliel A, Sakthikumar S, et al. Pilon: An Integrated Tool for Comprehensive Microbial Variant Detection and Genome Assembly Improvement. *PLOS ONE*. 2014 Nov 19;9(11):e112963.
7. Coll F, McNerney R, Guerra-Assunção JA, Glynn JR, Perdigão J, Viveiros M, et al. A robust SNP barcode for typing *Mycobacterium tuberculosis* complex strains. *Nature Communications*. 2014 Sep 1;5:4812.
8. Seabold S, Perktold J. *Statsmodels: Econometric and Statistical Modeling with Python*. 2010;5.
9. WHO | Tuberculosis country profiles [Internet]. WHO. [cited 2019 May 9]. Available from: <http://www.who.int/tb/country/data/profiles/en/>
10. Stamatakis A. RAxML version 8: a tool for phylogenetic analysis and post-analysis of large phylogenies. *Bioinformatics*. 2014 May 1;30(9):1312–3.
11. Yang Z. Maximum likelihood phylogenetic estimation from DNA sequences with variable rates over sites: Approximate methods. *J Mol Evol*. 1994 Sep 1;39(3):306–14.
12. Suchard MA, Lemey P, Baele G, Ayres DL, Drummond AJ, Rambaut A. Bayesian phylogenetic and phylodynamic data integration using BEAST 1.10. *Virus Evol* [Internet]. 2018 Jan 1 [cited 2019 Apr 11];4(1). Available from: <https://academic.oup.com/ve/article/4/1/vey016/5035211>
13. Dixit A, Freschi L, Vargas R, Calderon R, Sacchettini J, Drobniowski F, et al. Whole genome sequencing identifies bacterial factors affecting transmission of multidrug-resistant tuberculosis in a high-prevalence setting. *Scientific Reports*. 2019 Apr 3;9(1):5602.
14. Sukumaran J, Holder MT. DendroPy: a Python library for phylogenetic computing. *Bioinformatics*. 2010 Jun 15;26(12):1569–71.



15. Oliphant T. NumPy: A guide to NumPy [Internet]. USA: Trelgol Publishing; 2006. Available from: <http://www.numpy.org/>
16. Jones E, Oliphant T, Peterson P. SciPy: Open Source Scientific Tools for Python. 2001 Jan 1;
17. Farhat MR, Sultana R, Iartchouk O, Bozeman S, Galagan J, Sisk P, et al. Genetic Determinants of Drug Resistance in Mycobacterium tuberculosis and Their Diagnostic Value. *Am J Respir Crit Care Med*. 2016 Feb 24;194(5):621–30.
18. Walker TM, Kohl TA, Omar SV, Hedge J, Del Ojo Elias C, Bradley P, et al. Whole-genome sequencing for prediction of Mycobacterium tuberculosis drug susceptibility and resistance: a retrospective cohort study. *Lancet Infect Dis*. 2015 Oct;15(10):1193–202.
19. Antibiotic resistance prediction for... | Wellcome Open Research [Internet]. [cited 2020 Aug 26]. Available from: <https://wellcomeopenresearch.org/articles/4-191>
20. World Economic Outlook, April 2019: Growth Slowdown, Precarious Recovery [Internet]. IMF. [cited 2019 Apr 11]. Available from: <https://www.imf.org/en/Publications/WEO/Issues/2019/03/28/world-economic-outlook-april-2019>
21. Kaufmann J, Schering AG. Analysis of Variance ANOVA. In: Wiley StatsRef: Statistics Reference Online [Internet]. American Cancer Society; 2014 [cited 2019 May 8]. Available from: <https://onlinelibrary.wiley.com/doi/abs/10.1002/9781118445112.stat06938>
22. Casali N, Nikolayevskyy V, Balabanova Y, Harris SR, Ignatyeva O, Kontsevaya I, et al. Evolution and transmission of drug-resistant tuberculosis in a Russian population. *Nat Genet*. 2014 Mar;46(3):279–86.
23. Rahman A, Sahrin M, Afrin S, Earley K, Ahmed S, Rahman SMM, et al. Comparison of Xpert MTB/RIF Assay and GenoType MTBDRplus DNA Probes for Detection of Mutations Associated with Rifampicin Resistance in Mycobacterium tuberculosis. *PLOS ONE*. 2016 Apr 7;11(4):e0152694.
24. policy\_statement.pdf [Internet]. [cited 2019 May 25]. Available from: [https://www.who.int/tb/features\\_archive/policy\\_statement.pdf](https://www.who.int/tb/features_archive/policy_statement.pdf)
25. Chen H-Y, Yu M-C, Huang W-L, Wu M-H, Chang Y-L, Che C-R, et al. Molecular Detection of Rifabutin-Susceptible Mycobacterium tuberculosis. *Journal of Clinical Microbiology*. 2012 Jun 1;50(6):2085–8.
26. Tagliani E, Cabibbe AM, Miotto P, Borroni E, Toro JC, Mansjö M, et al. Diagnostic Performance of the New Version (v2.0) of GenoType MTBDRsl Assay for Detection of Resistance to Fluoroquinolones and Second-Line Injectable Drugs: a Multicenter Study. *Journal of Clinical Microbiology*. 2015 Sep 1;53(9):2961–9.
27. Xie YL, Chakravorty S, Armstrong DT, Hall SL, Via LE, Song T, et al. Evaluation of a Rapid Molecular Drug-Susceptibility Test for Tuberculosis. *New England Journal of Medicine*. 2017 Sep 14;377(11):1043–54.
28. Murray JF, Schraufnagel DE, Hopewell PC. Treatment of Tuberculosis. A Historical Perspective. *Annals ATS*. 2015 Dec 1;12(12):1749–59.

29. Zhang Y, Shi W, Zhang W, Mitchison D. Mechanisms of Pyrazinamide Action and Resistance. *Microbiology Spectrum* [Internet]. 2014 Jul 18 [cited 2019 Jun 29];2(4). Available from: <http://www.asmscience.org/content/journal/microbiolspec/10.1128/microbiolspec.MGM2-0023-2013>
30. Alapi EM, Fischer J. Table of Selected Analogue Classes. In: *Analogue-based Drug Discovery* [Internet]. John Wiley & Sons, Ltd; 2006 [cited 2019 Jun 29]. p. 441–552. Available from: <https://onlinelibrary.wiley.com/doi/abs/10.1002/3527608001.ch23>
